# Supplementary material for: A genome-wide genetic map of NB-LRR disease resistance loci in potato
Source: PubMed Central journal article supplement — Theor Appl Genet. 2011 May 18;123(3):493–508. doi: 10.1007/s00122-011-1602-z (PMC3135832; doi:10.1007/s00122-011-1602-z), 2011-05-18
Supplement: 122_2011_1602_MOESM1_ESM.pdf [file 122_2011_1602_MOESM1_ESM.pdf]

**A genome-wide genetic map of NB-LRR disease resistance loci in potato.**

Theoretical and Applied Genetics

Erin Bakker\*, Theo Borm, Pjotr Prins, Edwin van der Vossen, Gerda Uenk, Marjon Arens, Jan de Boer, Herman van Eck, Mariëlle Muskens, Jack Vossen, Gerard van der Linden, Roeland van Ham, Rene Klein-Lankhorst, Richard Visser, Geert Smant, Jaap Bakker, Aska Govere

\*Laboratory of Nematology, Wageningen University and Research Centre, Droevendaalsesteeg 1, 6708 PB, Wageningen, The Netherlands

**Supplemental Table 1** SSR forward (F) and reverse (R) primer sequences and simple sequence repeats

| BAC       | SSR     | F                       | R                          |
|-----------|---------|-------------------------|----------------------------|
| RGH-SSR1  | (AT)31  | TATCACTAGCGGGACGAACC    | CGCAAGGCTTTAAAAACGTC       |
| RGH-SSR2  | (TTA)6  | TATTTAATCGGCTCGGCTTC    | TGGGACATTGATGCTCCTG        |
| RGH-SSR3  | (AT)16  | AGTTGTCCTGATATTGGCGG    | TTTTGAGTTTGTCCTCCCTCC      |
| RGH-SSR4  | (AT)11  | GGGTCGATGATCCATTTATTG   | CCCTTTTGTCCATATCAGTTG      |
| RGH-SSR5  | (AT)7   | TTTTGTTTGGCTAGTTGCC     | ATCGCGCATCACACAGATAC       |
| RGH-SSR6  | (TTC)6  | CCGCGTAGTTGACAATTTCC    | ACCACTCTCCTCCTCTTCC        |
| RGH-SSR7  | (AT)30  | TTGTTGAAAACGTTACCCTGC   | TCGAGTCGAGAGTCTTCCAG       |
| RGH-SSR8  | (AGG)13 | GAATTTTCTCCACTGGCAGC    | TCCAAGGAAACAAAACCTTGACC    |
| RGH-SSR9  | (AG)9   | GATCCGACATCGATCGTACC    | ACTTGGGTGCAACTTCCTTG       |
| RGH-SSR10 | (AT)7   | CCATTGATGGAATGCAGATG    | TACCGAACGAAAAATCAGGC       |
| RGH-SSR11 | (AT)19  | TTACCTTCTGGAAAACATGCAC  | TCACCATGAACCCTATTTTGAG     |
| RGH-SSR12 | (TTC)6  | CAGTTTCTTGCTTCTCCACG    | AGGCCTCTCAGATGCTATCG       |
| RGH-SSR13 | (TTG)6  | TCCGTTGGTCTATCGGAAAC    | TCCATGGGGTATTTGCTACC       |
| RGH-SSR14 | (AG)7   | GCTGTTGAATTATGGCCAAG    | AATCTGCAAGGCAAAACAGG       |
| RGH-SSR15 | (TAA)6  | TTAGCCATCAACTCAAATGCC   | GTATCTCTTGCTGCCCATCC       |
| RGH-SSR16 | (CT)11  | CATCTGCTTGAATGATTATCGC  | CTCTTCTCGTTCCTTTCCC        |
| RGH-SSR17 | (TTA)6  | GGTTTAGTTTCGTTTGAAAAGCC | GACGAGTTCGGAACCAAAAG       |
| RGH-SSR18 | (AG)8   | ATCCATCACAGCAAACGACC    | TGCAAAGCAAAACAGGAAAC       |
| RGH-SSR19 | (CAT)6  | ATGCTCGTTTGAAGCTGACC    | CTAAGCAAGGTGGGAAGCAG       |
| RGH-SSR20 | (AT)7   | GGAATTCTGGTTTGTGGTG     | TCTCAACAAGAAGCAGTCGG       |
| RGH-SSR21 | (TTC)12 | ATTGGACGTTGCTCCTATGG    | CGCCGATCCTAGATCAATTC       |
| RGH-SSR22 | (TTC)6  | AGTCCGGGGTATTCGTTTTTC   | GAAAAGGAAAAGAGGGTCCG       |
| RGH-SSR23 | (CAT)6  | TTGGTGATTCATTCCACTTTTG  | GGGAGTAAAAGGAATGACGG       |
| RGH-SSR24 | (AG)7   | AGTCCCCTCTTTTCATCCC     | ATTATCGAACTCGCTCTCCG       |
| RGH-SSR25 | (TGA)6  | TCCGGGAGAATTAGACGATG    | TTTATGGGGAGCAGTTGAGG       |
| RGH-SSR26 | (TTC)19 | TTGAACGTTTTACATTCATTG   | TTGGCTCTTGCCCTCTAGTC       |
| RGH-SSR27 | (GT)23  | TGTAGAACAGTGCGTGTGTCG   | ATCTCCCCTTGATTGAACCC       |
| RGH-SSR28 | (CCT)6  | TTGATTAAGAAACCTCGCCG    | TTGGTCCTTACGGTTTTTC        |
| RGH-SSR29 | (AT)14  | GAGAGGCTCTTCCAGCTCAC    | GCAGATGACATACAAAGCAAG<br>G |
| RGH-SSR30 | (TTC)8  | TTGCGTTCAGCTCACTCAAG    | CACCAATTTGGGTTTCGAAAG      |
| RGH-SSR31 | (TCA)6  | AATTCTCCGTCTCTGTTACAG   | TATCGGCGATTCCATAATCC       |
| RGH-SSR32 | (CT)8   | TGGGTATAGCCAACACTGAATG  | AAGCTCGAAGAAGTGGATTTG      |

---

|           |                 |                            |                         |
|-----------|-----------------|----------------------------|-------------------------|
| RGH-SSR33 | (CAT)7          | TGTCAACGTCTAGCTGCCAC       | AATATCGCATGGCTAGCACC    |
| RGH-SSR34 | (AT)7           | AGCCACATGTAGTTGAGGGG       | GACGAGGACCATTATTTGCG    |
| RGH-SSR35 | (GT)9           | GCCAGACAGCAGATGAAAGC       | CCTTCAAGAATTGCAGAAACAG  |
| RGH-SSR36 | (AGG)7          | AGACAGCTAGCACCAGTCGG       | AGGAAGCTCAAAAACGTTTCG   |
| RGH-SSR37 | (AT)17          | GCTTTAGAAGGAAGACAACAC<br>G | CCATGTAGACGTCCCAGAATC   |
| RGH-SSR38 | (TTC)7          | TCAGAGGCAGCCTAACAACTC      | TCCATCTCTCTCAGCCTTGG    |
| RGH-SSR39 | (AG)9           | ATCAGAAAGAGTATCGGCCG       | CAACTTCCTAAGCCGTTGTG    |
| RGH-SSR40 | (AC)18          | TTGCCGGATGTTACACTAACC      | ATATGGGACACACGTGCAAC    |
| RGH-SSR41 | (AT)23          | TCGACATTCATCCTGAATCAAC     | TTTACACTTTTTGAGCTTCCCAC |
| RGH-SSR42 | (AT)22          | AATTCTGGTTGGCTGGAATG       | AGATAAGGGATGATTTTGGGC   |
| RGH-SSR43 | (TTC)6          | TTTGGAGGCTTGGATTGAAC       | GAAAACCGTAGATCGTGTTCG   |
| RGH-SSR44 | (TTC)7          | CCTCCTCTCCTCTTCTCC         | GATAAATGAACCCCGTGCTC    |
| RGH-SSR45 | (CT)7           | ACGAGCAATTTGCAAACAAG       | GCTGTTGAATTATGGCCAAG    |
| RGH-SSR46 | (TTG)6          | TGACTCCCGCTTTGGTTATC       | AAGTGGGGTTTGGAGGGTAG    |
| RGH-SSR47 | (GT)8           | TTATGGATATGCCGGAGACC       | TCTCAAACGAACACGAAAAG    |
| RGH-SSR48 | (AC)16(AT)<br>9 | AATTCTTTGAAATTGGCCCC       | CACACCCAACAATCTTTCCC    |
| RGH-SSR49 | (AT)7           | TGGCACAATGACAGCTTACC       | TGCACTTTGAAGCTTTCCAC    |
| RGH-SSR50 | (AG)7           | TCATTTACGTGATACTTTGGGC     | ATCACCTGGGTCCGATCTAC    |

---
