# Supplementary material for: A genome-wide genetic map of NB-LRR disease resistance loci in potato
Source: PubMed Central journal article supplement — Theor Appl Genet. 2011 May 18;123(3):493–508. doi: 10.1007/s00122-011-1602-z (PMC3135832; doi:10.1007/s00122-011-1602-z), 2011-05-18
Supplement: 122_2011_1602_MOESM2_ESM.pdf [file 122_2011_1602_MOESM2_ESM.pdf]

**A genome-wide genetic map of NB-LRR disease resistance loci in potato.**

Theoretical and Applied Genetics

Erin Bakker\*, Theo Borm, Pjotr Prins, Edwin van der Vossen, Gerda Uenk, Marjon Arens, Jan de Boer, Herman van Eck, Mariëlle Muskens, Jack Vossen, Gerard van der Linden, Roeland van Ham,

Rene Klein-Lankhorst, Richard Visser, Geert Smant, Jaap Bakker, Aska Govere

\*Laboratory of Nematology, Wageningen University and Research Centre, Droevendaalsesteeg 1, 6708 PB, Wageningen, The Netherlands

**Supplemental Table 2** CAPS primer sequences, their annealing temperature (T<sub>m</sub>) in °C and their appropriate endonuclease (enzyme).

| BAC        | F                    | R                     | T <sub>m</sub> (°C) | enzyme   | Source                       |
|------------|----------------------|-----------------------|---------------------|----------|------------------------------|
| RGH-CAPS1  | CAAGGAACTGCTAGCAAACG | TTGTACGAGCCATTGACACC  | 54                  | HpyCH4IV | this study                   |
| RGH-CAPS2  | ACAGAACAAAGGCGTTCAGG | CAACTATGACACATAGCAGG  | 54                  | HaeIII   | this study                   |
| RGH-CAPS3  | CCGTCATTCTAACTTGACGC | AGGACTTATGTGCCAGTTGG  | 54                  | AluI     | this study                   |
| RGH-CAPS4  | AAGCCATGTCTTTCCTCTGG | GCGTGTGACAAGTGTTAATGG | 54                  | RsaI     | this study                   |
| RGH-CAPS5  | TGTCCACATAAATTGCAGC  | AGACAATTGGCTGAACCTCG  | 54                  | -        | this study                   |
| RGH-CAPS6  | GATCCACTGCGGTATTTTGG | TGGGTAAGGGATTGCTACG   | 54                  | AluI     | this study                   |
| RGH-CAPS7  | TTTCGTCCTACATCGCATCC | GTTGTTTCATGCAAGCTGCC  | 54                  | HpaII    | this study                   |
| RGH-CAPS8  | GACTAACAGACCATGAGTGG | ATGTGCAATTCCACAGTACC  | 54                  | -        | this study                   |
| RGH-CAPS9  | GACATCAATGGAAACTTGGG | AAGTCTCAAGTGATGTTGGG  | 54                  | -        | this study                   |
| RGH-CAPS10 | GGTACCTTGACGCTCTTTGC | TGACGGGTACCATACTGG    | 54                  | HpaII    | this study                   |
| RGH-CAPS11 | GTGTGTCCTTCCAACATGC  | GAGTGGTAGTAGTCTACACC  | 50                  | AluI     | this study                   |
| RGH-CAPS12 | AAATCAAGTCAACACCCTGC | TTGTCAGTAGAGAAGCATCC  | 54                  | HaeIII   | this study                   |
| RGH-CAPS13 | TCATGAGGTTGATCTTGAGC | AATAGCTATACGTGCCGTCC  | 52                  | -        | this study                   |
| RGH-CAPS14 | ATGAGCGTTCTTGAATAGGC | TGAACTTAGGTTGAGAGGGG  | 54                  | DPNII    | this study                   |
| RGH-CAPS15 | GTCATAGTCCATCAGTAGCC | TCAATTTTAAGAGGGGTTGG  | 50                  | -        | this study                   |
| RGH-CAPS16 | GTTGGTTTGACTTGTTTTGG | AACATTGTGGTGGTTGTTGG  | 53                  | -        | this study                   |
| CP108      | GTCCATTCGGTTTAGCTGCA | CTAAAACCCTTCCAAAACACT | 52                  | AluI     | (Bouarte-Medina et al. 2002) |
| CP11       | TATGACTTGCTGGAGAAGGG | ATAAACTTTCTGGTGAATCC  | 52                  | HaeIII   | PoMaMo                       |
| GP501      | GGAAACAAAAGCTCAATGGC | GAACCAACGATTGACTATGG  | 54                  | TaqI     | PoMaMo                       |
| TG24R      | ATTGCTGAAACAAGTGTGGG | TTCAGACCAGATAACTGAGG  | 54                  | -        | PoMaMo                       |
| TG21F      | CATGAAGCAAAGGAAGAGGC | CTTTTGTGGGAATGGAAAGG  | 54                  | NlaIII   | SOL Genomics Network         |
| GP26       | CTGCAGGTTAATGTAGTTAG | ACTGTGATGTAAGAGTACCC  | 54                  | DpnII    | PoMaMo                       |
| TG33F      | AGGTACCTCAACCAGATGAG | GATGTCTAGTTCATGTCAGC  | 54                  | HpaII    | SOL Genomics Network         |
| TG244      | ATCAGGACTCAAGAAGTTGG | CTTGACACACTCAAATGTCC  | 54                  | HhaI     | SOL Genomics Network         |
| GP80       | TGTTGGGAGAAGAAGAGAGC | TCCTGAAGTGGTTCATCACG  | 54                  | HaeIII   | PoMaMo                       |
| GP517      | GGAAACAAAGGTTCTGCTGG | ATTTAGCCGTTGTATCGTGC  | 54                  | HpyCH4IV | PoMaMo                       |
| GP510      | GCACCTGGTTTAAGCTTTGC | GTATGCATTCTGGAACAAGC  | 54                  | ApoI     | PoMaMo                       |

|         |                            |                            |    |        |                            |
|---------|----------------------------|----------------------------|----|--------|----------------------------|
| GP180   | TCCACCCCTGGATTCAAGAA       | TCAAACCTCCTTCACAAAGCA      | 54 | Alul   | (Oberhagemann et al. 1999) |
| Fbp-cy  | TGAAGAACCATCAGCGGGATAC     | TGCAGGGAGAAGATCAAAAGAAAC   | 54 | Rsal   | (Chen et al. 2001)         |
| GP221   | TCGTTTGGTGACTGAACAGG       | CTGCAGCACTAAAGACAGTAC      | 54 | Alul   | PoMaMo                     |
| TG339R  | ACTCTTTCGGCCTACAAGTC       | ATCCTTGTAGGACTCCTCTC       | 54 | DpnII  | SOL Genomics Network       |
| GP511   | CCAACCTTTGATGGTTTCTGC      | TCGTCTGCAAGAATACTAGAC      | 54 | HpaII  | SOL Genomics Network       |
| SPUD237 | TTCCTGCTGATACTGACTAGAAAACC | AGCCAAGGAAAAGCTAGCATCCAAG  | 54 | HaeIII | (De Jong et al. 1997)      |
| BA13I2  | CAAGCTTC TGGATTAAGG AGG    | ATATGGTCAGGTTGTCCAGG       | 54 | -      | PoMaMo                     |
| T1198   | AGCAGCAAACCTTACGGTAGC      | ATCACTGTGCATTATCACCC       | 54 | HhaI   | SOL Genomics Network       |
| TG472   | TACCTGATTCCAAGCATCGC       | TCTGTTGGGAGTCTTAATCC       | 54 | RsaI   | SOL Genomics Network       |
| Sus3    | CATGACAAGGAAAGCATGACCCC    | GCAAAGTAAATCTTATACATGTGACC | 54 | TaqI   | (Chen et al. 2001)         |
| T1257   | ATGGAATTGGATCTGGATCG       | GCATGACGCATAAGGATAGC       | 54 | HhaI   | SOL Genomics Network       |
| CT148   | ATTCCAGCTGCTGCTTTTGC       | GACAGGCCACTGAAGTTTGC       | 54 | DdeI   | PoMaMo                     |
| CT183R  | CAACTGTACTGGTCTTCAGG       | GCAAGATCTTCACGTGCTTC       | 54 | MseI   | SOL Genomics Network       |
| TG415F  | GCAGCTTTAGTTTTGTCAGC       | ATCAGGATCCAATGGGAAGC       | 54 | DpnII  | SOL Genomics Network       |
| GP101   | GGCATTCTATGGTATCAGAG       | GCTTAACATGCAAAGGTTAAA      | 51 | NlaIII | PoMaMo                     |
| T0521   | CAGTCGGCGCAGTTTCAAAA       | GCATTACCTAGATCAATGCC       | 49 | Alul   | SOL Genomics Network       |
| GP97    | CATCTACAGCACCAGGTACC       | ACAAAAGACTACAGAGCACC       | 54 | -      | PoMaMo                     |
| TG303   | TGGGGTTCATCACAGATTCC       | GTAAGGGTTGTTCTTGTGC        | 54 | Alul   | SOL Genomics Network       |
| ADG2    | ATACACTCATCTAAATTTGATGG    | ACTTAACTGCATCATGTTCAAG     | 54 | HpaII  | Sorri et al., TAG (1999)   |
| NI27    | TAGAGAGCATTAAAGAAGCTGC     | TTTTGCCTACTCCCGGCATG       | 54 | -      | (Marczewski et al. 2001)   |
| GP269   | CAAGGAGTACTGTTTGCAGG       | TCAAGTCCATTGGTTTACCC       | 54 | DpnII  | PoMaMo                     |
| T882    | GGACAGTGTAGTCTTCTTCC       | CCAAAGCTCCCTCCAAAAGC       | 54 | Alul   | SOL Genomics Network       |
| GP81    | CGTTTCCTACAATTGGAAGC       | CAGGATAGAGAGACTAATGC       | 54 | TaqI   | PoMaMo                     |

Bouarte-Medina T, Fogelman E, Chani E, Miller AR, Levin I, Levy D, Veilleux RE (2002) Identification of molecular markers associated with leptine in reciprocal backcross families of diploid potato. *Theoretical and Applied Genetics* 105:1010-1018

Chen X, Salamini F, Gebhardt C (2001) A potato molecular-function map for carbohydrate metabolism and transport. *Theoretical and Applied Genetics* 102:284-295

De Jong W, Forsyth A, Leister D, Gebhardt C, Baulcombe D (1997) A potato hypersensitive resistance gene against potato virus X maps to a resistance gene cluster on chromosome 5. *Theoretical and Applied Genetics* 95:246-252

Marczewski W, Flis B, Syller J, Schöfer-Pregl R, Gebhardt C (2001) A major quantitative trait locus for resistance to Potato leafroll virus is located in a resistance hotspot on potato chromosome XI and is tightly linked to N-gene-like markers. *Molecular Plant-Microbe Interactions* 14:1420-1425

Oberhagemann P, Chatot-Balandras C, Schöfer-Pregl R, Wegener D, Palomino C, Salamini F, Bonnel E, Gebhardt C (1999) A genetic analysis of quantitative resistance to late blight in potato: Towards marker-assisted selection. *Molecular Breeding* 5:399-415
