# Supplementary material for: A genome-wide genetic map of NB-LRR disease resistance loci in potato
Source: PubMed Central journal article supplement — Theor Appl Genet. 2011 May 18;123(3):493–508. doi: 10.1007/s00122-011-1602-z (PMC3135832; doi:10.1007/s00122-011-1602-z), 2011-05-18
Supplement: 122_2011_1602_MOESM3_ESM.pdf [file 122_2011_1602_MOESM3_ESM.pdf]

A genome-wide genetic map of NB-LRR disease resistance loci in potato.

Theoretical and Applied Genetics

Erin Bakker<sup>1</sup>, Theo Borm, Pjotr Prins, Edwin van der Vossen, Gerda Uenik, Marjon Arens, Jan de Boer, Herman van Eck, Mariëlle Muskens, Jack Vossen, Gerard van der Linden, Roeland van Ham, Rene Klein-Lankhorst, Richard Visser, Geert Smant, Jaap Bakker, Aska Govere

<sup>1</sup>Laboratory of Nematology, Wageningen University and Research Centre, Droevendaalsesteeg 1, 6708 PB, Wageningen, The Netherlands

**Supplemental Table 3 A** list of RGH loci per linkage group as identified in this study. Each row represents a significant RGH domain BLASTp hit, with in the columns from left to right: The name of the RGH locus, the BAC fragment on which the BLASTp hit was found, the Genbank accession number of the BAC sequence, the linkage group (LG) and the bin range (bin) on which the BAC is mapped in the UHD map, the translational frame where the BLASTp hit was found and the amino acid position of the BLASTp hit (start – stop) on the BAC fragment. The significance of the BLASTp hit (Expected) and the method that was used to map the BAC (anchor). The last column indicates the number of (partial) RGHs that were detected. In the first columns, the *R* genes syntenic to the RGH loci are indicated in italics.

| Cluster          | BAC fragment      | genbank          | LG       | BIN      | BLAST         | frame   | start | stop           | Expected       | Anchor                               | (partial) RGH |
|------------------|-------------------|------------------|----------|----------|---------------|---------|-------|----------------|----------------|--------------------------------------|---------------|
| Ia-TNL           | RH078E17-17-9310  | AC238121         | 1        | 8-12     | Bs4-TIR       | 1       | 712   | 760            | E=2.44153e-10  | potato physical map                  | 1             |
|                  | RH078E17-6-3224   |                  | 1        | 8-12     | Bs4-TIR       | 1       | 800   | 963            | E=2.95083e-76  |                                      | 1             |
|                  | RH097L03-10-5021  | AC238183         | 1        | 9-15     | Bs4-TIR       | -1      | 1414  | 1462           | E=1.00852e-09  | RGH-SSR27                            | 1             |
|                  | RH097L03-14-10105 |                  | 1        | 9-15     | Bs4-TIR       | -1      | 2310  | 2419           | E=3.9484e-50   |                                      | 1             |
|                  | RH097L03-14-10105 |                  | 1        | 9-15     | Bs4-TIR       | -3      | 2457  | 2509           | E=2.9768e-17   |                                      | 1             |
|                  | RH097L03-14-10105 |                  | 1        | 9-15     | Bs4-NBS       | -3      | 2573  | 2933           | E=e-130        |                                      | 1             |
|                  | RH097L03-14-10105 |                  | 1        | 9-15     | N-Nt-NBS      | -3      | 2573  | 2920           | E=2.61525e-138 |                                      | 1             |
|                  | RH150D18-1-42511  | AC232102         | 1        | 9-15     | Bs4-TIR       | -2      | 12489 | 12598          | E=1.72905e-49  | BACend tool                          | 1             |
|                  | RH150D18-1-42511  |                  | 1        | 9-15     | WRR4-exon1    | -2      | 12491 | 12601          | E=7.15232e-23  |                                      | 1             |
|                  | RH150D18-1-42511  |                  | 1        | 9-15     | Bs4-TIR       | -1      | 12648 | 12700          | E=4.59387e-17  |                                      | 1             |
|                  | RH150D18-1-42511  |                  | 1        | 9-15     | N-Nt-NBS      | -1      | 12764 | 13111          | E=2.28842e-138 |                                      | 1             |
|                  | RH037B15-4-2080   | AC237998         | 1        |          | N-Nt-NBS      | 2       | 1     | 245            | E=6.97262e-94  | marker blast (CT62)                  | 1             |
|                  | RH037B15-4-2080   |                  | 1        |          | N-Nt-LRR      | 3       | 416   | 534            | E=2.89972e-15  |                                      | 1             |
| RH037B15-2-2862  |                   | 1                |          | Bs4-CNL  | 2             | 421     | 506   | E=5.43444e-09  |                | 1                                    |               |
| Ib-CNL           | RH140O20-2-47006  | AC238257         | 1        | 9-15     | Mi-1-CC       | 3       | 190   | 467            | E=5.79453e-68  | RGH-SSR35                            | 1             |
|                  | RH140O20-2-47006  |                  | 1        | 9-15     | CaMi-CC       | 1       | 493   | 598            | E=2.22665e-27  |                                      | 1             |
|                  | RH140O20-2-47006  |                  | 1        | 9-15     | Rpi-blb2-NBS  | 1       | 589   | 946            | E=2.6987e-116  |                                      | 1             |
|                  | RH140O20-2-47006  |                  | 1        | 9-15     | R1-LRR        | 1       | 811   | 916            | E=5.62253e-07  |                                      | 1             |
|                  | RH140O20-2-47006  |                  | 1        | 9-15     | CaMi-LRR      | 3       | 941   | 1265           | E=3.16611e-68  |                                      | 1             |
| Ic-CNL           | RH076K12-17-3666  | AC239995         | 1        | 13-14    | Dm3-NBS       | -3      | 2     | 181            | E=5.51006e-13  | RGH-CAPS7                            | 1             |
|                  | RH076K12-17-3666  |                  | 1        | 13-14    | Dm3-NBS       | -2      | 71    | 119            | E=0.00141828   |                                      | 1             |
|                  | RH076K12-17-3666  |                  | 1        | 13-14    | Dm3-LRR       | -3      | 232   | 556            | E=0.00176886   |                                      | 1             |
|                  | RH076K12-17-3666  |                  | 1        | 13-14    | Dm3-LRR       | -2      | 578   | 736            | E=2.86655e-07  |                                      | 1             |
| Id-TNL           | RH065I22-5-46247  | AC238084         | 1        | 81       | Gro1-4-TIR    | -3      | 2320  | 2474           | E=1.30582e-25  | RGH-CAPS6                            | 1             |
|                  | RH065I22-5-46247  |                  | 1        | 81       | N-Nt-NBS      | -2      | 2567  | 2919           | E=3.40836e-59  |                                      | 1             |
|                  | RH065I22-5-46247  |                  | 1        | 81       | N-Nt-LRR      | -2      | 3123  | 3352           | E=2.85008e-17  |                                      | 1             |
| IVa-CNL          | RH044G10-2-20622  | AC238021         | 4        | 1-14     | Dm3-Nterminus | -3      | 2074  | 2236           | E=6e-04        | RGH-SSR9                             | 1             |
|                  | RH044G10-2-20622  |                  | 4        | 1-14     | Dm3-NBS       | -3      | 2237  | 2551           | E=3.27874e-48  |                                      | 1             |
|                  | RH044G10-2-20622  |                  | 4        | 1-14     | Dm3-LRR       | -2      | 3169  | 3294           | E=4.77011e-06  |                                      | 1             |
|                  | RH044G10-2-20622  |                  | 4        | 1-14     | Dm3-LRR       | -3      | 3568  | 3714           | E=9.20803e-11  |                                      | 1             |
|                  | RH044G10-2-20622  |                  | 4        | 1-14     | Dm3-NBS       | -1      | 4477  | 4790           | E=1.02717e-51  |                                      | 1             |
|                  | RH044G10-2-20622  |                  | 4        | 1-14     | Rps2-LRR      | -1      | 4796  | 4992           | E=1.09329e-05  |                                      | 1             |
|                  | RH044G10-2-20622  |                  | 4        | 1-14     | LR1-LRR       | -1      | 5226  | 5375           | E=0.00373549   |                                      | 1             |
|                  | RH044G10-2-20622  |                  | 4        | 1-14     | Dm3-LRR       | -1      | 5488  | 5635           | E=9.13682e-09  |                                      | 1             |
|                  | RH079O07-5-67772  | AC238124         | 4        | 1-3      | Dm3-Nterminus | -3      | 16823 | 16932          | E=0.00254987   | RGH-SSR20                            | 1             |
|                  | RH079O07-5-67772  |                  | 4        | 1-3      | Dm3-NBS       | -3      | 16986 | 17300          | E=1.48452e-47  |                                      | 1             |
|                  | RH079O07-5-67772  |                  | 4        | 1-3      | Mla7-LRR      | -3      | 17392 | 17486          | E=0.0148997    |                                      | 1             |
|                  | RH079O07-5-67772  |                  | 4        | 1-3      | Rps2-LRR      | -1      | 18120 | 18287          | E=5.07409e-06  |                                      | 1             |
|                  | RH079O07-5-67772  |                  | 4        | 1-3      | Dm3-LRR       | -3      | 18369 | 18525          | E=8.05962e-10  |                                      | 1             |
| RH079O07-5-67772 |                   | 4                | 1-3      | Dm3-NBS  | -2            | 19167   | 19480 | E=1.08864e-52  |                | 1                                    |               |
| RH079O07-5-67772 |                   | 4                | 1-3      | Dm3-LRR  | -2            | 19519   | 19818 | E=2.40443e-09  |                | 1                                    |               |
| IVb-CNL          | RH078F10-1-16883  | AC238122         | 4        | 11-14    | Hero-CC       | -2      | 785   | 1315           | E=2.36954e-180 | NBS profiling 5A6A12/ 5A6A22/ 5A6H28 | 1             |
|                  | RH078F10-1-16883  |                  | 4        | 11-14    | Hero-NBS      | -2      | 1316  | 1679           | E=1.13304e-155 |                                      | 1             |
|                  | RH078F10-1-16883  |                  | 4        | 11-14    | Hero-LRR      | -2      | 1680  | 2032           | E=8.33796e-111 |                                      | 1             |
|                  | RH078F10-1-16883  |                  | 4        | 11-14    | Hero-CC       | -1      | 2059  | 2500           | E=2.36146e-163 |                                      | 1             |
|                  | RH078F10-1-16883  |                  | 4        | 11-14    | Hero-NBS      | -1      | 2501  | 2864           | E=6.92748e-155 |                                      | 1             |
|                  | RH078F10-1-16883  |                  | 4        | 11-14    | Hero-LRR      | -1      | 2865  | 3217           | E=3.11599e-110 |                                      | 1             |
|                  | RH078F10-2-7509   |                  | 4        | 11-14    | Hero-LRR      | 3       | 715   | 826            | E=1.36756e-15  |                                      | 1             |
|                  | RH078F10-2-7509   |                  | 4        | 11-14    | Hero-LRR      | 1       | 869   | 1004           | E=2.82929e-40  |                                      | 1             |
|                  | RH078F10-3-12317  |                  | 4        | 11-14    | Hero-CC       | 2       | 2316  | 2617           | E=2.25688e-89  |                                      | 1             |
|                  | RH078F10-3-12317  |                  | 4        | 11-14    | Hero-CC       | 3       | 2564  | 2892           | E=2e-80        |                                      | 1             |
|                  | RH078F10-3-12317  |                  | 4        | 11-14    | Hero-NBS      | 3       | 2893  | 3242           | E=1.15712e-140 |                                      | 1             |
|                  | RH078F10-3-12317  |                  | 4        | 11-14    | Hero-LRR      | 3       | 3243  | 3604           | E=4.27481e-113 |                                      | 1             |
|                  | RH078F10-5-7077   |                  | 4        | 11-14    | Hero-CC       | -1      | 375   | 906            | E=0.0          |                                      | 1             |
|                  | RH078F10-5-7077   |                  | 4        | 11-14    | Hero-NBS      | -1      | 907   | 1267           | E=2.3429e-153  |                                      | 1             |
|                  | RH078F10-5-7077   |                  | 4        | 11-14    | Hero-LRR      | -1      | 1269  | 1625           | E=2.03842e-106 |                                      | 1             |
|                  | RH078F10-6-36894  |                  | 4        | 11-14    | Hero-CC       | -3      | 4606  | 4925           | E=1.51813e-104 |                                      | 1             |
|                  | RH078F10-6-36894  |                  | 4        | 11-14    | Hero-CC       | -1      | 5243  | 5386           | E=6.1643e-48   |                                      | 1             |
|                  | RH078F10-6-36894  |                  | 4        | 11-14    | Hero-CC       | -2      | 5395  | 5441           | E=4.93265e-11  |                                      | 1             |
|                  | RH078F10-6-36894  |                  | 4        | 11-14    | Hero-NBS      | -2      | 5442  | 5784           | E=2.33017e-143 |                                      | 1             |
|                  | RH078F10-6-36894  |                  | 4        | 11-14    | R1-LRR        | -2      | 5658  | 5768           | E=2.33854e-11  |                                      | 1             |
|                  | RH078F10-6-36894  |                  | 4        | 11-14    | Hero-LRR      | -1      | 5743  | 5878           | E=4.1663e-29   |                                      | 1             |
|                  | RH078F10-6-36894  |                  | 4        | 11-14    | Hero-LRR      | -3      | 5852  | 6055           | E=1.07506e-68  |                                      | 1             |
|                  | RH078F10-6-36894  |                  | 4        | 11-14    | Sw-5-LRR      | -3      | 6770  | 6909           | E=3.93271e-11  |                                      | 1             |
|                  | RH078F10-7-17949  |                  | 4        | 11-14    | Hero-CC       | -2      | 453   | 989            | E=0.0          |                                      | 1             |
|                  | RH078F10-7-17949  |                  | 4        | 11-14    | Hero-NBS      | -2      | 990   | 1350           | E=4.31053e-151 |                                      | 1             |
|                  | RH078F10-7-17949  |                  | 4        | 11-14    | Hero-LRR      | -2      | 1351  | 1700           | E=4.83633e-119 |                                      | 1             |
|                  | RH078F10-8-4130   |                  | 4        | 11-14    | Nrc1-NBS      | 1       | 191   | 533            | E=3.25181e-91  |                                      | 1             |
|                  | RH078F10-8-4130   |                  | 4        | 11-14    | Nrc1-LRR      | 1       | 540   | 904            | E=8.83518e-63  |                                      | 1             |
|                  | RH078F10-9-28707  |                  | 4        | 11-14    | Hero-CC       | -2      | 4125  | 4678           | E=0.0          |                                      | 1             |
|                  | RH078F10-9-28707  |                  | 4        | 11-14    | Hero-NBS      | -2      | 4679  | 5040           | E=9.6721e-155  |                                      | 1             |
| RH078F10-9-28707 |                   | 4                | 11-14    | Hero-LRR | -2            | 5041    | 5386  | E=2.90298e-124 |                | 1                                    |               |
| RH078F10-9-28707 |                   | 4                | 11-14    | Nrc1-CC  | 3             | 8133    | 8254  | E=6.99509e-11  |                | 1                                    |               |
| IVc-CNL          | RH143M21-1-70917  | AC238261         | 4        | 33-36    | Dm3-NBS       | 3       | 18064 | 18378          | E=3.27589e-51  | potato physical map                  | 1             |
|                  | RH143M21-1-70917  |                  | 4        | 33-36    | Dm3-LRR       | 3       | 18426 | 18699          | E=2.74544e-12  |                                      | 1             |
|                  | RH143M21-1-70917  |                  | 4        | 33-36    | Dm3-LRR       | 1       | 18720 | 18855          | E=0.000450209  |                                      | 1             |
|                  | RH143M21-1-70917  |                  | 4        | 33-36    | Dm3-LRR       | 2       | 19575 | 19721          | E=7.86266e-09  |                                      | 1             |
|                  | RH143M21-1-70917  |                  | 4        | 33-36    | R3a-LRR       | 2       | 19876 | 20014          | E=0.0367856    |                                      | 1             |
|                  | RH162D01-4-18581  | AC238307         | 4        | 33-36    | Rpg1-b-NBS    | 1       | 3716  | 3815           | E=0.000243566  | potato physical map                  | 1             |
|                  | RH191J01-5-41938  | AC237896         | 4        | 33-36    | Rpg1-b-NBS    | 1       | 6972  | 7071           | E=0.000214912  | potato physical map                  | 1             |
|                  | RH188B03-6-12377  | AC237892         | 4        | 36       | Dm3-NBS       | -2      | 1     | 146            | E=2.38732e-20  | potato physical map                  | 1             |
|                  | RH188B03-6-12377  |                  | 4        | 36       | Dm3-LRR       | -2      | 194   | 467            | E=5.26328e-12  |                                      | 1             |
|                  | RH188B03-6-12377  |                  | 4        | 36       | Dm3-LRR       | -3      | 543   | 678            | E=0.000505994  |                                      | 1             |
|                  | RH188B03-6-12377  |                  | 4        | 36       | Dm3-LRR       | -1      | 1247  | 1393           | E=8.47583e-09  |                                      | 1             |
|                  | RH188B03-6-12377  |                  | 4        | 36       | R3a-LRR       | -1      | 1548  | 1686           | E=0.0355782    |                                      | 1             |
|                  | IVd-TNL           | RH145H03-2-22300 | AC238268 | 4        | 37-44         | Bs4-TIR | 3     | 6232           | 6392           | E=5.75723e-73                        | RGH-SSR39     |

|         |                   |          |   |       |          |    |      |      |                |                     |   |
|---------|-------------------|----------|---|-------|----------|----|------|------|----------------|---------------------|---|
|         | RH145H03-2-22300  |          | 4 | 37-44 | Bs4-NBS  | 2  | 6477 | 6819 | E=1.47664e-97  |                     |   |
|         | RH145H03-2-22300  |          | 4 | 37-44 | Bs4-NBS  | 3  | 6619 | 6728 | E=8.89802e-32  |                     |   |
|         | RH145H03-3-28457  |          | 4 | 37-44 | Bs2-LRR  | 2  | 7138 | 7233 | E=3.65312e-12  |                     | 1 |
| IVe-CNL | RH082D23-7-30590  | AC238132 | 4 | 45    | Dm3-NBS  | 2  | 5835 | 6149 | E=9.85486e-51  | RGH-SSR22           | 1 |
|         | RH082D23-7-30590  |          | 4 | 45    | Dm3-LRR  | 2  | 6197 | 6470 | E=2.32416e-11  |                     |   |
|         | RH082D23-7-30590  |          | 4 | 45    | Dm3-LRR  | 3  | 6549 | 6684 | E=0.000465489  |                     |   |
|         | RH082D23-7-30590  |          | 4 | 45    | Dm3-LRR  | 1  | 7218 | 7364 | E=1.05292e-08  |                     |   |
|         | RH082D23-7-30590  |          | 4 | 45    | R3a-LRR  | 1  | 7520 | 7658 | E=0.0517902    |                     |   |
| IVf-TNL | RH176O03-1-55783  | AC237880 | 4 | 103   | Rpp5-LRR | -2 | 144  | 350  | E=0.00369475   | potato physical map | 1 |
|         | RH176O03-1-55783  |          | 4 | 103   | N-NL-LRR | -2 | 534  | 724  | E=0.00687231   |                     |   |
| Va-CNL  | RH034J11-1-13771  | AC239974 | 5 | 20    | R1-CC    | -2 | 1252 | 1797 | E=0.0          | potato physical map | 1 |
|         | RH034J11-1-13771  |          | 5 | 20    | R1-NBS   | -2 | 1798 | 2015 | E=2.85138e-78  |                     |   |
|         | RH034J11-1-13771  |          | 5 | 20    | Rx1-NBS  | -2 | 2716 | 2877 | E=4.95413e-33  |                     |   |
|         | RH034J11-1-13771  |          | 5 | 20    | R1-LRR   | -2 | 2782 | 2888 | E=1.2575e-50   |                     |   |
|         | RH034J11-1-13771  |          | 5 | 20    | R1-LRR   | -1 | 2823 | 3199 | E=6.29162e-166 |                     |   |
|         | RH034J11-1-13771  |          | 5 | 20    | R1-LRR   | -3 | 4039 | 4319 | E=8.18012e-124 |                     |   |
|         | RH034J11-10-9043  |          | 5 | 20    | R1-CC    | -3 | 2386 | 2681 | E=1.92576e-147 |                     | 1 |
|         | RH034J11-10-9043  |          | 5 | 20    | R1-NBS   | -3 | 2682 | 2861 | E=4.02934e-94  |                     |   |
|         | RH034J11-11-4209  |          | 5 | 20    | R1-LRR   | -1 | 9    | 132  | E=1.26878e-48  |                     | 1 |
|         | RH034J11-4-7075   |          | 5 | 20    | R1-CC    | -1 | 1568 | 2115 | E=0.0          |                     | 1 |
|         | RH034J11-4-7075   |          | 5 | 20    | R1-NBS   | -1 | 2116 | 2250 | E=2.56645e-67  |                     |   |
|         | RH034J11-9-15747  |          | 5 | 20    | R1-CC    | -1 | 4214 | 4482 | E=1.20567e-93  |                     | 1 |
|         | RH083B01-10-7700  | AC238137 | 5 | 20    | R1-CC    | 3  | 269  | 822  | E=0.0          | potato physical map | 1 |
|         | RH083B01-10-7700  |          | 5 | 20    | R1-NBS   | 3  | 823  | 1035 | E=5.83995e-109 |                     |   |
|         | RH083B01-10-7700  |          | 5 | 20    | R1-LRR   | 3  | 1036 | 1142 | E=8.42753e-50  |                     |   |
|         | RH083B01-10-7700  |          | 5 | 20    | R1-LRR   | 2  | 1078 | 1460 | E=1.51225e-162 |                     |   |
|         | RH083B01-2-3308   |          | 5 | 20    | R1-LRR   | 3  | 10   | 386  | E=5.793e-163   |                     | 1 |
|         | RH083B01-4-18259  |          | 5 | 20    | R1-CC    | 2  | 1689 | 2098 | E=1.50052e-173 |                     | 1 |
|         | RH083B01-4-18259  |          | 5 | 20    | R1-CC    | 1  | 2093 | 2229 | E=1.63804e-72  |                     |   |
|         | RH083B01-4-18259  |          | 5 | 20    | R1-NBS   | 3  | 2186 | 2336 | E=3.66983e-71  |                     |   |
|         | RH083B01-4-18259  |          | 5 | 20    | Nrc1-NBS | 1  | 2371 | 2541 | E=1.08202e-30  |                     |   |
|         | RH083B01-4-18259  |          | 5 | 20    | R1-LRR   | 1  | 2440 | 2546 | E=2.9682e-52   |                     |   |
|         | RH083B01-4-18259  |          | 5 | 20    | R1-LRR   | 3  | 2507 | 2620 | E=9.84161e-33  |                     |   |
|         | RH083B01-4-18259  |          | 5 | 20    | R1-LRR   | 2  | 2881 | 3190 | E=1.79426e-119 |                     |   |
|         | RH083B01-6-19429  |          | 5 | 20    | R1-CC    | 2  | 2157 | 2703 | E=0.0          |                     | 1 |
|         | RH083B01-6-19429  |          | 5 | 20    | R1-NBS   | 2  | 2704 | 2916 | E=1.24568e-114 |                     |   |
|         | RH083B01-6-19429  |          | 5 | 20    | R1-LRR   | 2  | 2917 | 3429 | E=0.0          |                     |   |
|         | RH083B01-6-19429  |          | 5 | 20    | R1-CC    | 3  | 4550 | 5095 | E=0.0          |                     | 1 |
|         | RH083B01-6-19429  |          | 5 | 20    | R1-NBS   | 3  | 5096 | 5313 | E=2.18322e-78  |                     |   |
|         | RH083B01-6-19429  |          | 5 | 20    | Pib-NBS  | 3  | 6014 | 6106 | E=3.38184e-10  |                     |   |
|         | RH083B01-7-24170  |          | 5 | 20    | R1-CC    | 1  | 188  | 456  | E=7.55623e-94  |                     | 1 |
|         | RH083B01-7-24170  |          | 5 | 20    | R1-CC    | 3  | 3376 | 3671 | E=2.39161e-148 |                     |   |
|         | RH083B01-7-24170  |          | 5 | 20    | R1-NBS   | 3  | 3672 | 3884 | E=2.07228e-114 |                     |   |
|         | RH083B01-7-24170  |          | 5 | 20    | R1-LRR   | 3  | 3885 | 3953 | E=2.01814e-30  |                     |   |
|         | RH083B01-7-24170  |          | 5 | 20    | R1-LRR   | 1  | 3914 | 4346 | E=0.0          |                     |   |
|         | RH083B01-7-24170  |          | 5 | 20    | R1-LRR   | 2  | 6948 | 7158 | E=1.22563e-81  |                     |   |
|         | RH083B01-8-20441  |          | 5 | 20    | R1-CC    | 1  | 3983 | 4523 | E=0.0          |                     | 1 |
|         | RH083B01-8-20441  |          | 5 | 20    | R1-NBS   | 1  | 4524 | 4736 | E=2.61612e-116 |                     |   |
|         | RH083B01-8-20441  |          | 5 | 20    | R1-LRR   | 1  | 4737 | 4843 | E=5.23633e-51  |                     |   |
|         | RH083B01-8-20441  |          | 5 | 20    | R1-LRR   | 3  | 4818 | 5202 | E=7.02466e-160 |                     |   |
|         | RH083B01-9-17012  |          | 5 | 20    | R1-CC    | 1  | 2309 | 2887 | E=0.0          |                     | 1 |
|         | RH083B01-9-17012  |          | 5 | 20    | R1-NBS   | 3  | 2855 | 3031 | E=3.08247e-97  |                     |   |
|         | RH083B01-9-17012  |          | 5 | 20    | R1-LRR   | 3  | 3032 | 3138 | E=1.683e-52    |                     |   |
|         | RH083B01-9-17012  |          | 5 | 20    | R1-LRR   | 2  | 3172 | 3557 | E=5.11002e-164 |                     |   |
|         | RH158C09-10-19492 | AC238295 | 5 | 20    | R1-CC    | -2 | 755  | 792  | E=4.0784e-05   | potato physical map | 1 |
|         | RH158C09-10-19492 |          | 5 | 20    | R1-CC    | -1 | 787  | 1307 | E=0.0          |                     |   |
|         | RH158C09-10-19492 |          | 5 | 20    | R1-NBS   | -1 | 1308 | 1520 | E=2.14385e-112 |                     |   |
|         | RH158C09-10-19492 |          | 5 | 20    | R1-LRR   | -3 | 1572 | 1957 | E=1.04878e-158 |                     |   |
|         | RH158C09-10-19492 |          | 5 | 20    | Gpa2-NBS | -2 | 2111 | 2273 | E=4.21442e-32  |                     | 1 |
|         | RH158C09-10-19492 |          | 5 | 20    | R1-LRR   | -2 | 2172 | 2278 | E=4.46737e-52  |                     |   |
|         | RH158C09-10-19492 |          | 5 | 20    | R1-LRR   | -1 | 2363 | 2748 | E=7.82947e-160 |                     |   |
|         | RH158C09-14-17561 |          | 5 | 20    | R1-CC    | -3 | 537  | 610  | E=8.35356e-07  | potato physical map | 1 |
|         | RH158C09-14-17561 |          | 5 | 20    | R1-NBS   | -3 | 1751 | 1848 | E=1.19736e-49  |                     |   |
|         | RH158C09-14-17561 |          | 5 | 20    | R1-LRR   | -3 | 1849 | 2359 | E=0.0          |                     |   |
|         | RH158C09-15-2555  |          | 5 | 20    | R1-CC    | 2  | 175  | 356  | E=7.47487e-45  |                     |   |
|         | RH158C09-16-14597 |          | 5 | 20    | R1-CC    | 3  | 210  | 774  | E=0.0          |                     | 1 |
|         | RH158C09-16-14597 |          | 5 | 20    | R1-NBS   | 3  | 775  | 987  | E=1.52185e-114 |                     |   |
|         | RH158C09-16-14597 |          | 5 | 20    | R1-LRR   | 3  | 988  | 1094 | E=2.31091e-52  |                     |   |
|         | RH158C09-16-14597 |          | 5 | 20    | R1-LRR   | 2  | 1044 | 1424 | E=8.00701e-169 |                     |   |
|         | RH158C09-17-6896  |          | 5 | 20    | R1-CC    | -1 | 1    | 153  | E=9.05828e-73  |                     | 1 |
|         | RH158C09-17-6896  |          | 5 | 20    | R1-NBS   | -1 | 154  | 366  | E=9.38269e-114 |                     |   |
|         | RH158C09-17-6896  |          | 5 | 20    | R1-LRR   | -1 | 367  | 473  | E=6.50491e-51  |                     |   |
|         | RH158C09-17-6896  |          | 5 | 20    | R1-LRR   | -3 | 449  | 829  | E=5.64652e-165 |                     |   |
|         | RH158C09-2-1804   |          | 5 | 20    | R1-CC    | 1  | 189  | 512  | E=1.11838e-122 |                     | 1 |
|         | RH158C09-2-1804   |          | 5 | 20    | R1-CC    | 3  | 486  | 560  | E=2.04269e-30  |                     |   |
|         | RH158C09-4-13885  |          | 5 | 20    | R1-CC    | 3  | 158  | 727  | E=0.0          |                     | 1 |
|         | RH158C09-4-13885  |          | 5 | 20    | R1-NBS   | 3  | 728  | 941  | E=6.23945e-111 |                     |   |
|         | RH158C09-4-13885  |          | 5 | 20    | R1-LRR   | 3  | 942  | 1048 | E=3.14855e-50  |                     |   |
|         | RH158C09-4-13885  |          | 5 | 20    | R1-LRR   | 2  | 992  | 1377 | E=8.49844e-165 |                     |   |
|         | RH158C09-9-8263   |          | 5 | 20    | R1-CC    | -2 | 1    | 509  | E=0.0          |                     | 1 |
|         | RH158C09-9-8263   |          | 5 | 20    | R1-NBS   | -2 | 510  | 600  | E=1.96291e-42  |                     |   |
|         | RH158C09-9-8263   |          | 5 | 20    | R1-NBS   | -1 | 555  | 675  | E=1.70569e-66  |                     |   |
|         | RH158C09-9-8263   |          | 5 | 20    | R1-LRR   | -1 | 676  | 782  | E=3.12058e-52  |                     |   |
|         | RH158C09-9-8263   |          | 5 | 20    | R1-LRR   | -3 | 786  | 1165 | E=4.11585e-162 |                     |   |
|         | RH087A20-3-6770   | AC238295 | 5 | 21    | R1-CC    | -3 | 262  | 723  | E=0.0          | potato physical map | 1 |
|         | RH087A20-3-6770   |          | 5 | 21    | R1-NBS   | -3 | 724  | 936  | E=1.36502e-115 |                     |   |
|         | RH087A20-3-6770   |          | 5 | 21    | R1-LRR   | -3 | 937  | 1043 | E=2.91823e-53  |                     |   |
|         | RH087A20-3-6770   |          | 5 | 21    | R1-LRR   | -2 | 993  | 1378 | E=3.81146e-168 |                     |   |
|         | RH087A20-4-6576   |          | 5 | 21    | R1-CC    | -1 | 159  | 552  | E=3.05409e-168 |                     | 1 |
|         | RH087A20-4-6576   |          | 5 | 21    | Nrc1-NBS | -1 | 551  | 657  | E=1.63373e-19  |                     |   |
|         | RH087A20-4-6576   |          | 5 | 21    | R1-LRR   | -1 | 552  | 658  | E=6.39726e-51  |                     |   |
|         | RH087A20-4-6576   |          | 5 | 21    | R1-LRR   | -3 | 640  | 1025 | E=1.11219e-157 |                     |   |
|         | RH087A20-5-13651  |          | 5 | 21    | R1-CC    | -1 | 238  | 811  | E=0.0          |                     | 1 |
|         | RH087A20-5-13651  |          | 5 | 21    | R1-NBS   | -1 | 812  | 1025 | E=4.50504e-112 |                     |   |
|         | RH087A20-5-13651  |          | 5 | 21    | R1-LRR   | -1 | 1026 | 1132 | E=1.65563e-51  |                     |   |
|         | RH087A20-5-13651  |          | 5 | 21    | R1-LRR   | -3 | 1084 | 1472 | E=2.75916e-160 |                     |   |
|         | RH087A20-5-13651  |          | 5 | 21    | Rx1-LRR  | -3 | 2438 | 2575 | E=5.76661e-14  |                     |   |
|         | RH087A20-6-5116   |          | 5 | 21    | R1-CC    | 1  | 1025 | 1255 | E=7.16068e-78  |                     | 1 |

|        |                   |          |   |       |              |    |       |       |                |                                  |   |
|--------|-------------------|----------|---|-------|--------------|----|-------|-------|----------------|----------------------------------|---|
|        | RH087A20-7-7093   |          | 5 | 21    | R1-LRR       | -2 | 1116  | 1403  | E=6.84195e-107 |                                  | 1 |
|        | RH087A20-8-11239  |          | 5 | 21    | R1-LRR       | -3 | 2877  | 3016  | E=8.08083e-51  |                                  | 1 |
| Vb-CNL | RH149G10-2-12381  | AC237874 | 5 | 37    | Prf-CC       | 1  | 343   | 667   | E=1.11047e-109 | BACend tool/ potato physical map | 1 |
|        | RH149G10-2-12381  |          | 5 | 37    | Prf-NBS      | 1  | 668   | 946   | E=3.16034e-107 |                                  |   |
|        | RH149G10-2-12381  |          | 5 | 37    | Prf-LRR      | 2  | 940   | 1321  | E=1.85844e-165 |                                  |   |
| Vc-CNL | RH005L02-6-17698  | AC237919 | 5 | 41    | Rpi-blb2-CC  | 1  | 1     | 518   | E=5.70705e-119 | RGH-SSR3                         | 1 |
|        | RH005L02-6-17698  |          | 5 | 41    | Rpi-blb2-NBS | 1  | 519   | 585   | E=1.01924e-21  |                                  |   |
|        | RH005L02-6-17698  |          | 5 | 41    | Rpi-blb2-NBS | 3  | 529   | 816   | E=3.826e-92    |                                  |   |
|        | RH005L02-6-17698  |          | 5 | 41    | CaMi-LRR     | 3  | 841   | 1121  | E=1.71153e-60  |                                  |   |
|        | RH149N09-1-114425 | AC238277 | 5 | 45-46 | Rpi-blb2-CC  | -1 | 9368  | 9444  | E=2.62281e-09  | potato physical map              | 1 |
|        | RH149N09-1-114425 |          | 5 | 45-46 | CaMi-CC      | -2 | 10284 | 10738 | E=7.04097e-114 |                                  |   |
|        | RH149N09-1-114425 |          | 5 | 45-46 | Rpi-blb2-NBS | -2 | 10729 | 11088 | E=6.26093e-120 |                                  |   |
|        | RH149N09-1-114425 |          | 5 | 45-46 | CaMi-LRR     | -2 | 11113 | 11431 | E=1.82173e-75  |                                  |   |
|        | RH149N09-1-114425 |          | 5 | 45-46 | Rpi-blb2-LRR | -1 | 11452 | 11546 | E=0.000252079  |                                  |   |
| Vd-TNL | RH096M02-10-32550 | AC238178 | 5 | 42-47 | N-Nt-LRR     | -2 | 3125  | 3352  | E=9.7893e-49   | potato physical map              | 1 |
|        | RH096M02-10-32550 |          | 5 | 42-47 | Y-1-LRR      | -3 | 3464  | 3598  | E=9.5955e-26   |                                  |   |
|        | RH096M02-10-32550 |          | 5 | 42-47 | Bs4-CNL      | -1 | 3510  | 3627  | E=3.40293e-12  |                                  |   |
|        | RH096M02-6-14360  |          | 5 | 42-47 | Bs4-TIR      | -1 | 1558  | 1644  | E=3.09822e-23  |                                  | 1 |
|        | RH096M02-6-14360  |          | 5 | 42-47 | N-Nt-NBS     | -3 | 1668  | 1785  | E=1.08708e-29  |                                  |   |
|        | RH096M02-6-14360  |          | 5 | 42-47 | N-Nt-NBS     | -2 | 1756  | 1912  | E=1.18709e-42  |                                  |   |
|        | RH150G07-4-9219   | AC238279 | 5 | 42-47 | N-Nt-TIR     | 3  | 1657  | 1727  | E=1.78547e-20  | RGH-SSR40                        | 1 |
|        | RH150G07-4-9219   |          | 5 | 42-47 | N-Nt-NBS     | 2  | 1719  | 1837  | E=1.34887e-33  |                                  |   |
|        | RH150G07-4-9219   |          | 5 | 42-47 | N-Nt-NBS     | 1  | 1829  | 1986  | E=1.13957e-39  |                                  |   |
|        | RH050L05-3-51824  | AC238035 | 5 | 42-47 | N-Nt-TIR     | -1 | 11904 | 11974 | E=4.0469e-18   | RGH-SSR11                        | 1 |
|        | RH050L05-3-51824  |          | 5 | 42-47 | Y-1-NBS      | -2 | 12040 | 12194 | E=4.25945e-38  |                                  |   |
|        | RH050L05-3-51824  |          | 5 | 42-47 | N-Nt-LRR     | -3 | 13446 | 13509 | E=2.69541e-08  |                                  |   |
|        | RH050L05-3-51824  |          | 5 | 42-47 | N-Nt-LRR     | -2 | 13715 | 13952 | E=1.35542e-48  |                                  |   |
|        | RH050L05-3-51824  |          | 5 | 42-47 | Bs4-LRR      | -3 | 13951 | 14028 | E=3.8898e-18   |                                  |   |
|        | RH050L05-3-51824  |          | 5 | 42-47 | Bs4-CNL      | -1 | 14080 | 14111 | E=6.16256e-07  |                                  |   |
|        | RH059F14-1-103260 | AC238071 | 5 | 42-47 | Bs4-TIR      | 2  | 12457 | 12509 | E=4.67117e-17  | RGH-SSR16                        | 1 |
|        | RH059F14-1-103260 |          | 5 | 42-47 | Bs4-NBS      | 1  | 12778 | 12834 | E=2.78534e-09  |                                  |   |
|        | RH059F14-1-103260 |          | 5 | 42-47 | Y-1-NBS      | 3  | 14903 | 15033 | E=1.48437e-19  |                                  |   |
|        | RH059F14-1-103260 |          | 5 | 42-47 | Bs4-TIR      | -1 | 15048 | 15206 | E=1.60852e-68  |                                  | 1 |
|        | RH059F14-1-103260 |          | 5 | 42-47 | Rpp5-TIR     | -3 | 15286 | 15338 | E=0.0181302    |                                  |   |
|        | RH059F14-1-103260 |          | 5 | 42-47 | N-Nt-NBS     | -3 | 15290 | 15633 | E=1.02165e-128 |                                  |   |
|        | RH059F14-1-103260 |          | 5 | 42-47 | Y-1-NBS      | -2 | 15577 | 15672 | E=5.52195e-06  |                                  |   |
|        | RH059F14-1-103260 |          | 5 | 42-47 | Y-1-NBS      | -1 | 15737 | 15786 | E=1.70229e-07  |                                  |   |
|        | RH059F14-1-103260 |          | 5 | 42-47 | N-Nt-LRR     | -1 | 15744 | 15835 | E=1.78673e-16  |                                  |   |
|        | RH059F14-1-103260 |          | 5 | 42-47 | Bs4-CNL      | -2 | 16359 | 16521 | E=2.85167e-46  |                                  |   |
|        | RH105E10-7-17147  | AC238209 | 5 | 42-47 | Bs4-TIR      | -2 | 67    | 226   | E=1.1425e-68   | RGH-SSR29                        | 1 |
|        | RH105E10-7-17147  |          | 5 | 42-47 | Rpp5-TIR     | -1 | 269   | 321   | E=0.0100259    |                                  |   |
|        | RH105E10-7-17147  |          | 5 | 42-47 | N-Nt-NBS     | -1 | 273   | 617   | E=4.73885e-131 |                                  |   |
|        | RH105E10-7-17147  |          | 5 | 42-47 | Bs4-TIR      | -2 | 900   | 957   | E=4.4829e-15   |                                  | 1 |
|        | RH105E10-7-17147  |          | 5 | 42-47 | Y-1-LRR      | -3 | 1094  | 1357  | E=3.15382e-65  |                                  |   |
|        | RH105E10-7-17147  |          | 5 | 42-47 | Y-1-NBS      | 3  | 3060  | 3190  | E=3.50472e-20  |                                  | 1 |
|        | RH130M21-3-20094  | AC237863 | 5 | 42-47 | Bs4-TIR      | -3 | 812   | 971   | E=6.42428e-69  | BACend tool                      | 1 |
|        | RH130M21-3-20094  |          | 5 | 42-47 | N-Nt-NBS     | -2 | 1027  | 1371  | E=3.75156e-131 |                                  |   |
|        | RH130M21-3-20094  |          | 5 | 42-47 | Bs4-TIR      | 2  | 1053  | 1110  | E=5.75796e-15  |                                  | 1 |
|        | RH130M21-3-20094  |          | 5 | 42-47 | N-Nt-LRR     | -2 | 1782  | 1937  | E=1.92372e-49  |                                  |   |
|        | RH130M21-3-20094  |          | 5 | 42-47 | Y-1-LRR      | -1 | 1851  | 2114  | E=3.20689e-65  |                                  |   |
|        | RH130M21-3-20094  |          | 5 | 42-47 | Bs4-CNL      | -1 | 2067  | 2228  | E=2.20238e-45  |                                  |   |
|        | RH130M21-3-20094  |          | 5 | 42-47 | Y-1-NBS      | 3  | 3216  | 3346  | E=3.50472e-20  |                                  | 1 |
|        | RH162G20-6-4916   | AC238310 | 5 | 42-47 | N-Nt-TIR     | 2  | 112   | 182   | E=9.54949e-21  | RGH-SSR44                        | 1 |
|        | RH162G20-6-4916   |          | 5 | 42-47 | N-Nt-NBS     | 1  | 191   | 452   | E=6.18673e-46  |                                  |   |
|        | RH162G20-4-6756   |          | 5 | 42-47 | CaMi-LRR     | -3 | 6     | 110   | E=1.54507e-10  |                                  | 1 |
|        | RH162G20-4-6756   |          | 5 | 42-47 | CaMi-LRR     | -2 | 87    | 152   | E=0.000377949  |                                  |   |
|        | RH188F23-3-5294   | AC237893 | 5 | 42-47 | Bs4-TIR      | 2  | 32    | 118   | E=6.78788e-23  | BACend tool                      | 1 |
|        | RH188F23-3-5294   |          | 5 | 42-47 | N-Nt-NBS     | 1  | 127   | 244   | E=2.88553e-29  |                                  |   |
|        | RH188F23-3-5294   |          | 5 | 42-47 | N-Nt-NBS     | 3  | 227   | 383   | E=1.18709e-42  |                                  |   |
|        | RH188F23-4-10707  |          | 5 | 42-47 | N-Nt-LRR     | 2  | 625   | 688   | E=2.76373e-08  |                                  | 1 |
|        | RH188F23-4-10707  |          | 5 | 42-47 | N-Nt-LRR     | 1  | 868   | 1105  | E=1.58826e-48  |                                  |   |
|        | RH188F23-4-10707  |          | 5 | 42-47 | Bs4-LRR      | 2  | 1130  | 1207  | E=6.97561e-18  |                                  |   |
|        | RH188F23-4-10707  |          | 5 | 42-47 | Bs4-CNL      | 3  | 1206  | 1237  | E=7.22122e-07  |                                  |   |
|        | RH188F23-7-43852  |          | 5 | 42-47 | N-Nt-LRR     | -1 | 5801  | 6028  | E=2.57688e-48  |                                  | 1 |
|        | RH188F23-7-43852  |          | 5 | 42-47 | Y-1-LRR      | -2 | 6014  | 6148  | E=1.85496e-25  |                                  |   |
|        | RH188F23-7-43852  |          | 5 | 42-47 | N-Nt-CNL     | -3 | 6209  | 6325  | E=7.51326e-17  |                                  |   |
|        | RH149N09-1-114425 | AC238277 | 5 | 45-46 | Bs4-TIR      | 3  | 7226  | 7382  | E=3.29177e-73  | potato physical map              | 1 |
|        | RH149N09-1-114425 |          | 5 | 45-46 | Bs4-NBS      | 2  | 7495  | 7863  | E=5.7527e-155  |                                  |   |
|        | RH149N09-1-114425 |          | 5 | 45-46 | N-Nt-LRR     | 1  | 7909  | 8019  | E=5.83766e-19  |                                  |   |
|        | RH149N09-1-114425 |          | 5 | 45-46 | Y-1-LRR      | 2  | 8409  | 8762  | E=4.72858e-107 |                                  |   |
|        | RH149N09-1-114425 |          | 5 | 45-46 | N-Nt-CNL     | 2  | 8709  | 8856  | E=1.24727e-52  |                                  |   |
|        | RH186A15-1-25421  | AC240056 | 5 | 46    | N-Nt-NBS     | -2 | 13    | 72    | E=3.9759e-17   | potato physical map              | 1 |
|        | RH186A15-1-25421  |          | 5 | 46    | P2-LRR       | -2 | 339   | 446   | E=0.000467581  |                                  |   |
|        | RH186A15-1-25421  |          | 5 | 46    | Bs4-TIR      | -2 | 801   | 962   | E=3.76081e-74  |                                  | 1 |
|        | RH186A15-1-25421  |          | 5 | 46    | Bs4-NBS      | -1 | 1048  | 1403  | E=4.82809e-155 |                                  |   |
|        | RH186A15-1-25421  |          | 5 | 46    | P2-NBS       | -2 | 1544  | 1595  | E=0.0303327    |                                  |   |
|        | RH186A15-1-25421  |          | 5 | 46    | N-Nt-LRR     | -2 | 1666  | 2065  | E=2.52235e-93  |                                  |   |
|        | RH186A15-1-25421  |          | 5 | 46    | N-Nt-CNL     | -3 | 2016  | 2158  | E=4.27468e-34  |                                  |   |
|        | RH196D19-4-72386  | AC238396 | 5 | 46    | Bs4-TIR      | -1 | 12097 | 12256 | E=9.50351e-71  | BACend tool                      | 1 |
|        | RH196D19-4-72386  |          | 5 | 46    | Bs4-NBS      | -1 | 12313 | 12680 | E=3.03378e-146 |                                  |   |
|        | RH196D19-4-72386  |          | 5 | 46    | N-Nt-LRR     | -3 | 12713 | 12814 | E=4.25642e-15  |                                  |   |
|        | RH196D19-4-72386  |          | 5 | 46    | Y-1-LRR      | -2 | 14607 | 15015 | E=2.18458e-94  |                                  |   |
|        | RH196D19-4-72386  |          | 5 | 46    | N-Nt-CNL     | -2 | 14957 | 15108 | E=8.11042e-41  |                                  |   |
| Ve-CNL | RH189F04-3-28234  | AC238378 | 5 | 42-47 | R3a-CC       | 2  | 5139  | 5283  | E=9.54655e-47  | NBS profiling 2H34               | 1 |
|        | RH189F04-3-28234  |          | 5 | 42-47 | R3a-NBS      | 2  | 5284  | 5357  | E=2.49238e-28  |                                  |   |
|        | RH189F04-3-28234  |          | 5 | 42-47 | R3a-NBS      | 3  | 5309  | 5369  | E=4.74669e-22  |                                  |   |
|        | RH189F04-3-28234  |          | 5 | 42-47 | R3a-LRR      | 3  | 5370  | 5480  | E=2.71528e-42  |                                  |   |
|        | RH189F04-3-28234  |          | 5 | 42-47 | I2-LRR       | 1  | 5582  | 5821  | E=1.07549e-71  |                                  |   |
|        | RH189F04-3-28234  |          | 5 | 42-47 | Rpp1-b-LRR   | 1  | 6250  | 6489  | E=1.47959e-15  |                                  |   |
|        | RH040H22-1-23554  | AC238011 | 5 | 46    | I2-CC        | -2 | 6693  | 6857  | E=1.6126e-52   | potato physical map              | 1 |
|        | RH040H22-1-23554  |          | 5 | 46    | R3a-NBS      | -2 | 6859  | 6952  | E=1.22419e-34  |                                  |   |
|        | RH040H22-1-23554  |          | 5 | 46    | R3a-NBS      | -3 | 6971  | 7180  | E=7.32853e-78  |                                  |   |
|        | RH040H22-1-23554  |          | 5 | 46    | R3a-LRR      | -3 | 7181  | 7456  | E=1.97152e-110 |                                  |   |
|        | RH040H22-2-1074   |          | 5 | 46    | R3a-CC       | -3 | 1     | 113   | E=1.58594e-22  |                                  | 1 |
|        | RH040H22-2-1074   |          | 5 | 46    | R3a-NBS      | -3 | 75    | 357   | E=1.43588e-117 |                                  |   |
|        | RH040H22-5-31964  |          | 5 | 46    | R3a-LRR      | -3 | 1     | 641   | E=0.0          |                                  | 1 |
|        | RH040H22-5-31964  |          | 5 | 46    | R3a-LRR      | -1 | 4797  | 5200  | E=1.9471e-153  |                                  |   |
|        | RH040H22-5-31964  |          | 5 | 46    | Xa1-LRR      | -2 | 5239  | 5403  | E=9.69176e-05  |                                  |   |

|        |                   |          |   |       |              |    |       |       |                |                     |   |
|--------|-------------------|----------|---|-------|--------------|----|-------|-------|----------------|---------------------|---|
|        | RH040H22-5-31964  |          | 5 | 46    | R3a-CC       | -2 | 7269  | 7434  | E=7.61872e-48  |                     | 1 |
|        | RH040H22-5-31964  |          | 5 | 46    | R3a-NBS      | -2 | 7435  | 7815  | E=7.91459e-158 |                     |   |
|        | RH040H22-5-31964  |          | 5 | 46    | I2-LRR       | -2 | 7816  | 8457  | E=0.0          |                     |   |
|        | RH002J19-1-19079  | AC239958 | 5 |       | I2-CC        | 1  | 2520  | 2684  | E=9.10923e-66  | RGH-CAPS2 (SH)      | 1 |
|        | RH002J19-1-19079  |          | 5 |       | I2-NBS       | 1  | 2687  | 3063  | E=1.73241e-144 |                     |   |
|        | RH002J19-1-19079  |          | 5 |       | I2-LRR       | 1  | 3064  | 3831  | E=0.0          |                     |   |
|        | RH002J19-2-23027  |          | 5 |       | I2-CC        | 1  | 1906  | 1962  | E=1.11173e-11  |                     | 1 |
|        | RH002J19-2-23027  |          | 5 |       | I2-CC        | 2  | 2640  | 2806  | E=2.63141e-61  |                     |   |
|        | RH002J19-2-23027  |          | 5 |       | R3a-NBS      | 2  | 2807  | 3027  | E=1.75129e-94  |                     |   |
|        | RH002J19-2-23027  |          | 5 |       | R1-LRR       | 1  | 3012  | 3077  | E=0.0277046    |                     |   |
|        | RH002J19-2-23027  |          | 5 |       | R3a-LRR      | 1  | 3552  | 4186  | E=0.0          |                     |   |
|        | RH002J19-2-23027  |          | 5 |       | I2-LRR       | 2  | 4208  | 4288  | E=1.78369e-24  |                     |   |
|        | RH002J19-3-22397  |          | 5 |       | R3a-CC       | 3  | 1355  | 1460  | E=4.649e-25    |                     | 1 |
|        | RH002J19-3-22397  |          | 5 |       | R3a-CC       | 1  | 3054  | 3110  | E=1.56604e-08  |                     |   |
|        | RH002J19-3-22397  |          | 5 |       | I2-NBS       | 1  | 3113  | 3407  | E=2.7662e-84   |                     |   |
|        | RH002J19-3-22397  |          | 5 |       | R3a-LRR      | 3  | 3362  | 3547  | E=2.24166e-70  |                     |   |
|        | RH002J19-3-22397  |          | 5 |       | I2-LRR       | 2  | 3556  | 3637  | E=1.23175e-06  |                     | 1 |
|        | RH002J19-3-22397  |          | 5 |       | R3a-LRR      | 1  | 3682  | 4029  | E=4.37205e-97  |                     |   |
|        | RH002J19-4-22753  |          | 5 |       | I2-CC        | 2  | 4737  | 4901  | E=5.85367e-66  |                     | 1 |
|        | RH002J19-4-22753  |          | 5 |       | I2-NBS       | 2  | 4904  | 5280  | E=4.67455e-145 |                     |   |
|        | RH002J19-4-22753  |          | 5 |       | I2-LRR       | 2  | 5281  | 6048  | E=0.0          |                     |   |
|        | RH002J19-5-25682  |          | 5 |       | R3a-CC       | 3  | 4391  | 4555  | E=1.14336e-57  |                     | 1 |
|        | RH002J19-5-25682  |          | 5 |       | I2-NBS       | 3  | 4558  | 4725  | E=7.4623e-57   |                     |   |
|        | RH002J19-5-25682  |          | 5 |       | I2-NBS       | 1  | 4956  | 5165  | E=4.23462e-83  |                     |   |
|        | RH002J19-5-25682  |          | 5 |       | I2-LRR       | 1  | 5166  | 5910  | E=0.0          |                     |   |
| Vf-CNL | RH079N09-1-5438   | AC239998 | 5 | 44-46 | Dm3-LRR      | -3 | 28    | 189   | E=2.34635e-07  | RGH-CAPS14          | 1 |
|        | RH079N09-7-5477   |          | 5 | 44-46 | Dm3-NBS      | -2 | 581   | 895   | E=1.58746e-46  |                     | 1 |
|        | RH079N09-7-5477   |          | 5 | 44-46 | Dm3-LRR      | -2 | 946   | 1211  | E=4.72773e-08  |                     |   |
|        | RH079N09-7-5477   |          | 5 | 44-46 | Rps2-LRR     | -2 | 1431  | 1597  | E=4.40436e-05  |                     |   |
|        | RH178O02-2-65247  | AC238356 | 5 | 46    | Dm3-NBS      | -3 | 2961  | 3275  | E=7.54123e-53  | potato physical map | 1 |
|        | RH178O02-2-65247  |          | 5 | 46    | Rps2-LRR     | -3 | 3281  | 3626  | E=3.51392e-07  |                     |   |
|        | RH178O02-2-65247  |          | 5 | 46    | Rps2-LRR     | -2 | 6123  | 6262  | E=2.16518e-08  |                     |   |
| Vg-CNL | RH181H24-11-5867  | AC240052 | 5 | 60-62 | Rpi-blb2-NBS | -2 | 1     | 222   | E=5.91676e-56  | RGH-SSR46           | 1 |
|        | RH181H24-11-5867  |          | 5 | 60-62 | Mi-1-LRR     | -2 | 227   | 560   | E=9.75591e-56  |                     |   |
|        | RH181H24-4-27530  |          | 5 | 60-62 | Rpi-blb2-NBS | -3 | 7559  | 7624  | E=2.41559e-09  |                     | 1 |
|        | RH181H24-4-27530  |          | 5 | 60-62 | Rpi-blb2-LRR | -2 | 7661  | 7946  | E=1.28633e-51  |                     |   |
|        | RH181H24-6-39167  |          | 5 | 60-62 | Rpi-blb2-CC  | -3 | 239   | 507   | E=1.6145e-71   |                     | 1 |
|        | RH181H24-6-39167  |          | 5 | 60-62 | Rpi-blb2-NBS | -3 | 508   | 844   | E=6.02778e-107 |                     |   |
|        | RH181H24-6-39167  |          | 5 | 60-62 | CaMi-LRR     | -2 | 948   | 1111  | E=1.16641e-30  |                     |   |
|        | RH181H24-6-39167  |          | 5 | 60-62 | Rpi-blb2-NBS | -1 | 9225  | 9246  | E=0.00896792   |                     | 1 |
|        | RH181H24-6-39167  |          | 5 | 60-62 | CaMi-LRR     | -1 | 9249  | 9301  | E=3.09182e-06  |                     |   |
|        | RH181H24-8-25779  |          | 5 | 60-62 | Rpi-blb2-CC  | -2 | 3068  | 3595  | E=8.61448e-109 |                     | 1 |
|        | RH181H24-8-25779  |          | 5 | 60-62 | Rpi-blb2-NBS | -3 | 3520  | 3870  | E=5.13961e-110 |                     |   |
|        | RH181H24-8-25779  |          | 5 | 60-62 | Mi-1-LRR     | -3 | 3875  | 4208  | E=9.75591e-56  |                     |   |
|        | RH181H24-8-25779  |          | 5 | 60-62 | Rpi-blb2-NBS | 3  | 6591  | 6863  | E=8.39455e-87  |                     | 1 |
|        | RH181H24-8-25779  |          | 5 | 60-62 | CaMi-LRR     | 1  | 6889  | 7143  | E=3.6091e-48   |                     |   |
|        | RH181H24-8-25779  |          | 5 | 60-62 | Rpi-blb2-LRR | 3  | 7171  | 7228  | E=0.00285771   |                     |   |
|        | RH181H24-8-25779  |          | 5 | 60-62 | Prf-CC       | -2 | 6702  | 6871  | E=3.83401e-08  |                     | 1 |
|        | RH181H24-8-25779  |          | 5 | 60-62 | Rpi-blb2-NBS | -2 | 6865  | 7217  | E=5.14856e-104 |                     |   |
|        | RH181H24-8-25779  |          | 5 | 60-62 | CaMi-LRR     | -2 | 7222  | 7551  | E=1.78237e-64  |                     |   |
|        | RH181H24-9-4783   |          | 5 | 60-62 | CaMi-LRR     | -2 | 237   | 452   | E=2.93896e-37  |                     | 1 |
|        | RH001G02-2-7308   | AC239956 | 5 | 65-67 | Rpi-blb2-CC  | -3 | 4     | 303   | E=2.32593e-78  | BACend tool         | 1 |
|        | RH001G02-2-7308   |          | 5 | 65-67 | Rpi-blb2-NBS | -3 | 305   | 664   | E=2.34385e-113 |                     |   |
|        | RH001G02-2-7308   |          | 5 | 65-67 | Mi-1-LRR     | -3 | 669   | 1000  | E=1.7166e-63   |                     |   |
|        | RH001G02-2-7308   |          | 5 | 65-67 | CaMi-CC      | -2 | 1186  | 1275  | E=7.74166e-17  |                     | 1 |
|        | RH001G02-2-7308   |          | 5 | 65-67 | Rpi-blb2-NBS | -2 | 1266  | 1391  | E=1.48747e-41  |                     |   |
|        | RH001G02-2-7308   |          | 5 | 65-67 | CaMi-LRR     | -1 | 1478  | 1613  | E=7.59338e-15  |                     |   |
|        | RH001G02-2-7308   |          | 5 | 65-67 | CaMi-LRR     | -2 | 1623  | 1670  | E=4.42364e-08  |                     |   |
|        | RH001G02-3-6061   |          | 5 | 65-67 | CaMi-CC      | 1  | 92    | 333   | E=9.28477e-52  |                     | 1 |
|        | RH001G02-3-6061   |          | 5 | 65-67 | Rpi-blb2-CC  | 3  | 318   | 491   | E=2.59935e-40  |                     |   |
|        | RH001G02-3-6061   |          | 5 | 65-67 | Rpi-blb2-NBS | 3  | 492   | 828   | E=3.85247e-97  |                     |   |
|        | RH001G02-3-6061   |          | 5 | 65-67 | Mi-1-LRR     | 3  | 833   | 1161  | E=1.91493e-60  |                     |   |
|        | RH001G02-4-8367   |          | 5 | 65-67 | Rpi-blb2-CC  | -2 | 626   | 891   | E=1.28884e-71  |                     | 1 |
|        | RH001G02-4-8367   |          | 5 | 65-67 | Rpi-blb2-NBS | -2 | 893   | 1248  | E=4.93675e-105 |                     |   |
|        | RH001G02-4-8367   |          | 5 | 65-67 | CaMi-LRR     | -2 | 1271  | 1578  | E=2.87528e-55  |                     |   |
|        | RH001G02-7-7272   |          | 5 | 65-67 | Rpi-blb2-CC  | 2  | 674   | 919   | E=4.90927e-34  |                     | 1 |
|        | RH001G02-7-7272   |          | 5 | 65-67 | Rpi-blb2-CC  | 1  | 885   | 1087  | E=1.23089e-57  |                     |   |
|        | RH001G02-7-7272   |          | 5 | 65-67 | CaMi-CC      | 3  | 1140  | 1223  | E=4.31697e-17  |                     |   |
|        | RH001G02-7-7272   |          | 5 | 65-67 | Rpi-blb2-NBS | 3  | 1214  | 1401  | E=3.05623e-61  |                     |   |
|        | RH001G02-8-12598  |          | 5 | 65-67 | CaMi-CC      | 2  | 1     | 401   | E=5.31263e-107 |                     | 1 |
|        | RH001G02-8-12598  |          | 5 | 65-67 | Rpi-blb2-NBS | 2  | 392   | 744   | E=2.24873e-112 |                     |   |
|        | RH001G02-8-12598  |          | 5 | 65-67 | Mi-1-LRR     | 2  | 749   | 1080  | E=9.48994e-65  |                     |   |
|        | RH009O14-10-10466 |          | 5 | 65-67 | Rpi-blb2-CC  | -1 | 19    | 278   | E=5.59544e-72  | potato physical map | 1 |
|        | RH009O14-10-10466 |          | 5 | 65-67 | Rpi-blb2-NBS | -1 | 2249  | 2598  | E=5.97942e-106 |                     |   |
|        | RH009O14-10-10466 |          | 5 | 65-67 | Mi-1-LRR     | -1 | 2603  | 2937  | E=5.42757e-64  |                     |   |
|        | RH009O14-11-14017 |          | 5 | 65-67 | Rpi-blb2-CC  | -2 | 2111  | 2622  | E=2.05575e-101 |                     | 1 |
|        | RH009O14-11-14017 |          | 5 | 65-67 | Rpi-blb2-NBS | -2 | 2623  | 2969  | E=3.9364e-109  |                     |   |
|        | RH009O14-11-14017 |          | 5 | 65-67 | Mi-1-LRR     | -2 | 2974  | 3305  | E=1.26028e-64  |                     |   |
|        | RH009O14-2-11912  |          | 5 | 65-67 | Rpi-blb2-CC  | -3 | 3508  | 3724  | E=3.73392e-57  |                     | 1 |
|        | RH009O14-4-54005  |          | 5 | 65-67 | Rpi-blb2-CC  | 3  | 5778  | 6092  | E=2.24697e-82  |                     | 1 |
|        | RH009O14-4-54005  |          | 5 | 65-67 | Mi-1-NBS     | 1  | 6068  | 6148  | E=4.1034e-09   |                     |   |
|        | RH009O14-4-54005  |          | 5 | 65-67 | CaMi-LRR     | 2  | 6210  | 6394  | E=2.49086e-32  |                     |   |
|        | RH009O14-4-54005  |          | 5 | 65-67 | Rpi-blb2-CC  | -2 | 13122 | 13644 | E=1.5162e-115  |                     | 1 |
|        | RH009O14-4-54005  |          | 5 | 65-67 | Rpi-blb2-NBS | -2 | 13645 | 13994 | E=1.3848e-115  |                     |   |
|        | RH009O14-4-54005  |          | 5 | 65-67 | CaMi-LRR     | -2 | 13999 | 14329 | E=7.35385e-68  |                     |   |
|        | RH009O14-4-54005  |          | 5 | 65-67 | Rpi-blb2-NBS | 3  | 15529 | 15573 | E=2.06206e-08  |                     | 1 |
|        | RH009O14-4-54005  |          | 5 | 65-67 | Hero-LRR     | 2  | 15656 | 15791 | E=1.97246e-18  |                     |   |
|        | RH009O14-6-8476   |          | 5 | 65-67 | CaMi-LRR     | -3 | 1511  | 1726  | E=1.35268e-37  |                     | 1 |
|        | RH009O14-9-5164   |          | 5 | 65-67 | Rpi-blb2-NBS | -1 | 975   | 1074  | E=5.78761e-17  |                     | 1 |
|        | RH045N13-2-26239  | AC239979 | 5 | 65-67 | CaMi-CC      | 2  | 34    | 172   | E=9.89758e-33  | BACend tool         | 1 |
|        | RH045N13-2-26239  |          | 5 | 65-67 | Rpi-blb2-CC  | 1  | 159   | 412   | E=1.3457e-66   |                     |   |
|        | RH045N13-2-26239  |          | 5 | 65-67 | Rpi-blb2-NBS | 2  | 788   | 1132  | E=1.01846e-110 |                     |   |
|        | RH045N13-2-26239  |          | 5 | 65-67 | CaMi-LRR     | 2  | 1127  | 1421  | E=7.56214e-58  |                     |   |
|        | RH045N13-3-27148  |          | 5 | 65-67 | Rpi-blb2-CC  | 2  | 1112  | 1622  | E=9.68189e-109 |                     | 1 |
|        | RH045N13-3-27148  |          | 5 | 65-67 | Rpi-blb2-NBS | 2  | 1624  | 1976  | E=2.03684e-108 |                     |   |
|        | RH045N13-3-27148  |          | 5 | 65-67 | Mi-1-LRR     | 2  | 1981  | 2313  | E=5.08742e-57  |                     |   |
|        | RH045N13-3-27148  |          | 5 | 65-67 | Rpi-blb2-LRR | 1  | 6767  | 6818  | E=0.0019796    |                     |   |
|        | RH045N13-3-27148  |          | 5 | 65-67 | Rpi-blb2-NBS | 1  | 6888  | 7041  | E=4.61485e-21  |                     | 1 |

|         |                  |          |   |       |              |    |       |       |                |                     |   |
|---------|------------------|----------|---|-------|--------------|----|-------|-------|----------------|---------------------|---|
|         | RH045N13-4-16064 |          | 5 | 65-67 | Rpi-blb2-CC  | 2  | 763   | 1287  | E=4.37227e-117 |                     | 1 |
|         | RH045N13-4-16064 |          | 5 | 65-67 | Rpi-blb2-NBS | 2  | 1288  | 1640  | E=7.22973e-113 |                     |   |
|         | RH045N13-4-16064 |          | 5 | 65-67 | Mi-1-LRR     | 2  | 1645  | 1980  | E=3.25881e-68  |                     |   |
|         | RH045N13-5-18489 |          | 5 | 65-67 | Rpi-blb2-CC  | -1 | 2575  | 3097  | E=3.10914e-113 |                     | 1 |
|         | RH045N13-5-18489 |          | 5 | 65-67 | Rpi-blb2-NBS | -1 | 3098  | 3451  | E=3.35445e-114 |                     |   |
|         | RH045N13-5-18489 |          | 5 | 65-67 | Mi-1-LRR     | -1 | 3456  | 3788  | E=4.63321e-63  |                     |   |
|         | RH051N09-1-30687 | AC239982 | 5 | 65-67 | Rpi-blb2-CC  | -2 | 1991  | 2365  | E=1.34444e-98  | RGH-SSR12           | 1 |
|         | RH051N09-1-30687 |          | 5 | 65-67 | Rpi-blb2-NBS | -2 | 2368  | 2452  | E=1.06205e-23  |                     |   |
|         | RH051N09-1-30687 |          | 5 | 65-67 | Rpi-blb2-NBS | -3 | 2397  | 2671  | E=1.02118e-72  |                     |   |
|         | RH051N09-1-30687 |          | 5 | 65-67 | Mi-1-LRR     | -3 | 2676  | 3005  | E=6.30164e-67  |                     |   |
|         | RH051N09-1-30687 |          | 5 | 65-67 | Rpi-blb2-CC  | -1 | 8449  | 8968  | E=1.53067e-111 |                     | 1 |
|         | RH051N09-1-30687 |          | 5 | 65-67 | Rpi-blb2-NBS | -1 | 8969  | 9322  | E=3.44147e-112 |                     |   |
|         | RH051N09-1-30687 |          | 5 | 65-67 | CaMi-LRR     | -1 | 9327  | 9658  | E=2.86862e-63  |                     |   |
|         | RH051N09-1-30687 |          | 5 | 65-67 | Rpi-blb2-NBS | 3  | 9264  | 9600  | E=3.33913e-101 |                     | 1 |
|         | RH051N09-2-37554 |          | 5 | 65-67 | CaMi-LRR     | -1 | 3447  | 3479  | E=0.00186016   |                     | 1 |
|         | RH051N09-2-37554 |          | 5 | 65-67 | Rpi-blb2-CC  | -3 | 6221  | 6728  | E=2.40123e-112 |                     | 1 |
|         | RH051N09-2-37554 |          | 5 | 65-67 | Rpi-blb2-NBS | -3 | 6729  | 7082  | E=1.4597e-106  |                     |   |
|         | RH051N09-2-37554 |          | 5 | 65-67 | CaMi-LRR     | -3 | 7087  | 7416  | E=8.3343e-68   |                     |   |
|         | RH051N09-3-39678 |          | 5 | 65-67 | Rpi-blb2-CC  | 3  | 6917  | 7390  | E=4.88735e-107 |                     | 1 |
|         | RH051N09-3-39678 |          | 5 | 65-67 | Rpi-blb2-NBS | 3  | 7391  | 7740  | E=2.21601e-105 |                     |   |
|         | RH051N09-3-39678 |          | 5 | 65-67 | R1-LRR       | 3  | 7613  | 7869  | E=8.37744e-13  |                     |   |
|         | RH051N09-3-39678 |          | 5 | 65-67 | CaMi-LRR     | 2  | 7788  | 7955  | E=7.19542e-28  |                     |   |
|         | RH051N09-3-39678 |          | 5 | 65-67 | CaMi-LRR     | 3  | 8775  | 8932  | E=5.19979e-26  |                     |   |
|         | RH051N09-3-39678 |          | 5 | 65-67 | Rpi-blb2-CC  | 1  | 10910 | 11428 | E=6.3227e-111  |                     | 1 |
|         | RH051N09-3-39678 |          | 5 | 65-67 | Rpi-blb2-NBS | 1  | 11429 | 11784 | E=3.32947e-111 |                     |   |
|         | RH051N09-3-39678 |          | 5 | 65-67 | CaMi-LRR     | 1  | 11789 | 12123 | E=1.36392e-66  |                     |   |
|         | RH051N09-7-14106 |          | 5 | 65-67 | Rpi-blb2-CC  | 1  | 2825  | 3341  | E=2.51881e-91  |                     | 1 |
|         | RH051N09-7-14106 |          | 5 | 65-67 | Rpi-blb2-NBS | 2  | 3313  | 3446  | E=1.23623e-46  |                     |   |
|         | RH051N09-7-14106 |          | 5 | 65-67 | Rpi-blb2-NBS | 1  | 3485  | 3644  | E=5.40572e-51  |                     |   |
|         | RH051N09-7-14106 |          | 5 | 65-67 | R1-LRR       | 1  | 3557  | 3635  | E=0.000130669  |                     |   |
|         | RH085B11-2-20197 | AC234535 | 5 | 65-67 | Rpi-blb2-CC  | -1 | 3364  | 3884  | E=1.03262e-116 | BACend tool         | 1 |
|         | RH085B11-2-20197 |          | 5 | 65-67 | Rpi-blb2-NBS | -1 | 3885  | 4222  | E=7.80484e-108 |                     |   |
|         | RH085B11-2-20197 |          | 5 | 65-67 | CaMi-LRR     | -3 | 4211  | 4484  | E=4.75451e-47  |                     |   |
|         | RH085B11-3-6911  |          | 5 | 65-67 | Rpi-blb2-CC  | -2 | 404   | 937   | E=5.1663e-117  |                     | 1 |
|         | RH085B11-3-6911  |          | 5 | 65-67 | Rpi-blb2-NBS | -2 | 938   | 1296  | E=1.0794e-111  |                     |   |
|         | RH085B11-3-6911  |          | 5 | 65-67 | Mi-1-LRR     | -2 | 1301  | 1639  | E=3.37039e-67  |                     |   |
| Via-CNL | RH015L03-1-16922 | AC237944 | 6 | 1-15  | Rpi-blb2-CC  | -3 | 1368  | 1487  | E=9.84098e-24  | RGH-SSR5            | 1 |
|         | RH015L03-1-16922 |          | 6 | 1-15  | Rpi-blb2-NBS | -3 | 1500  | 1575  | E=7.9239e-27   |                     |   |
|         | RH015L03-1-16922 |          | 6 | 1-15  | Rpi-blb2-NBS | -1 | 1568  | 1634  | E=5.24075e-14  |                     |   |
|         | RH015L03-3-22311 |          | 6 | 1-15  | Rpi-blb2-CC  | 2  | 655   | 764   | E=6.99595e-21  |                     | 1 |
|         | RH015L03-3-22311 |          | 6 | 1-15  | Rpi-blb2-NBS | 1  | 764   | 844   | E=2.79973e-81  |                     |   |
|         | RH015L03-3-22311 |          | 6 | 1-15  | Rpi-blb2-NBS | 2  | 860   | 925   | E=9.6365e-14   |                     |   |
|         | RH015L03-6-8827  |          | 6 | 1-15  | Rpi-blb2-CC  | 1  | 881   | 929   | E=1.31183e-10  |                     | 1 |
|         | RH015L03-6-8827  |          | 6 | 1-15  | Rpi-blb2-CC  | 2  | 919   | 991   | E=2.10703e-16  |                     |   |
|         | RH015L03-6-8827  |          | 6 | 1-15  | Rpi-blb2-NBS | 3  | 993   | 1192  | E=3.55894e-25  |                     |   |
|         | RH015L03-6-8827  |          | 6 | 1-15  | Mi-1-LRR     | 2  | 1257  | 1397  | E=3.18399e-33  |                     |   |
|         | RH086N05-2-6659  | AC238154 | 6 | 2     | CaMi-CC      | -1 | 371   | 958   | E=0.0          | RGH-SSR23           | 1 |
|         | RH086N05-2-6659  |          | 6 | 2     | Rpi-blb2-NBS | -1 | 949   | 1303  | E=8.19972e-168 |                     |   |
|         | RH086N05-2-6659  |          | 6 | 2     | Rpi-blb2-LRR | -1 | 1304  | 1661  | E=1.0609e-140  |                     |   |
|         | RH086N05-3-24570 |          | 6 | 2     | CaMi-CC      | -3 | 1811  | 2399  | E=0.0          |                     | 1 |
|         | RH086N05-3-24570 |          | 6 | 2     | Rpi-blb2-NBS | -3 | 2390  | 2746  | E=2.81412e-173 |                     |   |
|         | RH086N05-3-24570 |          | 6 | 2     | Rpi-blb2-LRR | -3 | 2748  | 2913  | E=1.54014e-63  |                     |   |
|         | RH086N05-3-24570 |          | 6 | 2     | Rpi-blb2-LRR | -1 | 4203  | 4372  | E=1.04468e-78  |                     |   |
|         | RH086N05-5-45462 |          | 6 | 2     | CaMi-CC      | -1 | 1664  | 2248  | E=0.0          |                     | 1 |
|         | RH086N05-5-45462 |          | 6 | 2     | Rpi-blb2-NBS | -1 | 2239  | 2585  | E=4.95908e-147 |                     |   |
|         | RH086N05-5-45462 |          | 6 | 2     | Mi-1-LRR     | -1 | 2586  | 2946  | E=1.37876e-157 |                     |   |
|         | RH086N05-5-45462 |          | 6 | 2     | Rpi-blb2-CC  | -3 | 9874  | 10462 | E=0.0          |                     | 1 |
|         | RH086N05-5-45462 |          | 6 | 2     | Rpi-blb2-NBS | -3 | 10463 | 10817 | E=0.0          |                     |   |
|         | RH086N05-5-45462 |          | 6 | 2     | Rpi-blb2-LRR | -3 | 10818 | 11178 | E=3.90675e-162 |                     |   |
|         | RH080A10-2-37145 | AC238125 | 6 | 3-15  | Rpi-blb2-CC  | 2  | 1599  | 1927  | E=3.45711e-150 | RGH-SSR21           | 1 |
|         | RH080A10-2-37145 |          | 6 | 3-15  | Rpi-blb2-NBS | 2  | 1928  | 2282  | E=5.25548e-177 |                     |   |
|         | RH080A10-2-37145 |          | 6 | 3-15  | Rpi-blb2-LRR | 2  | 2283  | 2643  | E=1.80072e-157 |                     |   |
|         | RH080A10-2-37145 |          | 6 | 3-15  | Rpi-blb2-CC  | 1  | 5607  | 5916  | E=6.86647e-143 |                     | 1 |
|         | RH080A10-2-37145 |          | 6 | 3-15  | Rpi-blb2-NBS | 1  | 5917  | 6270  | E=2.61054e-173 |                     |   |
|         | RH080A10-2-37145 |          | 6 | 3-15  | Rpi-blb2-LRR | 1  | 6271  | 6631  | E=2.49326e-157 |                     |   |
|         | RH080A10-3-25546 |          | 6 | 3-15  | Prf-CC       | 3  | 40    | 233   | E=6.98923e-09  |                     | 1 |
|         | RH080A10-3-25546 |          | 6 | 3-15  | I2-NBS       | 3  | 198   | 538   | E=9.0804e-42   |                     |   |
|         | RH080A10-3-25546 |          | 6 | 3-15  | Hero-LRR     | 3  | 584   | 930   | E=2.16443e-43  |                     |   |
|         | RH080A10-3-25546 |          | 6 | 3-15  | CaMi-CC      | 3  | 2617  | 3194  | E=0.0          |                     | 1 |
|         | RH080A10-3-25546 |          | 6 | 3-15  | Rpi-blb2-NBS | 3  | 3185  | 3538  | E=2.3261e-168  |                     |   |
|         | RH080A10-3-25546 |          | 6 | 3-15  | Rpi-blb2-LRR | 3  | 3539  | 3899  | E=1.83102e-157 |                     |   |
|         | RH080A10-3-25546 |          | 6 | 3-15  | Hero-CC      | 3  | 4854  | 5370  | E=6.19795e-58  |                     | 1 |
|         | RH080A10-3-25546 |          | 6 | 3-15  | Sw-5-NBS     | 3  | 5360  | 5690  | E=1.64749e-74  |                     |   |
|         | RH080A10-3-25546 |          | 6 | 3-15  | Prf-LRR      | 3  | 5670  | 6083  | E=2.2783e-38   |                     |   |
|         | RH061F19-2-4835  | AC237844 | 6 | 3     | CaMi-NBS     | -3 | 644   | 724   | E=7.33808e-18  | BACend tool         | 1 |
|         | RH061F19-2-4835  |          | 6 | 3     | Mi-1-LRR     | -3 | 722   | 970   | E=6.19336e-98  |                     |   |
|         | RH061F19-2-4835  |          | 6 | 3     | Rpi-blb2-LRR | -1 | 945   | 1051  | E=1.84576e-43  |                     |   |
|         | RH061F19-4-30043 |          | 6 | 3     | CaMi-CC      | -2 | 2629  | 3182  | E=0.0          |                     | 1 |
|         | RH061F19-4-30043 |          | 6 | 3     | Rpi-blb2-NBS | -2 | 3173  | 3527  | E=1.2317e-145  |                     |   |
|         | RH061F19-4-30043 |          | 6 | 3     | Rpi-blb2-LRR | -2 | 3528  | 3875  | E=7.40851e-142 |                     |   |
|         | RH061F19-4-30043 |          | 6 | 3     | Rpi-blb2-CC  | -1 | 4780  | 4898  | E=1.41569e-35  |                     | 1 |
|         | RH061F19-4-30043 |          | 6 | 3     | CaMi-CC      | -3 | 8268  | 8827  | E=0.0          |                     |   |
|         | RH061F19-4-30043 |          | 6 | 3     | Rpi-blb2-NBS | -3 | 8818  | 9105  | E=4.32955e-126 |                     |   |
|         | RH061F19-5-60727 |          | 6 | 3     | Rpi-blb2-CC  | -3 | 2943  | 3002  | E=2.54688e-24  |                     | 1 |
|         | RH061F19-5-60727 |          | 6 | 3     | Rpi-blb2-CC  | -2 | 8065  | 8267  | E=2.01425e-85  |                     |   |
|         | RH061F19-5-60727 |          | 6 | 3     | Prf-CC       | -1 | 9963  | 10067 | E=0.485284     |                     |   |
|         | RH061F19-5-60727 |          | 6 | 3     | Rpi-blb2-NBS | -3 | 10087 | 10433 | E=1.32352e-156 |                     |   |
|         | RH061F19-5-60727 |          | 6 | 3     | Rpi-blb2-CC  | -1 | 16245 | 16724 | E=2.13561e-171 |                     | 1 |
|         | RH061F19-5-60727 |          | 6 | 3     | Rpi-blb2-NBS | -2 | 16736 | 17091 | E=4.30577e-145 |                     |   |
|         | RH061F19-5-60727 |          | 6 | 3     | CaMi-LRR     | -3 | 17316 | 17581 | E=2.37773e-106 |                     |   |
|         | RH061F19-6-18325 |          | 6 | 3     | CaMi-CC      | -2 | 1376  | 1935  | E=0.0          |                     | 1 |
|         | RH061F19-6-18325 |          | 6 | 3     | Rpi-blb2-NBS | -2 | 1926  | 2279  | E=3.13038e-151 |                     |   |
|         | RH061F19-6-18325 |          | 6 | 3     | Rpi-blb2-LRR | -2 | 2280  | 2640  | E=6.64311e-144 |                     |   |
|         | RH061F19-6-18325 |          | 6 | 3     | Rpi-blb2-CC  | -1 | 4238  | 4447  | E=1.42383e-44  |                     | 1 |
|         | RH061F19-6-18325 |          | 6 | 3     | Rpi-blb2-CC  | -3 | 4377  | 4621  | E=1.21635e-98  |                     |   |
|         | RH148L18-2-29469 | AC238274 | 6 | 3     | Rpi-blb2-LRR | 3  | 611   | 689   | E=5.69371e-14  | potato physical map | 1 |
|         | RH148L18-2-29469 |          | 6 | 3     | CaMi-CC      | 1  | 2071  | 2630  | E=0.0          |                     | 1 |
|         | RH148L18-2-29469 |          | 6 | 3     | Rpi-blb2-NBS | 1  | 2621  | 2908  | E=1.71532e-125 |                     |   |

|                   |          |   |                    |    |       |       |                |   |
|-------------------|----------|---|--------------------|----|-------|-------|----------------|---|
| RH148L18-2-29469  | 6        | 3 | Rpi-blb2-LRR       | 1  | 3961  | 4201  | E=5.46477e-98  |   |
| RH148L18-2-29469  | 6        | 3 | Rpi-blb2-LRR       | 2  | 4116  | 4222  | E=5.32572e-43  |   |
| RH148L18-3-29918  | 6        | 3 | CaMi-CC            | -1 | 2421  | 2980  | E=0.0          |   |
| RH148L18-3-29918  | 6        | 3 | Rpi-blb2-NBS       | -1 | 2971  | 3324  | E=3.57642e-152 | 1 |
| RH148L18-3-29918  | 6        | 3 | Rpi-blb2-LRR       | -1 | 3325  | 3685  | E=6.11132e-144 |   |
| RH148L18-3-29918  | 6        | 3 | Rpi-blb2-CC        | -2 | 5425  | 5669  | E=3.01932e-99  |   |
| RH148L18-3-29918  | 6        | 3 | M-NBS              | -1 | 6885  | 7107  | E=6.5675e-11   | 1 |
| RH148L18-3-29918  | 6        | 3 | Mi-1-LRR           | -3 | 8045  | 8259  | E=6.11741e-83  |   |
| RH148L18-3-29918  | 6        | 3 | Rpi-blb2-CC        | -3 | 8727  | 8917  | E=2.04458e-91  | 1 |
| RH148L18-3-29918  | 6        | 3 | Hero-CC            | -3 | 9201  | 9316  | E=1.76294e-20  |   |
| RH148L18-4-3107   | 6        | 3 | Rpi-blb2-CC        | -3 | 105   | 223   | E=6.35659e-35  |   |
| RH160J08-1-42784  | AC240042 | 6 | 3-5 CaMi-CC        | 3  | 3268  | 3835  | E=0.0          | 1 |
| RH160J08-1-42784  |          | 6 | 3-5 Rpi-blb2-NBS   | 3  | 3826  | 4173  | E=1.05082e-146 |   |
| RH160J08-1-42784  |          | 6 | 3-5 Rpi-blb2-LRR   | 3  | 4174  | 4342  | E=2.27439e-71  |   |
| RH160J08-1-42784  |          | 6 | 3-5 Rpi-blb2-CC    | 1  | 5309  | 5616  | E=3.5339e-103  | 1 |
| RH160J08-1-42784  |          | 6 | 3-5 Mi-1-CC        | 2  | 5608  | 6043  | E=0.0          |   |
| RH160J08-1-42784  |          | 6 | 3-5 Rpi-blb2-NBS   | 1  | 6193  | 6346  | E=2.32872e-49  |   |
| RH160J08-1-42784  |          | 6 | 3-5 Mi-1-LRR       | 1  | 6513  | 6676  | E=1.20809e-66  |   |
| RH160J08-1-42784  |          | 6 | 3-5 Sw-5-CC        | 2  | 11537 | 11860 | E=9.77342e-21  | 1 |
| RH160J08-1-42784  |          | 6 | 3-5 Rpi-blb2-NBS   | 2  | 11877 | 12221 | E=2.60164e-156 |   |
| RH160J08-1-42784  |          | 6 | 3-5 Mi-1-LRR       | 2  | 12222 | 12582 | E=1.34468e-157 |   |
| RH160J08-2-49247  |          | 6 | 3-5 Mi-1-CC        | -3 | 10445 | 10666 | E=5.13183e-84  | 1 |
| RH160J08-2-49247  |          | 6 | 3-5 Rpi-blb2-CC    | -1 | 12308 | 12487 | E=2.22071e-65  |   |
| RH160J08-2-49247  |          | 6 | 3-5 Rpi-blb2-CC    | -3 | 12477 | 12850 | E=5.19936e-95  |   |
| RH160J08-2-49247  |          | 6 | 3-5 R1-NBS         | -3 | 12855 | 13053 | E=1.89738e-44  |   |
| RH160J08-2-49247  |          | 6 | 3-5 Mi-1-LRR       | -2 | 13403 | 13573 | E=2.20612e-61  |   |
| RH160J08-2-49247  |          | 6 | 3-5 Rpi-blb2-NBS   | -3 | 14872 | 15225 | E=6.79939e-152 | 1 |
| RH160J08-2-49247  |          | 6 | 3-5 Rpi-blb2-LRR   | -3 | 15226 | 15394 | E=2.08036e-62  |   |
| RH160J08-3-18915  |          | 6 | 3-5 Mi-1-LRR       | 1  | 1     | 215   | E=1.14969e-93  | 1 |
| RH160J08-3-18915  |          | 6 | 3-5 Rpi-blb2-CC    | 1  | 699   | 801   | E=6.83247e-45  | 1 |
| RH160J08-3-18915  |          | 6 | 3-5 Rpi-blb2-CC    | 2  | 1131  | 1477  | E=1.1985e-149  |   |
| RH160J08-3-18915  |          | 6 | 3-5 Rpi-blb2-NBS   | 2  | 1478  | 1825  | E=3.0661e-165  |   |
| RH160J08-3-18915  |          | 6 | 3-5 Rpi-blb2-LRR   | 3  | 3239  | 3560  | E=5.04858e-141 |   |
| RH160J08-3-18915  |          | 6 | 3-5 Rpi-blb2-CC    | 3  | 4896  | 4944  | E=6.41211e-05  | 1 |
| RH062C02-1-12479  | AC237846 | 6 | 11-17 Rpi-blb2-CC  | -1 | 3833  | 3887  | E=4.21758e-11  | 1 |
| RH062C02-2-110765 |          | 6 | 11-17 Rpi-blb2-NBS | -1 | 26918 | 27017 | E=2.55849e-41  |   |
| RH062C02-2-110765 |          | 6 | 11-17 CaMi-LRR     | -3 | 27191 | 27444 | E=1.10336e-49  |   |
| RH062C02-2-110765 |          | 6 | 11-17 Rpi-blb2-CC  | -2 | 28095 | 28346 | E=1.20414e-104 | 1 |
| RH062C02-2-110765 |          | 6 | 11-17 Rpi-blb2-NBS | -3 | 28459 | 28802 | E=6.11147e-117 |   |
| RH062C02-2-110765 |          | 6 | 11-17 Rpi-blb2-LRR | -3 | 28803 | 28951 | E=3.64378e-57  |   |
| RH062C02-2-110765 |          | 6 | 11-17 Rpi-blb2-LRR | -2 | 28987 | 29094 | E=7.13398e-42  |   |
| RH062C02-2-110765 |          | 6 | 11-17 Sw-5-LRR     | -1 | 29873 | 29939 | E=1.43544e-05  |   |
| RH062C02-3-1274   |          | 6 | 11-17 Mi-1-CC      | -3 | 15    | 421   | E=1.45276e-120 | 1 |
| RH102N16-2-4229   | AC238200 | 6 | 11-17 Mi-1-NBS     | 1  | 14    | 34    | E=0.000359579  | 1 |
| RH102N16-2-4229   |          | 6 | 11-17 Rpi-blb2-NBS | 3  | 32    | 190   | E=9.66325e-62  |   |
| RH102N16-2-4229   |          | 6 | 11-17 CaMi-NBS     | 2  | 174   | 205   | E=1.9875e-05   |   |
| RH102N16-2-4229   |          | 6 | 11-17 Mi-1-LRR     | 2  | 203   | 457   | E=9.04227e-59  |   |
| RH102N16-2-4229   |          | 6 | 11-17 Rpi-blb2-LRR | 3  | 626   | 683   | E=1.01958e-18  |   |
| RH102N16-2-4229   |          | 6 | 11-17 Rpi-blb2-CC  | 2  | 1158  | 1304  | E=9.10263e-34  | 1 |
| RH102N16-3-3740   |          | 6 | 11-17 Rpi-blb2-NBS | 2  | 1     | 135   | E=6.96542e-40  | 1 |
| RH102N16-3-3740   |          | 6 | 11-17 Mi-1-LRR     | 2  | 137   | 497   | E=2.36343e-140 |   |
| RH102N16-5-6527   |          | 6 | 11-17 Rpi-blb2-NBS | -1 | 1     | 194   | E=1.39407e-92  | 1 |
| RH102N16-5-6527   |          | 6 | 11-17 Rpi-blb2-LRR | -1 | 195   | 432   | E=4.62889e-95  |   |
| RH102N16-5-6527   |          | 6 | 11-17 Mi-1-LRR     | -2 | 391   | 508   | E=1.87845e-40  |   |
| RH102N16-5-6527   |          | 6 | 11-17 Rpi-blb2-LRR | -3 | 1606  | 1631  | E=0.00281041   |   |
| RH102N16-5-6527   |          | 6 | 11-17 Sw-5-LRR     | -1 | 1689  | 1755  | E=1.9063e-05   |   |
| RH151C01-4-13416  | AC238283 | 6 | 11-17 Mi-1-CC      | 3  | 225   | 251   | E=0.874511     | 1 |
| RH151C01-4-13416  |          | 6 | 11-17 Rpi-blb2-NBS | 3  | 291   | 390   | E=3.4549e-41   |   |
| RH151C01-4-13416  |          | 6 | 11-17 Gpa2-LRR     | 1  | 681   | 757   | E=1.74119e-06  |   |
| RH151C01-4-13416  |          | 6 | 11-17 Rpi-blb2-CC  | 1  | 1384  | 1635  | E=1.20414e-104 | 1 |
| RH151C01-4-13416  |          | 6 | 11-17 CaMi-CC      | 2  | 1590  | 1737  | E=3.60322e-36  |   |
| RH151C01-4-13416  |          | 6 | 11-17 Rpi-blb2-NBS | 2  | 1728  | 2071  | E=5.57875e-115 |   |
| RH151C01-4-13416  |          | 6 | 11-17 Rpi-blb2-LRR | 2  | 2072  | 2220  | E=2.08398e-56  |   |
| RH151C01-4-13416  |          | 6 | 11-17 Rpi-blb2-LRR | 3  | 2174  | 2264  | E=3.55187e-30  |   |
| RH151C01-4-13416  |          | 6 | 11-17 Rpi-blb2-LRR | 1  | 2276  | 2383  | E=7.62643e-42  |   |
| RH151C01-4-13416  |          | 6 | 11-17 Sw-5-LRR     | 3  | 3246  | 3312  | E=1.4596e-05   |   |
| RH151C01-6-19155  |          | 6 | 11-17 CaMi-LRR     | 1  | 300   | 344   | E=7.73684e-08  | 1 |
| RH151C01-6-19155  |          | 6 | 11-17 Mi-1-LRR     | 2  | 329   | 372   | E=1.29202e-07  |   |
| RH151C01-6-19155  |          | 6 | 11-17 Rpi-blb2-CC  | -2 | 373   | 937   | E=6.75241e-172 |   |
| RH151C01-6-19155  |          | 6 | 11-17 Rpi-blb2-NBS | -2 | 938   | 1293  | E=1.4227e-137  |   |
| RH151C01-6-19155  |          | 6 | 11-17 Mi-1-LRR     | -2 | 1295  | 1655  | E=4.41508e-143 |   |
| RH074N01-4-15827  | AC238108 | 6 | 16-17 Rpi-blb2-CC  | -2 | 1     | 250   | E=1.28801e-102 | 1 |
| RH074N01-4-15827  |          | 6 | 16-17 Rpi-blb2-NBS | -2 | 251   | 572   | E=2.04085e-130 |   |
| RH074N01-4-15827  |          | 6 | 16-17 R1-LRR       | -2 | 470   | 565   | E=6.00542e-10  |   |
| RH074N01-4-15827  |          | 6 | 16-17 Mi-1-LRR     | -3 | 556   | 724   | E=1.0009e-53   |   |
| RH074N01-4-15827  |          | 6 | 16-17 Mi-1-LRR     | -2 | 1471  | 1713  | E=7.77002e-64  |   |
| RH126I21-16-8999  | AC238227 | 6 | 23-24 CaMi-CC      | 2  | 231   | 781   | E=0.0          | 1 |
| RH126I21-16-8999  |          | 6 | 23-24 Rpi-blb2-NBS | 2  | 772   | 1126  | E=2.93419e-144 |   |
| RH126I21-16-8999  |          | 6 | 23-24 Mi-1-LRR     | 2  | 1127  | 1489  | E=7.50919e-153 |   |
| RH126I21-2-14009  |          | 6 | 23-24 CaMi-CC      | -3 | 233   | 283   | E=3.25352e-14  | 1 |
| RH126I21-2-14009  |          | 6 | 23-24 Rpi-blb2-NBS | -3 | 274   | 323   | E=9.08189e-17  |   |
| RH126I21-2-14009  |          | 6 | 23-24 Rpi-blb2-NBS | -1 | 323   | 574   | E=2.2605e-94   |   |
| RH126I21-2-14009  |          | 6 | 23-24 Rpi-blb2-LRR | -1 | 600   | 782   | E=3.21232e-60  |   |
| RH126I21-4-14661  |          | 6 | 23-24 CaMi-CC      | -3 | 418   | 520   | E=8.49513e-42  | 1 |
| RH126I21-4-14661  |          | 6 | 23-24 Rpi-blb2-CC  | -2 | 519   | 633   | E=2.74851e-49  |   |
| RH126I21-4-14661  |          | 6 | 23-24 Rpi-blb2-CC  | -1 | 622   | 736   | E=4.00325e-47  |   |
| RH126I21-4-14661  |          | 6 | 23-24 Rpi-blb2-NBS | -3 | 789   | 1063  | E=4.08037e-129 |   |
| RH126I21-4-14661  |          | 6 | 23-24 Mi-1-LRR     | -3 | 2539  | 2752  | E=1.74841e-86  |   |
| RH126I21-4-14661  |          | 6 | 23-24 Rpi-blb2-LRR | -1 | 3088  | 3175  | E=3.00006e-08  |   |
| RH125E08-3-30619  | AC240012 | 6 | Rpi-blb2-CC        | -3 | 1910  | 2369  | E=9.2439e-96   | 1 |
| RH125E08-3-30619  |          | 6 | Rpi-blb2-NBS       | -1 | 2389  | 2745  | E=9.2726e-118  |   |
| RH125E08-3-30619  |          | 6 | CaMi-LRR           | -1 | 2750  | 3066  | E=3.47247e-66  |   |
| RH010L20-1-44116  | AC237930 | 6 | Rpi-blb2-CC        | 1  | 1287  | 1633  | E=1.07156e-161 | 1 |
| RH010L20-1-44116  |          | 6 | Rpi-blb2-NBS       | 1  | 1634  | 1988  | E=5.79081e-159 |   |
| RH010L20-1-44116  |          | 6 | Rpi-blb2-LRR       | 1  | 1989  | 2350  | E=3.19778e-162 |   |
| RH010L20-1-44116  |          | 6 | Prf-CC             | 3  | 4287  | 4474  | E=7.7275e-08   | 1 |
| RH010L20-1-44116  |          | 6 | Mla1-NBS           | 3  | 4448  | 4784  | E=6.79363e-30  |   |
| RH010L20-1-44116  |          | 6 | CaMi-CC            | 2  | 6129  | 6663  | E=0.0          | 1 |

|                  |          |   |                    |    |       |       |                |                     |
|------------------|----------|---|--------------------|----|-------|-------|----------------|---------------------|
| RH010L20-1-44116 |          | 6 | Rpi-blb2-NBS       | 2  | 6654  | 7007  | E=2.26926e-167 |                     |
| RH010L20-1-44116 |          | 6 | Rpi-blb2-LRR       | 2  | 7008  | 7368  | E=3.91469e-155 |                     |
| RH010L20-1-44116 |          | 6 | CaMi-CC            | 3  | 10841 | 11397 | E=0.0          | 1                   |
| RH010L20-1-44116 |          | 6 | Rpi-blb2-NBS       | 3  | 11388 | 11738 | E=5.33807e-152 |                     |
| RH010L20-1-44116 |          | 6 | Mi-1-LRR           | 3  | 11739 | 11999 | E=1.72336e-107 |                     |
| RH010L20-1-44116 |          | 6 | I2-LRR             | 1  | 12760 | 12852 | E=0.00311261   |                     |
| RH010L20-3-17195 |          | 6 | Rpi-blb2-CC        | -3 | 3880  | 4271  | E=2.40301e-167 | 1                   |
| RH010L20-3-17195 |          | 6 | Rpi-blb2-NBS       | -3 | 4272  | 4624  | E=1.77599e-149 |                     |
| RH010L20-3-17195 |          | 6 | Mi-1-LRR           | -3 | 4625  | 4890  | E=3.01062e-111 |                     |
| RH010L20-3-17195 |          | 6 | Rpi-blb2-LRR       | -2 | 4817  | 4913  | E=8.73082e-36  |                     |
| RH010L20-5-41313 |          | 6 | Rpi-blb2-CC        | 1  | 12667 | 12955 | E=2.18115e-127 | 1                   |
| Vib-TNL          |          |   |                    |    |       |       |                |                     |
| RH001C14-1-10789 | AC239955 | 6 | 16 N-Nt-NBS        | 2  | 1897  | 2122  | E=3.22786e-74  | BACend tool         |
| RH001C14-3-7384  |          | 6 | 16 Y-1-LRR         | -3 | 1235  | 1288  | E=6.7903e-10   | 1                   |
| RH001C14-3-7384  |          | 6 | 16 N-Nt-CNL        | -3 | 1239  | 1412  | E=2.14114e-30  |                     |
| RH001C14-4-3319  |          | 6 | 16 Bs4-NBS         | 2  | 103   | 161   | E=4.15732e-09  | 1                   |
| RH001C14-4-3319  |          | 6 | 16 N-Nt-LRR        | 2  | 125   | 230   | E=1.39228e-13  |                     |
| RH001C14-4-3319  |          | 6 | 16 P2-NBS          | 2  | 164   | 226   | E=3.02975e-06  | 1                   |
| RH001C14-6-6494  |          | 6 | 16 Bs4-LRR         | 1  | 220   | 437   | E=2.1639e-55   | 1                   |
| RH001C14-7-18773 |          | 6 | 16 Y-1-LRR         | -3 | 2529  | 2927  | E=1.30522e-115 | 1                   |
| RH001C14-7-18773 |          | 6 | 16 N-Nt-CNL        | -3 | 2880  | 3006  | E=3.23361e-47  |                     |
| RH001C14-7-18773 |          | 6 | 16 N-Nt-LRR        | -2 | 3449  | 3596  | E=9.57502e-39  | 1                   |
| RH001C14-8-12619 |          | 6 | 16 Bs4-TIR         | 3  | 1733  | 1816  | E=4.72095e-38  | 1                   |
| RH001C14-8-12619 |          | 6 | 16 Bs4-TIR         | 2  | 3319  | 3396  | E=8.37442e-18  |                     |
| RH001C14-8-12619 |          | 6 | 16 N-Nt-NBS        | 2  | 3460  | 3713  | E=1.85135e-92  |                     |
| RH001C14-9-3112  |          | 6 | 16 Bs4-TIR         | -2 | 333   | 490   | E=4.67058e-75  | 1                   |
| RH001C14-9-3112  |          | 6 | 16 Bs4-NBS         | -1 | 583   | 953   | E=1.05479e-135 |                     |
| RH020A06-1-23965 | AC237953 | 6 | 16 Y-1-LRR         | 2  | 1840  | 1979  | E=6.58225e-31  | potato physical map |
| RH020A06-1-23965 |          | 6 | 16 Bs4-LRR         | 3  | 1976  | 2014  | E=4.35056e-06  |                     |
| RH020A06-1-23965 |          | 6 | 16 N-Nt-CNL        | 3  | 2000  | 2119  | E=4.49935e-30  |                     |
| RH020A06-1-23965 |          | 6 | 16 Bs4-NBS         | -1 | 6769  | 6829  | E=1.1985e-11   | 1                   |
| RH020A06-1-23965 |          | 6 | 16 Bs4-LRR         | -3 | 6895  | 6940  | E=1.85429e-12  |                     |
| RH020A06-1-23965 |          | 6 | 16 N-Nt-LRR        | -2 | 7005  | 7114  | E=5.07008e-16  |                     |
| RH020A06-1-23965 |          | 6 | 16 Y-1-LRR         | -1 | 7040  | 7265  | E=9.52621e-51  |                     |
| RH020A06-1-23965 |          | 6 | 16 N-Nt-CNL        | -2 | 7264  | 7355  | E=1.75614e-23  |                     |
| RH020A06-10-7375 |          | 6 | 16 Bs4-TIR         | -3 | 673   | 830   | E=1.16908e-75  | 1                   |
| RH020A06-10-7375 |          | 6 | 16 Bs4-NBS         | -2 | 923   | 1293  | E=6.5538e-137  |                     |
| RH020A06-10-7375 |          | 6 | 16 Bs4-NBS         | -1 | 1384  | 1442  | E=4.29842e-09  |                     |
| RH020A06-10-7375 |          | 6 | 16 N-Nt-LRR        | -1 | 1406  | 1511  | E=1.13962e-13  |                     |
| RH020A06-11-4912 |          | 6 | 16 Y-1-LRR         | -1 | 1123  | 1176  | E=6.62244e-10  | 1                   |
| RH020A06-11-4912 |          | 6 | 16 N-Nt-CNL        | -1 | 1127  | 1300  | E=2.25106e-30  |                     |
| RH020A06-2-13127 |          | 6 | 16 Bs4-TIR         | -1 | 1727  | 1810  | E=4.60424e-38  | 1                   |
| RH020A06-2-13127 |          | 6 | 16 Bs4-TIR         | -3 | 3312  | 3389  | E=8.37442e-18  |                     |
| RH020A06-2-13127 |          | 6 | 16 N-Nt-NBS        | -3 | 3453  | 3706  | E=2.13349e-92  |                     |
| RH020A06-3-25187 |          | 6 | 16 N-Nt-NBS        | -1 | 6729  | 6954  | E=2.14403e-75  | 1                   |
| RH020A06-4-21605 |          | 6 | 16 Y-1-LRR         | 1  | 4254  | 4357  | E=1.54433e-24  | 1                   |
| RH020A06-4-21605 |          | 6 | 16 Y-1-LRR         | 2  | 4441  | 4542  | E=1.47404e-12  |                     |
| RH020A06-4-21605 |          | 6 | 16 N-Nt-CNL        | 2  | 4500  | 4620  | E=5.39809e-35  |                     |
| RH020A06-5-11184 |          | 6 | 16 Y-1-LRR         | -3 | 94    | 492   | E=1.26237e-115 | 1                   |
| RH020A06-5-11184 |          | 6 | 16 N-Nt-CNL        | -3 | 445   | 571   | E=1.72947e-47  |                     |
| RH020A06-5-11184 |          | 6 | 16 N-Nt-LRR        | -2 | 1007  | 1154  | E=7.33133e-39  | 1                   |
| RH020A06-9-8043  |          | 6 | 16 Bs4-LRR         | -3 | 776   | 993   | E=5.28405e-55  | 1                   |
| RH031N12-1-12738 | AC237983 | 6 | 16-19 Y-1-LRR      | -1 | 253   | 702   | E=8.10793e-89  | RGH-SSR8            |
| RH031N12-1-12738 |          | 6 | 16-19 N-Nt-CNL     | -1 | 644   | 780   | E=3.2607e-47   | 1                   |
| RH031N12-8-50141 |          | 6 | 16-19 Bs4-TIR      | 1  | 7250  | 7408  | E=3.18557e-71  | 1                   |
| RH031N12-8-50141 |          | 6 | 16-19 Bs4-NBS      | 3  | 7389  | 7495  | E=2.03842e-21  |                     |
| RH031N12-8-50141 |          | 6 | 16-19 Bs4-NBS      | 1  | 7587  | 7856  | E=2.19824e-106 |                     |
| RH061D10-1-45637 | AC237843 | 6 | 16 Bs4-TIR         | 2  | 8839  | 8996  | E=1.03155e-75  | BACend tool         |
| RH061D10-1-45637 |          | 6 | 16 Bs4-NBS         | 1  | 9086  | 9456  | E=7.67521e-139 | 1                   |
| RH061D10-1-45637 |          | 6 | 16 Bs4-NBS         | 3  | 9571  | 9629  | E=2.417e-09    |                     |
| RH061D10-1-45637 |          | 6 | 16 N-Nt-LRR        | 3  | 9593  | 9698  | E=1.16851e-13  |                     |
| RH061D10-1-45637 |          | 6 | 16 Y-1-LRR         | 1  | 13632 | 14030 | E=7.58831e-116 |                     |
| RH061D10-1-45637 |          | 6 | 16 N-Nt-CNL        | 1  | 13983 | 14109 | E=3.23361e-47  |                     |
| RH074N01-11-2483 | AC238108 | 6 | 16-17 N-Nt-NBS     | 2  | 40    | 278   | E=4.20473e-83  | potato physical map |
| RH074N01-11-2483 |          | 6 | 16-17 N-Nt-NBS     | 1  | 243   | 342   | E=5.17165e-31  |                     |
| RH074N01-11-2483 |          | 6 | 16-17 Bs4-LRR      | 2  | 539   | 585   | E=8.90068e-12  |                     |
| RH106C12-1-15423 | AC238211 | 6 | 16-19 Bs4-TIR      | -1 | 4488  | 4650  | E=6.08936e-81  | RGH-SSR30           |
| RH106C12-1-15423 |          | 6 | 16-19 N-Nt-NBS     | -1 | 4737  | 4775  | E=4.82681e-10  |                     |
| RH106C12-4-3699  |          | 6 | 16-19 Rpi-blb2-CC  | -3 | 1     | 262   | E=1.08973e-103 | 1                   |
| RH106C12-4-3699  |          | 6 | 16-19 Rpi-blb2-NBS | -3 | 263   | 392   | E=1.76566e-54  |                     |
| RH106C12-4-3699  |          | 6 | 16-19 Mi-1-NBS     | -1 | 374   | 427   | E=4.67316e-21  |                     |
| RH106C12-4-3699  |          | 6 | 16-19 Rpi-blb2-NBS | -2 | 413   | 580   | E=3.84181e-49  |                     |
| RH106C12-4-3699  |          | 6 | 16-19 Mi-1-LRR     | -2 | 581   | 933   | E=8.62265e-79  |                     |
| RH106C12-4-3699  |          | 6 | 16-19 CaMi-LRR     | -1 | 665   | 813   | E=1.61172e-37  |                     |
| RH123D21-4-33616 | AC238221 | 6 | 16-18 Bs4-LRR      | 1  | 4034  | 4137  | E=4.64279e-12  | potato physical map |
| RH123D21-4-33616 |          | 6 | 16-18 N-Nt-NBS     | -3 | 7435  | 7479  | E=1.26039e-08  | 1                   |
| RH123D21-4-33616 |          | 6 | 16-18 Y-1-NBS      | -3 | 7435  | 7481  | E=1.70229e-07  |                     |
| RH123D21-4-33616 |          | 6 | 16-18 Bs4-NBS      | -2 | 7490  | 7869  | E=2.43114e-104 |                     |
| RH123D21-4-33616 |          | 6 | 16-18 Y-1-LRR      | -2 | 7889  | 8308  | E=9.11522e-88  |                     |
| RH123D21-4-33616 |          | 6 | 16-18 N-Nt-CNL     | -2 | 8264  | 8386  | E=9.19175e-41  |                     |
| RH044F20-1-8317  | AC238020 | 6 | 23-24 Bs4-TIR      | -1 | 675   | 825   | E=3.34716e-73  | BACend tool         |
| RH044F20-1-8317  |          | 6 | 23-24 Rpp5-TIR     | -3 | 941   | 994   | E=4.13776e-05  |                     |
| RH044F20-1-8317  |          | 6 | 23-24 N-Nt-NBS     | -3 | 945   | 1219  | E=2.5356e-72   |                     |
| RH044F20-1-8317  |          | 6 | 23-24 Y-1-NBS      | -2 | 1135  | 1187  | E=9.09665e-11  |                     |
| RH044F20-1-8317  |          | 6 | 23-24 Y-1-NBS      | -1 | 1214  | 1308  | E=2.4708e-17   |                     |
| RH044F20-1-8317  |          | 6 | 23-24 Bs4-LRR      | -2 | 1435  | 1486  | E=4.33922e-15  |                     |
| RH044F20-1-8317  |          | 6 | 23-24 N-Nt-LRR     | -1 | 2312  | 2531  | E=3.48478e-43  |                     |
| RH095H07-3-17331 | AC238176 | 6 | 23-24 Y-1-CNL      | -2 | 875   | 907   | E=2.40367e-07  | RGH-SSR26           |
| RH095H07-3-17331 |          | 6 | 23-24 Y-1-TIR      | -3 | 1443  | 1469  | E=0.0519986    | 1                   |
| RH095H07-3-17331 |          | 6 | 23-24 Bs4-TIR      | -2 | 2645  | 2785  | E=1.17486e-58  |                     |
| RH095H07-3-17331 |          | 6 | 23-24 N-Nt-NBS     | -1 | 2833  | 2887  | E=1.14031e-08  |                     |
| RH095H07-3-17331 |          | 6 | 23-24 N-Nt-NBS     | -2 | 2907  | 2956  | E=2.16729e-09  |                     |
| RH095H07-4-13282 |          | 6 | 23-24 Bs4-LRR      | -2 | 2149  | 2249  | E=6.01852e-09  | 1                   |
| RH095H07-4-13282 |          | 6 | 23-24 N-Nt-NBS     | 1  | 2959  | 3015  | E=8.71838e-14  |                     |
| RH095H07-4-13282 |          | 6 | 23-24 N-Nt-NBS     | 2  | 3018  | 3296  | E=4.71342e-92  |                     |
| RH095H07-4-13282 |          | 6 | 23-24 N-Nt-NBS     | 3  | 3386  | 3670  | E=1.75891e-96  |                     |
| RH095H07-4-13282 |          | 6 | 23-24 Bs4-LRR      | 1  | 3778  | 3821  | E=4.4943e-09   |                     |
| RH095H07-4-13282 |          | 6 | 23-24 N-Nt-LRR     | 3  | 3846  | 3885  | E=2.24469e-06  |                     |
| RH095H07-4-13282 |          | 6 | 23-24 Y-1-LRR      | 2  | 3884  | 4150  | E=1.12464e-53  |                     |

|                   |          |   |       |            |    |      |      |                |                     |   |
|-------------------|----------|---|-------|------------|----|------|------|----------------|---------------------|---|
| RH095H07-5-21246  |          | 6 | 23-24 | N-Nt-CNL   | -3 | 5719 | 5823 | E=7.49586e-25  |                     | 1 |
| RH095H07-6-32606  |          | 6 | 23-24 | N-Nt-NBS   | 3  | 187  | 429  | E=3.70364e-89  |                     | 1 |
| RH095H07-6-32606  |          | 6 | 23-24 | Bs4-LRR    | 1  | 507  | 551  | E=2.22985e-09  |                     |   |
| RH095H07-6-32606  |          | 6 | 23-24 | Y-1-LRR    | 3  | 604  | 967  | E=1.78814e-94  |                     |   |
| RH095H07-6-32606  |          | 6 | 23-24 | N-Nt-CNL   | 3  | 922  | 1046 | E=3.21232e-41  |                     |   |
| RH095H07-6-32606  |          | 6 | 23-24 | N-Nt-LRR   | -3 | 5601 | 5675 | E=3.1803e-13   |                     | 1 |
| RH095H07-7-9877   |          | 6 | 23-24 | N-Nt-NBS   | -1 | 414  | 753  | E=8.14206e-106 |                     | 1 |
| RH095H07-7-9877   |          | 6 | 23-24 | Bs4-LRR    | -1 | 855  | 899  | E=9.28255e-11  |                     |   |
| RH095H07-7-9877   |          | 6 | 23-24 | N-Nt-LRR   | -3 | 863  | 947  | E=1.43047e-06  |                     |   |
| RH095H07-7-9877   |          | 6 | 23-24 | Y-1-LRR    | -2 | 929  | 1260 | E=2.08757e-78  |                     |   |
| RH095H07-7-9877   |          | 6 | 23-24 | N-Nt-CNL   | -2 | 1202 | 1338 | E=4.12479e-42  |                     |   |
| RH095H07-8-31530  |          | 6 | 23-24 | Bs4-NBS    | 2  | 2113 | 2229 | E=8.2999e-13   |                     | 1 |
| RH095H07-8-31530  |          | 6 | 23-24 | Bs4-LRR    | 1  | 2232 | 2273 | E=6.27128e-11  |                     |   |
| RH095H07-8-31530  |          | 6 | 23-24 | Y-1-LRR    | 3  | 2301 | 2557 | E=4.98608e-68  |                     |   |
| RH095H07-8-31530  |          | 6 | 23-24 | Y-1-LRR    | 2  | 2607 | 2653 | E=2.23649e-13  |                     |   |
| RH095H07-8-31530  |          | 6 | 23-24 | N-Nt-CNL   | 2  | 2608 | 2732 | E=3.32134e-41  |                     |   |
| RH095H07-8-31530  |          | 6 | 23-24 | Y-1-LRR    | -2 | 8937 | 9076 | E=3.00175e-34  |                     | 1 |
| RH095H07-8-31530  |          | 6 | 23-24 | Bs4-LRR    | -3 | 9090 | 9129 | E=9.85227e-07  |                     |   |
| RH095H07-8-31530  |          | 6 | 23-24 | N-Nt-CNL   | -3 | 9109 | 9233 | E=1.05381e-29  |                     |   |
| RH095H07-9-37540  |          | 6 | 23-24 | N-Nt-LRR   | -2 | 4719 | 4790 | E=5.52086e-10  |                     | 1 |
| RH095H07-9-37540  |          | 6 | 23-24 | N-Nt-NBS   | 2  | 8068 | 8231 | E=1.13627e-49  |                     | 1 |
| RH095H07-9-37540  |          | 6 | 23-24 | Bs4-NBS    | 1  | 8977 | 9147 | E=4.42116e-27  |                     |   |
| RH095H07-9-37540  |          | 6 | 23-24 | N-Nt-LRR   | 3  | 9131 | 9170 | E=2.50114e-07  |                     |   |
| RH095H07-9-37540  |          | 6 | 23-24 | Y-1-LRR    | 2  | 9149 | 9363 | E=9.16349e-41  |                     |   |
| RH095H07-9-37540  |          | 6 | 23-24 | Bs4-LRR    | 1  | 9163 | 9207 | E=1.96582e-12  |                     |   |
| RH095H07-9-37540  |          | 6 | 23-24 | Y-1-LRR    | 3  | 9365 | 9457 | E=2.93264e-28  |                     |   |
| RH095H07-9-37540  |          | 6 | 23-24 | N-Nt-CNL   | 3  | 9412 | 9536 | E=2.74059e-42  |                     |   |
| RH169F21-10-21085 | AC238336 | 6 | 23-24 | Bs4-NBS    | -3 | 3757 | 4089 | E=7.29078e-86  | potato physical map | 1 |
| RH169F21-10-21085 |          | 6 | 23-24 | N-Nt-LRR   | 2  | 3884 | 3929 | E=4.75785e-05  |                     |   |
| RH169F21-10-21085 |          | 6 | 23-24 | N-Nt-LRR   | -2 | 4174 | 4247 | E=9.87767e-18  |                     |   |
| RH169F21-10-21085 |          | 6 | 23-24 | Y-1-LRR    | -3 | 4355 | 4555 | E=2.77975e-40  |                     |   |
| RH169F21-10-21085 |          | 6 | 23-24 | N-Nt-CNL   | -3 | 4510 | 4633 | E=6.64052e-40  |                     |   |
| RH169F21-18-3387  |          | 6 | 23-24 | Bs4-NBS    | -3 | 1    | 53   | E=1.24992e-10  |                     | 1 |
| RH169F21-18-3387  |          | 6 | 23-24 | Bs4-NBS    | -1 | 51   | 243  | E=2.42176e-31  |                     |   |
| RH169F21-18-3387  |          | 6 | 23-24 | Bs4-LRR    | -1 | 259  | 305  | E=2.91059e-11  |                     |   |
| RH169F21-18-3387  |          | 6 | 23-24 | Y-1-LRR    | -2 | 310  | 654  | E=1.57377e-74  |                     |   |
| RH169F21-18-3387  |          | 6 | 23-24 | N-Nt-CNL   | -2 | 609  | 699  | E=2.53439e-24  |                     |   |
| RH169F21-18-3387  |          | 6 | 23-24 | N-Nt-CNL   | -1 | 670  | 730  | E=2.44355e-06  |                     |   |
| RH169F21-4-5086   |          | 6 | 23-24 | Bs4-LRR    | 1  | 887  | 990  | E=5.00486e-12  |                     | 1 |
| RH169F21-5-21775  |          | 6 | 23-24 | Y-1-LRR    | -2 | 1993 | 2372 | E=5.47895e-117 |                     | 1 |
| RH169F21-5-21775  |          | 6 | 23-24 | N-Nt-CNL   | -2 | 2325 | 2451 | E=1.33569e-46  |                     |   |
| RH169F21-5-21775  |          | 6 | 23-24 | Y-1-LRR    | -1 | 2903 | 3162 | E=4.00904e-72  |                     | 1 |
| RH169F21-5-21775  |          | 6 | 23-24 | N-Nt-LRR   | -3 | 3212 | 3283 | E=3.46105e-09  |                     |   |
| RH169F21-7-6199   |          | 6 | 23-24 | Bs4-TIR    | 3  | 577  | 734  | E=9.03421e-73  |                     | 1 |
| RH169F21-7-6199   |          | 6 | 23-24 | Bs4-NBS    | 3  | 828  | 978  | E=7.58474e-36  |                     |   |
| RH169F21-7-6199   |          | 6 | 23-24 | Bs4-NBS    | 1  | 1115 | 1340 | E=7.04943e-87  |                     |   |
| RH169F21-7-6199   |          | 6 | 23-24 | N-Nt-LRR   | 3  | 1501 | 1606 | E=1.03938e-14  |                     |   |
| RH169F21-8-21528  |          | 6 | 23-24 | N-Nt-CNL   | 1  | 1073 | 1217 | E=2.14487e-24  |                     | 1 |
| RH169F21-8-21528  |          | 6 | 23-24 | Bs4-TIR    | 2  | 3497 | 3580 | E=5.00344e-39  |                     | 1 |
| RH169F21-8-21528  |          | 6 | 23-24 | Bs4-TIR    | 3  | 5042 | 5119 | E=2.20316e-19  |                     |   |
| RH169F21-8-21528  |          | 6 | 23-24 | Bs4-NBS    | 3  | 5185 | 5620 | E=5.64312e-135 |                     |   |
| RH169F21-8-21528  |          | 6 | 23-24 | Y-1-LRR    | 3  | 5640 | 6066 | E=1.90284e-81  |                     |   |
| RH169F21-8-21528  |          | 6 | 23-24 | N-Nt-CNL   | 3  | 6039 | 6156 | E=4.94473e-21  |                     |   |
| RH169F21-9-370    |          | 6 | 23-24 | N-Nt-NBS   | -1 | 66   | 119  | E=3.26004e-11  |                     | 1 |
| RH061F13-7-23787  | AC238074 | 6 | 27-29 | Bs4-TIR    | 3  | 1375 | 1440 | E=3.07693e-18  | SSR-RGH17           | 1 |
| RH061F13-7-23787  |          | 6 | 27-29 | Y-1-NBS    | 3  | 1543 | 1775 | E=1.96272e-34  |                     |   |
| RH061F13-7-23787  |          | 6 | 27-29 | Bs4-NBS    | 1  | 1746 | 1847 | E=4.9661e-29   |                     |   |
| RH061F13-7-23787  |          | 6 | 27-29 | N-Nt-LRR   | 3  | 2394 | 2466 | E=4.25642e-15  |                     |   |
| RH001F12-3-30310  | AC237902 | 6 |       | Y-1-LRR    | 3  | 3557 | 4006 | E=6.05632e-88  | RGH-SSR1 (SH06B005) | 1 |
| RH001F12-3-30310  |          | 6 |       | N-Nt-CNL   | 3  | 3948 | 4084 | E=8.58328e-47  |                     |   |
| RH001F12-4-25627  |          | 6 |       | Bs4-LRR    | 1  | 2122 | 2222 | E=4.0661e-09   |                     | 1 |
| RH001F12-4-25627  |          | 6 |       | Rpp5-TIR   | -2 | 6820 | 6883 | E=0.000729961  |                     | 1 |
| RH001F12-4-25627  |          | 6 |       | N-Nt-NBS   | -2 | 6834 | 6890 | E=7.44023e-14  |                     |   |
| RH001F12-4-25627  |          | 6 |       | N-Nt-NBS   | -3 | 6899 | 7177 | E=2.13349e-92  |                     |   |
| RH001F12-4-25627  |          | 6 |       | N-Nt-NBS   | -1 | 7268 | 7552 | E=7.57277e-97  |                     |   |
| RH001F12-4-25627  |          | 6 |       | Bs4-LRR    | -2 | 7653 | 7696 | E=7.29178e-09  |                     |   |
| RH001F12-4-25627  |          | 6 |       | N-Nt-LRR   | -1 | 7728 | 7767 | E=2.83543e-06  |                     |   |
| RH001F12-4-25627  |          | 6 |       | N-Nt-LRR   | -3 | 7784 | 8000 | E=1.42624e-45  |                     |   |
| RH001F12-6-13485  |          | 6 |       | Rpp5-TIR   | -1 | 435  | 495  | E=0.00289202   |                     | 1 |
| RH001F12-6-13485  |          | 6 |       | N-Nt-NBS   | -1 | 449  | 788  | E=2.9667e-106  |                     |   |
| RH001F12-6-13485  |          | 6 |       | Bs4-LRR    | -1 | 890  | 934  | E=9.92331e-11  |                     |   |
| RH001F12-6-13485  |          | 6 |       | Y-1-LRR    | -2 | 963  | 1294 | E=1.38702e-78  |                     |   |
| RH001F12-6-13485  |          | 6 |       | N-Nt-CNL   | -2 | 1236 | 1372 | E=4.33655e-42  |                     |   |
| RH001F12-7-3365   |          | 6 |       | N-Nt-CNL   | 2  | 128  | 232  | E=8.01328e-25  |                     | 1 |
| Vic-TNL           |          |   |       |            |    |      |      |                |                     |   |
| RH158K09-1-3950   | AC238299 | 6 | 34-57 | N-Nt-CNL   | 3  | 7    | 149  | E=1.58341e-06  | potato physical map | 1 |
| RH158K09-13-2275  |          | 6 | 34-57 | Gro1-4-NBS | 1  | 1    | 238  | E=1.13568e-41  |                     | 1 |
| RH158K09-18-2775  |          | 6 | 34-57 | Gro1-4-TIR | 3  | 438  | 587  | E=1.05116e-25  |                     | 1 |
| RH158K09-2-1327   |          | 6 | 34-57 | Gro1-4-TIR | 3  | 38   | 184  | E=2.38929e-42  |                     | 1 |
| RH158K09-21-3991  |          | 6 | 34-57 | Bs4-NBS    | 2  | 891  | 1241 | E=1.62009e-65  |                     | 1 |
| RH158K09-22-2983  |          | 6 | 34-57 | Y-1-LRR    | 1  | 1    | 320  | E=8.05792e-24  |                     | 1 |
| RH158K09-22-2983  |          | 6 | 34-57 | N-Nt-CNL   | 1  | 283  | 420  | E=1.3073e-05   |                     |   |
| RH158K09-23-2985  |          | 6 | 34-57 | Gro1-4-TIR | 1  | 505  | 622  | E=5.79604e-36  |                     | 1 |
| RH158K09-3-1429   |          | 6 | 34-57 | Gro1-4-TIR | 2  | 374  | 443  | E=2.03678e-17  |                     | 1 |
| RH158K09-9-1229   |          | 6 | 34-57 | Bs4-NBS    | 1  | 1    | 255  | E=2.88368e-62  |                     | 1 |
| RH159P03-13-3450  | AC238304 | 6 | 34-57 | Bs4-NBS    | -2 | 812  | 1108 | E=1.33565e-69  | potato physical map | 1 |
| RH159P03-18-2003  |          | 6 | 34-57 | Bs4-TIR    | 3  | 194  | 331  | E=4.6617e-24   |                     | 1 |
| RH159P03-4-1356   |          | 6 | 34-57 | Bs4-NBS    | -1 | 1    | 220  | E=2.23228e-53  |                     | 1 |
| RH172C14-1-28079  | AC238344 | 6 | 34-57 | Gro1-4-TIR | 1  | 3065 | 3169 | E=7.64215e-32  | potato physical map | 1 |
| RH172C14-1-28079  |          | 6 | 34-57 | Bs4-NBS    | 2  | 3879 | 4214 | E=8.37323e-69  |                     |   |
| RH172C14-1-28079  |          | 6 | 34-57 | Y-1-LRR    | 1  | 7478 | 7895 | E=1.35517e-43  |                     |   |
| RH172C14-2-30612  |          | 6 | 34-57 | N-Nt-NBS   | 3  | 480  | 823  | E=2.43976e-61  |                     | 1 |
| RH172C14-2-30612  |          | 6 | 34-57 | Gro1-4-TIR | 3  | 2983 | 3095 | E=1.09277e-35  |                     | 1 |
| RH172C14-2-30612  |          | 6 | 34-57 | Bs4-NBS    | 2  | 5233 | 5562 | E=5.40695e-81  |                     |   |
| RH172C14-2-30612  |          | 6 | 34-57 | Gro1-4-NBS | 1  | 6045 | 6143 | E=3.0453e-06   |                     |   |
| RH172C14-2-30612  |          | 6 | 34-57 | Gro1-4-LRR | 2  | 6097 | 6500 | E=8.04657e-53  |                     |   |
| RH172C14-2-30612  |          | 6 | 34-57 | N-Nt-CNL   | 2  | 6463 | 6605 | E=5.53687e-05  |                     |   |
| RH172C14-4-42849  |          | 6 | 34-57 | Gro1-4-TIR | 1  | 3895 | 4034 | E=2.83798e-24  |                     | 1 |
| RH172C14-4-42849  |          | 6 | 34-57 | Gro1-4-TIR | -1 | 7985 | 8081 | E=5.57051e-29  |                     |   |



|           |                   |          |   |       |            |    |       |       |                |                                  |   |
|-----------|-------------------|----------|---|-------|------------|----|-------|-------|----------------|----------------------------------|---|
|           | RH172C14-4-42849  |          | 6 | 34-57 | Bs4-NBS    | -2 | 8318  | 8639  | E=2.27893e-68  |                                  |   |
|           | RH172C14-4-42849  |          | 6 | 34-57 | N-Nt-NBS   | 2  | 9215  | 9563  | E=5.21012e-63  |                                  |   |
|           | RH172C14-4-42849  |          | 6 | 34-57 | Gro1-4-TIR | 3  | 9734  | 9850  | E=7.95848e-36  |                                  | 1 |
|           | RH172C14-4-42849  |          | 6 | 34-57 | Bs4-NBS    | 1  | 10505 | 10834 | E=1.21605e-76  |                                  |   |
|           | RH172C14-4-42849  |          | 6 | 34-57 | Bs4-LRR    | 3  | 12316 | 12369 | E=1.01866e-06  |                                  |   |
|           | RH172C14-4-42849  |          | 6 | 34-57 | Gro1-4-LRR | 2  | 12414 | 12817 | E=2.40541e-45  |                                  |   |
|           | RH172C14-4-42849  |          | 6 | 34-57 | N-Nt-CNL   | 2  | 12778 | 12915 | E=3.06098e-06  |                                  |   |
|           | RH172C14-4-42849  |          | 6 | 34-57 | Bs4-NBS    | 3  | 13265 | 13378 | E=2.89476e-20  |                                  | 1 |
|           | RH172C14-5-3810   |          | 6 | 34-57 | Gro1-4-TIR | 3  | 538   | 665   | E=1.01754e-22  |                                  | 1 |
|           | RH186H09-3-2733   | AC238372 | 6 | 34-57 | Bs4-NBS    | 3  | 481   | 806   | E=6.21511e-61  | BACend tool/ potato physical map | 1 |
|           | RH186H09-4-13312  |          | 6 | 34-57 | N-Nt-LRR   | 3  | 2227  | 2502  | E=2.56379e-08  |                                  | 1 |
|           | RH186H09-4-13312  |          | 6 | 34-57 | Bs4-LRR    | 3  | 2556  | 2681  | E=1.09842e-05  |                                  |   |
|           | RH186H09-5-39315  |          | 6 | 34-57 | Bs4-NBS    | 3  | 3414  | 3739  | E=3.61127e-63  |                                  | 1 |
|           | RH186H09-5-39315  |          | 6 | 34-57 | Gro1-4-TIR | 3  | 4373  | 4492  | E=1.43916e-35  |                                  | 1 |
|           | RH186H09-5-39315  |          | 6 | 34-57 | Gro1-4-TIR | 1  | 4557  | 4583  | E=0.0451938    |                                  |   |
|           | RH186H09-5-39315  |          | 6 | 34-57 | Bs4-NBS    | 2  | 6007  | 6360  | E=1.40137e-76  |                                  |   |
|           | RH186H09-5-39315  |          | 6 | 34-57 | Bs4-LRR    | 1  | 6933  | 6982  | E=5.05558e-06  |                                  |   |
|           | RH186H09-5-39315  |          | 6 | 34-57 | Gro1-4-LRR | 2  | 7044  | 7449  | E=1.46686e-53  |                                  |   |
| Vid-CNL   | RH123P09-1-130082 | AC238222 | 6 | 46    | Rx1-CC     | 2  | 7716  | 7878  | E=3.49462e-31  | NBS profiling 5A6T21/9M2         | 1 |
|           | RH123P09-1-130082 |          | 6 | 46    | Gpa2-NBS   | 2  | 7849  | 8222  | E=1.78761e-141 |                                  |   |
|           | RH123P09-1-130082 |          | 6 | 46    | Rx1-LRR    | 3  | 8185  | 8618  | E=4.56829e-98  |                                  |   |
|           | RH123P09-1-130082 |          | 6 | 46    | Gpa2-CC    | 2  | 9166  | 9270  | E=4.6677e-27   |                                  | 1 |
|           | RH123P09-1-130082 |          | 6 | 46    | R1-LRR     | 2  | 11038 | 11266 | E=5.05743e-27  |                                  |   |
|           | RH123P09-1-130082 |          | 6 | 46    | Rx1-CC     | 1  | 13235 | 13279 | E=3.25971e-12  |                                  | 1 |
|           | RH123P09-1-130082 |          | 6 | 46    | Dm3-NBS    | 2  | 13463 | 13777 | E=2.4528e-13   |                                  |   |
|           | RH123P09-1-130082 |          | 6 | 46    | Rx1-LRR    | 2  | 13767 | 13941 | E=3.38463e-90  |                                  |   |
|           | RH123P09-1-130082 |          | 6 | 46    | Gpa2-LRR   | 1  | 13815 | 14066 | E=8.14778e-65  |                                  |   |
|           | RH123P09-1-130082 |          | 6 | 46    | Y-1-LRR    | -2 | 25788 | 26001 | E=2.66866e-08  |                                  |   |
|           | RH123P09-1-130082 |          | 6 | 46    | Gpa2-NBS   | 1  | 26176 | 26544 | E=9.54829e-89  |                                  | 1 |
|           | RH123P09-1-130082 |          | 6 | 46    | R1-LRR     | 1  | 26440 | 26923 | E=1.02134e-48  |                                  |   |
| VIIa-TNL  | RH142A12-6-47481  | AC240025 | 7 | 31-39 | N-Nt-TIR   | -1 | 9864  | 9885  | E=7.28264e-06  | RGH-SSR36                        | 1 |
|           | RH142A12-6-47481  |          | 7 | 31-39 | Gro1-4-TIR | -2 | 9917  | 9958  | E=4.74176e-09  |                                  |   |
|           | RH142A12-6-47481  |          | 7 | 31-39 | Gro1-4-TIR | -1 | 10092 | 10135 | E=4.03723e-07  |                                  |   |
|           | RH142A12-6-47481  |          | 7 | 31-39 | N-Nt-NBS   | -1 | 10097 | 10201 | E=1.12111e-09  |                                  |   |
|           | RH142A12-6-47481  |          | 7 | 31-39 | Gro1-4-NBS | -3 | 12846 | 13228 | E=0.0          |                                  |   |
|           | RH142A12-6-47481  |          | 7 | 31-39 | Gro1-4-LRR | -3 | 13236 | 13519 | E=1.92679e-62  |                                  |   |
|           | RH142A12-6-47481  |          | 7 | 31-39 | N-Nt-CNL   | -3 | 13372 | 13406 | E=0.00201862   |                                  |   |
|           | RH076N20-16-18297 | AC239996 | 7 | 31-39 | Gro1-4-LRR | 3  | 847   | 1007  | E=7.18024e-43  | potato physical map              | 1 |
|           | RH076N20-20-8779  |          | 7 | 31-39 | N-Nt-TIR   | 3  | 1344  | 1365  | E=7.28264e-06  |                                  | 1 |
|           | RH076N20-20-8779  |          | 7 | 31-39 | Gro1-4-TIR | 1  | 1360  | 1401  | E=4.0466e-09   |                                  | 1 |
|           | RH076N20-20-8779  |          | 7 | 31-39 | Gro1-4-TIR | 3  | 1572  | 1615  | E=3.65258e-17  |                                  |   |
|           | RH076N20-20-8779  |          | 7 | 31-39 | N-Nt-NBS   | 3  | 1577  | 1681  | E=1.12111e-09  |                                  |   |
|           | RH076N20-28-8599  |          | 7 | 31-39 | Gro1-4-TIR | -3 | 216   | 381   | E=2.49655e-92  |                                  | 1 |
|           | RH076N20-28-8599  |          | 7 | 31-39 | Gro1-4-NBS | -3 | 544   | 987   | E=0.0          |                                  |   |
|           | RH076N20-28-8599  |          | 7 | 31-39 | Gro1-4-LRR | -3 | 988   | 1525  | E=2.9068e-169  |                                  |   |
|           | RH076N20-28-8599  |          | 7 | 31-39 | WRR4-exon4 | -3 | 1078  | 1343  | E=1.98183e-13  |                                  |   |
|           | RH076N20-28-8599  |          | 7 | 31-39 | N-Nt-CNL   | -3 | 1395  | 1429  | E=0.00820026   |                                  |   |
|           | RH076N20-5-6261   |          | 7 | 31-39 | Gro1-4-LRR | -2 | 1     | 145   | E=1.94418e-31  |                                  | 1 |
|           | RH076N20-5-6261   |          | 7 | 31-39 | Gro1-4-LRR | -3 | 1661  | 1874  | E=3.04354e-68  |                                  |   |
|           | RH076N20-6-4434   |          | 7 | 31-39 | Gro1-4-NBS | -2 | 617   | 759   | E=6.62911e-57  |                                  | 1 |
|           | RH076N20-6-4434   |          | 7 | 31-39 | Gro1-4-LRR | -2 | 760   | 1190  | E=2.12326e-130 |                                  |   |
|           | RH076N20-6-4434   |          | 7 | 31-39 | Gro1-4-LRR | -3 | 1017  | 1223  | E=1.52944e-24  |                                  |   |
|           | RH076N20-9-2900   |          | 7 | 31-39 | Gro1-4-NBS | -3 | 426   | 808   | E=0.0          |                                  | 1 |
|           | RH076N20-9-2900   |          | 7 | 31-39 | Gro1-4-LRR | -3 | 816   | 887   | E=4.16265e-24  |                                  |   |
|           | RH190I20-1-107191 | AC240059 | 7 | 36    | Bs4-TIR    | 3  | 3519  | 3666  | E=8.57868e-50  | BACend tool                      | 1 |
|           | RH190I20-1-107191 |          | 7 | 36    | Gro1-4-NBS | 3  | 3853  | 4020  | E=8.49488e-65  |                                  |   |
|           | RH190I20-1-107191 |          | 7 | 36    | Gro1-4-NBS | 2  | 3990  | 4189  | E=1.32224e-92  |                                  |   |
|           | RH190I20-1-107191 |          | 7 | 36    | Gro1-4-LRR | 3  | 5078  | 5420  | E=5.39944e-134 |                                  |   |
|           | RH190I20-1-107191 |          | 7 | 36    | Gro1-4-LRR | 2  | 5366  | 5543  | E=8.03077e-31  |                                  |   |
|           | RH190I20-1-107191 |          | 7 | 36    | Gro1-4-TIR | 3  | 7291  | 7456  | E=1.18736e-94  |                                  | 1 |
|           | RH190I20-1-107191 |          | 7 | 36    | Gro1-4-TIR | 1  | 8672  | 8715  | E=1.8587e-16   |                                  |   |
|           | RH190I20-1-107191 |          | 7 | 36    | Gro1-4-NBS | 1  | 8716  | 9159  | E=0.0          |                                  |   |
|           | RH190I20-1-107191 |          | 7 | 36    | Gro1-4-LRR | 1  | 9160  | 9506  | E=2.78094e-149 |                                  |   |
|           | RH190I20-1-107191 |          | 7 | 36    | N-Nt-CNL   | 3  | 9619  | 9653  | E=0.00107068   |                                  |   |
|           | RH195I15-1-9781   | AC240062 | 7 | 36    | Gro1-4-LRR | 3  | 1418  | 1550  | E=1.0876e-20   | potato physical map              | 1 |
|           | RH195I15-9-46623  |          | 7 | 36    | Gro1-4-TIR | -2 | 1018  | 1177  | E=1.4793e-84   |                                  | 1 |
|           | RH195I15-9-46623  |          | 7 | 36    | Gro1-4-NBS | -2 | 1399  | 1841  | E=0.0          |                                  |   |
|           | RH195I15-9-46623  |          | 7 | 36    | P2-LRR     | -2 | 1840  | 1971  | E=1.46442e-08  |                                  |   |
|           | RH195I15-9-46623  |          | 7 | 36    | Gro1-4-LRR | -1 | 1947  | 2117  | E=9.57365e-58  |                                  |   |
|           | RH195I15-9-46623  |          | 7 | 36    | Gro1-4-LRR | -3 | 2101  | 2278  | E=6.95664e-37  |                                  |   |
|           | RH195I15-9-46623  |          | 7 | 36    | Gro1-4-TIR | -3 | 7105  | 7270  | E=2.77935e-96  |                                  | 1 |
|           | RH195I15-9-46623  |          | 7 | 36    | Gro1-4-NBS | -3 | 9858  | 10178 | E=0.0          |                                  |   |
|           | RH195I15-9-46623  |          | 7 | 36    | Gro1-4-LRR | -2 | 10271 | 10820 | E=0.0          |                                  |   |
| VIIb-CNL  | RH149L10-3-61769  | AC232101 | 7 | 61    | Rps5-NBS   | -3 | 14710 | 15015 | E=3.56267e-38  | BACend tool                      | 1 |
|           | RH149L10-3-61769  |          | 7 | 61    | Dm3-LRR    | -3 | 15079 | 15340 | E=8.9187e-06   |                                  |   |
|           | RH149L10-3-61769  |          | 7 | 61    | PM3b-LRR   | -2 | 15738 | 15803 | E=0.0312342    |                                  |   |
|           | RH149L10-3-61769  |          | 7 | 61    | Dm3-LRR    | -2 | 15966 | 16110 | E=7.73702e-07  |                                  |   |
|           | RH149L10-3-61769  |          | 7 | 61    | Dm3-LRR    | -1 | 16499 | 16601 | E=2.75022e-06  |                                  |   |
| VIIc-TNL  | RH202J02-10-16214 | AC240070 | 7 | 68-71 | Y-1-NBS    | 1  | 37    | 76    | E=0.00610877   | RGH-SSR50                        | 1 |
|           | RH202J02-10-16214 |          | 7 | 68-71 | Bs4-LRR    | 2  | 84    | 108   | E=0.000807136  |                                  |   |
|           | RH202J02-10-16214 |          | 7 | 68-71 | N-Nt-LRR   | 3  | 246   | 494   | E=1.09038e-79  |                                  |   |
|           | RH202J02-10-16214 |          | 7 | 68-71 | N-Nt-CNL   | 1  | 504   | 604   | E=8.14104e-28  |                                  |   |
|           | RH202J02-10-16214 |          | 7 | 68-71 | Bs4-TIR    | 2  | 1182  | 1230  | E=4.9181e-12   |                                  | 1 |
|           | RH202J02-10-16214 |          | 7 | 68-71 | Y-1-TIR    | 1  | 1204  | 1307  | E=5.92321e-42  |                                  |   |
|           | RH202J02-11-15710 |          | 7 | 68-71 | Y-1-TIR    | -3 | 4588  | 4734  | E=1.75952e-27  |                                  | 1 |
|           | RH202J02-11-15710 |          | 7 | 68-71 | Bs4-NBS    | -2 | 4888  | 4975  | E=8.31623e-35  |                                  |   |
|           | RH160G21-2-24541  | AC240041 | 7 |       | Bs4-TIR    | 1  | 2405  | 2562  | E=1.70576e-67  | RGH-SSR42 (SH07B066-073)         | 1 |
|           | RH160G21-2-24541  |          | 7 |       | Y-1-NBS    | 2  | 2653  | 2995  | E=7.54293e-139 |                                  |   |
|           | RH160G21-2-24541  |          | 7 |       | Gro1-4-NBS | 1  | 3141  | 3226  | E=4.39613e-06  |                                  |   |
|           | RH160G21-2-24541  |          | 7 |       | Bs4-LRR    | 1  | 3170  | 3224  | E=8.38112e-18  |                                  |   |
|           | RH160G21-2-24541  |          | 7 |       | N-Nt-LRR   | 2  | 3747  | 4050  | E=4.26672e-93  |                                  |   |
|           | RH160G21-2-24541  |          | 7 |       | N-Nt-CNL   | 2  | 4172  | 4326  | E=4.11285e-52  |                                  |   |
| VIIId-CNL | RH202J02-2-7875   |          | 7 | 68-71 | Gpa2-NBS   | 2  | 481   | 809   | E=7.20449e-82  |                                  | 1 |
|           | RH202J02-2-7875   |          | 7 | 68-71 | Bs2-LRR    | 2  | 873   | 1182  | E=5.92147e-44  |                                  |   |
|           | RH202J02-9-8907   |          | 7 | 68-71 | Gpa2-NBS   | 3  | 1958  | 2299  | E=4.39213e-91  |                                  | 1 |
|           | RH202J02-9-8907   |          | 7 | 68-71 | Bs2-LRR    | 3  | 2348  | 2661  | E=4.42825e-39  |                                  |   |
| VIIIa-TNL | RH031D17-11-9000  |          | 8 | 10-11 | Bs4-TIR    | -2 | 565   | 725   | E=6.10173e-74  | RGH-SSR7                         | 1 |
|           | RH031D17-11-9000  |          | 8 | 10-11 | Bs4-NBS    | -1 | 768   | 1143  | E=3.66496e-156 |                                  |   |

|           |                   |          |   |       |                 |    |       |       |                |                               |   |
|-----------|-------------------|----------|---|-------|-----------------|----|-------|-------|----------------|-------------------------------|---|
|           | RH031D17-11-9000  |          | 8 | 10-11 | Y-1-NBS         | -3 | 1186  | 1251  | E=3.73062e-06  |                               |   |
|           | RH031D17-11-9000  |          | 8 | 10-11 | Y-1-LRR         | -1 | 1478  | 1681  | E=1.14948e-64  |                               |   |
|           | RH031D17-11-9000  |          | 8 | 10-11 | N-Nt-LRR        | -3 | 1688  | 1833  | E=1.07061e-27  |                               |   |
|           | RH031D17-11-9000  |          | 8 | 10-11 | N-Nt-CNL        | -3 | 1850  | 2001  | E=1.98164e-38  |                               |   |
| VIIIb-CNL | RH031D17-1-3056   | AC237980 | 8 | 10-11 | Gpa2-CC         | -2 | 899   | 972   | E=0.00101245   |                               | 1 |
|           | RH031D17-13-30526 |          | 8 | 10-11 | Bs2-firsthalf   | -1 | 112   | 255   | E=3.23925e-35  |                               | 1 |
|           | RH031D17-13-30526 |          | 8 | 10-11 | Gpa2-CC         | -1 | 1611  | 1714  | E=0.00828958   |                               |   |
|           | RH031D17-14-30526 |          | 8 | 10-11 | Rp1D-NBS        | -1 | 1773  | 1819  | E=0.000796947  |                               |   |
|           | RH031D17-13-30526 |          | 8 | 10-11 | Tm2-2-LRR       | -1 | 3583  | 3668  | E=1.12491e-05  |                               |   |
|           | RH031D17-13-30526 |          | 8 | 10-11 | Gpa2-CC         | -2 | 5681  | 5804  | E=0.000788251  |                               | 1 |
|           | RH031D17-13-30526 |          | 8 | 10-11 | Gpa2-NBS        | -2 | 5801  | 6142  | E=5.46727e-84  |                               |   |
|           | RH031D17-13-30526 |          | 8 | 10-11 | Bs2-LRR         | -2 | 6131  | 6516  | E=2.4828e-49   |                               |   |
|           | RH031D17-15-9718  |          | 8 | 10-11 | Bs2-firsthalf   | -1 | 158   | 545   | E=8.52875e-63  |                               | 1 |
|           | RH031D17-15-9718  |          | 8 | 10-11 | Bs2-LRR         | -1 | 1692  | 2047  | E=3.55433e-49  |                               |   |
|           | RH031D17-2-5106   |          | 8 | 10-11 | Bs2-firsthalf   | -1 | 158   | 545   | E=4.12814e-62  |                               | 1 |
|           | RH031D17-2-5106   |          | 8 | 10-11 | R1-LRR          | -1 | 1560  | 1618  | E=3.40811e-07  |                               |   |
|           | RH031D17-2-22042  |          | 8 | 10-11 | Bs2-firsthalf   | -2 | 1402  | 1548  | E=3.6914e-16   |                               | 1 |
|           | RH031D17-6-22042  |          | 8 | 10-11 | Rx1-NBS         | -1 | 1563  | 1786  | E=5.90422e-61  |                               |   |
|           | RH031D17-6-22042  |          | 8 | 10-11 | R1-LRR          | -1 | 1692  | 2080  | E=6.9964e-30   |                               |   |
|           | RH031D17-6-22042  |          | 8 | 10-11 | Bs2-LRR         | -1 | 3914  | 4265  | E=4.96829e-45  |                               |   |
|           | RH031D17-6-22042  |          | 8 | 10-11 | Rps5-NBS        | -2 | 4297  | 4372  | E=0.000107307  |                               |   |
|           | RH031D17-6-22042  |          | 8 | 10-11 | Rx1-CC          | -2 | 4889  | 5056  | E=7.84411e-05  |                               | 1 |
|           | RH031D17-6-22042  |          | 8 | 10-11 | Gpa2-NBS        | -3 | 4944  | 5186  | E=1.2583e-57   |                               |   |
|           | RH031D17-6-22042  |          | 8 | 10-11 | R1-LRR          | -3 | 5080  | 5313  | E=4.97374e-27  |                               |   |
|           | RH031D17-6-22042  |          | 8 | 10-11 | Bs2-LRR         | -2 | 5473  | 5655  | E=5.60499e-32  |                               |   |
|           | RH011D17-2-30147  | AC239966 | 8 | 10-11 | Rx1-CC          | 3  | 3369  | 3536  | E=1.34874e-34  | potato physical map           | 1 |
|           | RH011D17-2-30147  |          | 8 | 10-11 | Gpa2-NBS        | 3  | 3510  | 3864  | E=1.2143e-151  |                               |   |
|           | RH011D17-2-30147  |          | 8 | 10-11 | Rx1-LRR         | 3  | 3848  | 4236  | E=2.79489e-66  |                               |   |
|           | RH023L12-6-15001  | AC239971 | 8 | 10-11 | Rx1-CC          | 2  | 1263  | 1430  | E=1.34874e-34  | potato physical map           | 1 |
|           | RH023L12-6-15001  |          | 8 | 10-11 | Gpa2-NBS        | 2  | 1404  | 1758  | E=2.96522e-151 |                               |   |
|           | RH023L12-6-15001  |          | 8 | 10-11 | Gpa2-LRR        | 2  | 1808  | 2143  | E=1.57418e-66  |                               |   |
| VIIIc-CNL | RH204B22-12-1530  | AC240072 | 8 | 20    | Rpi-blb2-CC     | -3 | 1     | 389   | E=3.77651e-133 | potato physical map           | 1 |
|           | RH204B22-12-1530  |          | 8 | 20    | Rpi-blb2-NBS    | -3 | 390   | 492   | E=1.0556e-44   |                               |   |
|           | RH204B22-2-1993   |          | 8 | 20    | Rpi-blb2-LRR    | 1  | 1     | 173   | E=4.23794e-54  |                               | 1 |
|           | RH204B22-2-1993   |          | 8 | 20    | CaMi-LRR        | 3  | 153   | 215   | E=3.76419e-18  |                               |   |
|           | RH204B22-2-1993   |          | 8 | 20    | Rpi-blb2-LRR    | 2  | 205   | 303   | E=5.90366e-33  |                               |   |
|           | RH204B22-37-1872  |          | 8 | 20    | Mi-1-CC         | -3 | 302   | 582   | E=7.39272e-120 |                               | 1 |
|           | RH129B02-10-16431 | AC240016 | 8 | 21-22 | Rpi-blb2-CC     | 3  | 4699  | 5000  | E=9.58259e-87  | potato physical map           | 1 |
|           | RH129B02-10-16431 |          | 8 | 21-22 | Rpi-blb2-CC     | 2  | 4999  | 5031  | E=1.36891e-07  |                               |   |
|           | RH129B02-10-16431 |          | 8 | 21-22 | Rpi-blb2-NBS    | 3  | 5114  | 5208  | E=9.33312e-38  |                               |   |
|           | RH129B02-11-15577 |          | 8 | 21-22 | Rpi-blb2-NBS    | -1 | 1     | 120   | E=6.75439e-31  |                               | 1 |
|           | RH129B02-11-15577 |          | 8 | 21-22 | Rpi-blb2-LRR    | -1 | 121   | 377   | E=3.56276e-77  |                               |   |
|           | RH129B02-11-15577 |          | 8 | 21-22 | Rpi-blb2-LRR    | -3 | 349   | 446   | E=2.03024e-31  |                               |   |
| IXa-CNL   | RH050N09-2-83184  | AC238036 | 9 | 19-23 | Rx1-LRR         | 2  | 1788  | 1990  | E=2.02736e-51  | NBS blast                     | 1 |
|           | RH050N09-2-83184  |          | 9 | 19-23 | Rx1-NBS         | 1  | 5202  | 5224  | E=0.00290541   |                               | 1 |
|           | RH050N09-2-83184  |          | 9 | 19-23 | Gpa2-CC         | 3  | 5328  | 5394  | E=1.33988e-15  |                               | 1 |
|           | RH050N09-2-83184  |          | 9 | 19-23 | Rx1-NBS         | 2  | 5402  | 5446  | E=9.49541e-05  |                               |   |
|           | RH050N09-2-83184  |          | 9 | 19-23 | Rx1-CC          | -3 | 21551 | 21715 | E=2.18889e-33  |                               | 1 |
|           | RH050N09-2-83184  |          | 9 | 19-23 | Gpa2-NBS        | -3 | 21687 | 22046 | E=3.68145e-153 |                               |   |
|           | RH050N09-2-83184  |          | 9 | 19-23 | R1-LRR          | -3 | 21932 | 22049 | E=8.16088e-17  |                               |   |
|           | RH050N09-2-83184  |          | 9 | 19-23 | Gpa2-LRR        | -1 | 22434 | 22662 | E=5.96495e-47  |                               |   |
|           | RH050N09-2-83184  |          | 9 | 19-23 | Gpa2-LRR        | -2 | 22612 | 22739 | E=1.6527e-42   |                               |   |
| IXb-CNL   | RH170E13-14-8367  | AC240047 | 9 | 31-32 | R3a-CC          | -3 | 2005  | 2076  | E=8.31107e-07  | RGH-CAPS13                    | 1 |
|           | RH170E13-14-8367  |          | 9 | 31-32 | R3a-NBS         | -3 | 2077  | 2122  | E=4.3832e-09   |                               |   |
|           | RH170E13-16-3970  |          | 9 | 31-32 | R3a-LRR         | -3 | 682   | 769   | E=3.3878e-27   |                               | 1 |
|           | RH170E13-16-3970  |          | 9 | 31-32 | R3a-LRR         | -2 | 766   | 985   | E=3.02705e-70  |                               |   |
|           | RH170E13-9-6696   |          | 9 | 31-32 | R3a-CC          | -1 | 307   | 421   | E=8.6395e-46   |                               | 1 |
|           | RH170E13-9-6696   |          | 9 | 31-32 | R3a-NBS         | -3 | 397   | 737   | E=1.46878e-154 |                               |   |
|           | RH170E13-9-6696   |          | 9 | 31-32 | R3a-LRR         | -3 | 738   | 825   | E=1.9679e-30   |                               |   |
|           | RH170E13-9-6696   |          | 9 | 31-32 | I2-LRR          | -1 | 808   | 1144  | E=1.3324e-138  |                               |   |
| IXc-CNL   | RH053N17-6-39147  | AC239983 | 9 | 34    | Rpi-blb2-CC     | -3 | 478   | 771   | E=8.27553e-46  | RGH-SSR13                     | 1 |
|           | RH053N17-6-39147  |          | 9 | 34    | Rpi-blb2-CC     | -2 | 698   | 919   | E=4.76437e-51  |                               |   |
|           | RH053N17-6-39147  |          | 9 | 34    | Rpi-blb2-NBS    | -1 | 937   | 1222  | E=4.55607e-94  |                               |   |
|           | RH053N17-6-39147  |          | 9 | 34    | Mi-1-LRR        | -2 | 1261  | 1440  | E=7.33179e-34  |                               |   |
|           | RH053N17-6-39147  |          | 9 | 34    | CaMi-LRR        | -3 | 1450  | 1573  | E=2.24261e-20  |                               |   |
|           | RH068C04-11-11046 | AC239989 | 9 |       | Rpi-blb1-NBS    | 1  | 82    | 284   | E=2.33902e-48  | marker blast (cLPT-4-C24_210) | 1 |
|           | RH068C04-11-11046 |          | 9 |       | HRT-DomainF-LRR | 3  | 271   | 353   | E=0.00300015   |                               |   |
|           | RH068C04-3-7251   |          | 9 |       | Rpi-blb1-CC     | 1  | 744   | 832   | E=2.15333e-07  |                               | 1 |
|           | RH068C04-5-38484  |          | 9 |       | Rpi-blb1-CC     | -3 | 399   | 605   | E=2.09888e-09  |                               | 1 |
|           | RH068C04-5-38484  |          | 9 |       | Rpi-blb1-NBS    | -3 | 617   | 935   | E=6.26576e-74  |                               |   |
|           | RH068C04-5-38484  |          | 9 |       | I2-LRR          | -3 | 971   | 1349  | E=5.56536e-42  |                               |   |
|           | RH122G20-12-1959  | AC240010 | 9 |       | I2-LRR          | 2  | 52    | 430   | E=2.37757e-40  | potato physical map           | 1 |
|           | RH172G12-17-994   | AC240048 | 9 |       | Rpi-blb1-CC     | -3 | 14    | 220   | E=1.18089e-07  | potato physical map           | 1 |
|           | RH172G12-17-994   |          | 9 |       | I2-NBS          | -3 | 197   | 287   | E=1.40059e-14  |                               |   |
|           | RH186C17-1-102618 | AC240057 | 9 |       | Rpi-blb2-CC     | 2  | 22676 | 23194 | E=3.55217e-114 | marker blast (TG254)          | 1 |
|           | RH186C17-1-102618 |          | 9 |       | Rpi-blb2-NBS    | 2  | 23196 | 23547 | E=3.49836e-113 |                               |   |
|           | RH186C17-1-102618 |          | 9 |       | Mi-1-LRR        | 2  | 23552 | 23888 | E=4.25738e-67  |                               |   |
|           | RH154J09-3-57060  | AC240037 | 9 |       | Rpi-blb2-CC     | 1  | 3286  | 3804  | E=3.18703e-114 | potato physical map           | 1 |
|           | RH154J09-3-57060  |          | 9 |       | Rpi-blb2-NBS    | 1  | 3806  | 4157  | E=1.0264e-112  |                               |   |
|           | RH154J09-3-57060  |          | 9 |       | CaMi-LRR        | 1  | 4162  | 4498  | E=8.54803e-67  |                               |   |
| IXd-CNL   | RH002E09-3-95796  | AC237905 | 9 | 38    | Tm2-2-NBS       | -2 | 3225  | 3274  | E=1.70927e-07  | RGH-CAPS2                     | 1 |
|           | RH002E09-3-95796  |          | 9 | 38    | Tm2-2-NBS       | -1 | 3599  | 3684  | E=3.67646e-13  |                               |   |
|           | RH002E09-3-95796  |          | 9 | 38    | Tm2-NBS         | -3 | 3701  | 3748  | E=3.61352e-15  |                               |   |
|           | RH002E09-3-95796  |          | 9 | 38    | Tm2-LRR         | -2 | 3752  | 3918  | E=1.00279e-56  |                               |   |
| IXe-CNL   | RH140F06-3-6613   | AC240023 | 9 | 41-50 | Sw-5-NBS        | 3  | 1402  | 1666  | E=3.87659e-58  | RGH-SSR34                     | 1 |
|           | RH140F06-8-3264   |          | 9 | 41-50 | Sw-5-NBS        | -1 | 449   | 626   | E=2.24155e-48  |                               | 1 |
|           | RH140F06-8-3264   |          | 9 | 41-50 | Sw-5-LRR        | -1 | 626   | 864   | E=1.06819e-17  |                               |   |
|           | RH195J15-1-9671   | AC240063 | 9 | 41-50 | Sw-5-NBS        | 1  | 2     | 52    | E=1.31611e-14  | RGH-SSR49                     | 1 |
|           | RH195J15-1-9671   |          | 9 | 41-50 | Sw-5-LRR        | 3  | 92    | 181   | E=2.74631e-12  |                               |   |
|           | RH195J15-1-9671   |          | 9 | 41-50 | Sw-5-LRR        | 1  | 203   | 287   | E=4.35064e-08  |                               |   |
|           | RH195J15-3-15151  |          | 9 | 41-50 | Sw-5-NBS        | -1 | 3887  | 4045  | E=3.62838e-56  |                               | 1 |
|           | RH195J15-3-15151  |          | 9 | 41-50 | Sw-5-NBS        | -3 | 4064  | 4128  | E=5.25492e-16  |                               |   |
|           | RH195J15-3-15151  |          | 9 | 41-50 | Sw-5-LRR        | -3 | 4127  | 4360  | E=6.76047e-13  |                               |   |
|           | RH195J15-7-10111  |          | 9 | 41-50 | Sw-5-NBS        | -1 | 1669  | 1738  | E=5.89578e-22  |                               | 1 |
|           | RH195J15-7-10111  |          | 9 | 41-50 | Sw-5-NBS        | -3 | 2718  | 2798  | E=9.0675e-05   |                               |   |
|           | RH195J15-7-10111  |          | 9 | 41-50 | Prf-NBS         | -1 | 2779  | 2870  | E=5.68171e-12  |                               |   |
|           | RH195J15-7-10111  |          | 9 | 41-50 | Sw-5-LRR        | -3 | 2873  | 2962  | E=2.72349e-12  |                               |   |

|                  |                   |          |          |              |             |             |               |                |                |                     |                     |   |
|------------------|-------------------|----------|----------|--------------|-------------|-------------|---------------|----------------|----------------|---------------------|---------------------|---|
|                  | RH195J15-7-10111  |          | 9        | 41-50        | Sw-5-LRR    | -1          | 3021          | 3105           | E=5.31522e-08  |                     |                     |   |
| IXf-CNL          | RH058D13-1-26272  | AC237842 | 9        | 84           | Sw-5-CC     | 3           | 1381          | 1775           | E=3.01914e-130 | BACend tool         | 1                   |   |
|                  | RH058D13-1-26272  |          | 9        | 84           | Rpi-blb2-CC | 2           | 1815          | 2351           | E=2.24596e-26  |                     |                     |   |
|                  | RH058D13-1-26272  |          | 9        | 84           | R1-NBS      | 2           | 2357          | 2559           | E=2.22461e-42  |                     |                     |   |
|                  | RH058D13-1-26272  |          | 9        | 84           | Sw-5-NBS    | 1           | 2511          | 2627           | E=3.23679e-47  |                     |                     |   |
|                  | RH058D13-1-26272  |          | 9        | 84           | Sw-5-NBS    | 3           | 2663          | 2713           | E=6.21645e-12  |                     |                     |   |
|                  | RH058D13-1-26272  |          | 9        | 84           | Sw-5-LRR    | 3           | 2714          | 2793           | E=2.78929e-16  |                     |                     |   |
|                  | RH058D13-1-26272  |          | 9        | 84           | Hero-LRR    | 2           | 2847          | 3043           | E=3.66152e-14  |                     |                     |   |
|                  | RH058D13-1-26272  |          | 9        | 84           | Sw-5-CC     | 2           | 4345          | 4879           | E=0.0          |                     | 1                   |   |
|                  | RH058D13-1-26272  |          | 9        | 84           | Sw-5-NBS    | 2           | 4880          | 5257           | E=0.0          |                     |                     |   |
|                  | RH058D13-1-26272  |          | 9        | 84           | Sw-5-LRR    | 2           | 5258          | 5596           | E=5.0153e-122  |                     |                     |   |
|                  | RH058D13-1-26272  |          | 9        | 84           | Sw-5-LRR    | 1           | 6890          | 7061           | E=7.93283e-37  |                     |                     |   |
|                  | RH058D13-2-22867  |          | 9        | 84           | Sw-5-CC     | -2          | 1532          | 2071           | E=0.0          |                     | 1                   |   |
|                  | RH058D13-2-22867  |          | 9        | 84           | Sw-5-NBS    | -2          | 2073          | 2455           | E=3.06727e-175 |                     |                     |   |
|                  | RH058D13-2-22867  |          | 9        | 84           | Sw-5-LRR    | -2          | 2500          | 2821           | E=7.60552e-96  |                     |                     |   |
|                  | RH058D13-4-29121  |          | 9        | 84           | Sw-5-LRR    | 3           | 445           | 630            | E=1.37223e-74  |                     | 1                   |   |
|                  | RH058D13-4-29121  |          | 9        | 84           | Hero-LRR    | 2           | 2125          | 2261           | E=4.90188e-15  |                     |                     |   |
|                  | RH058D13-4-29121  |          | 9        | 84           | Sw-5-CC     | 1           | 2971          | 3478           | E=0.0          |                     | 1                   |   |
|                  | RH058D13-4-29121  |          | 9        | 84           | Sw-5-NBS    | 1           | 3479          | 3855           | E=0.0          |                     |                     |   |
|                  | RH058D13-4-29121  |          | 9        | 84           | Sw-5-LRR    | 1           | 3856          | 4194           | E=1.34164e-123 |                     |                     |   |
|                  | RH058D13-4-29121  |          | 9        | 84           | Sw-5-CC     | 2           | 5624          | 6160           | E=0.0          |                     | 1                   |   |
|                  | RH058D13-4-29121  |          | 9        | 84           | Sw-5-NBS    | 2           | 6161          | 6538           | E=0.0          |                     |                     |   |
|                  | RH058D13-4-29121  |          | 9        | 84           | Sw-5-LRR    | 2           | 6539          | 6865           | E=1.30733e-126 |                     |                     |   |
|                  | RH058D13-5-7526   |          | 9        | 84           | Sw-5-CC     | -3          | 1497          | 2041           | E=0.0          |                     | 1                   |   |
|                  | RH058D13-5-7526   |          | 9        | 84           | Sw-5-NBS    | -3          | 2043          | 2398           | E=3.4742e-177  |                     |                     |   |
|                  | RH100A18-10-21272 |          | AC238190 | 9            | 84          | Sw-5-CC     | -2            | 1305           | 1857           | E=0.0               | RGH-SSR28 (SH)      | 1 |
|                  | RH100A18-10-21272 |          |          | 9            | 84          | Sw-5-NBS    | -3            | 1836           | 2193           | E=1.31417e-163      |                     |   |
|                  | RH100A18-10-21272 |          |          | 9            | 84          | Sw-5-LRR    | -3            | 2232           | 2558           | E=2.51008e-92       |                     |   |
|                  | RH100A18-4-16632  |          |          | 9            | 84          | Sw-5-CC     | 1             | 387            | 921            | E=0.0               |                     | 1 |
|                  | RH100A18-4-16632  |          |          | 9            | 84          | Sw-5-NBS    | 1             | 922            | 1299           | E=0.0               |                     |   |
|                  | RH100A18-4-16632  |          |          | 9            | 84          | Sw-5-LRR    | 1             | 1300           | 1638           | E=8.55233e-123      |                     |   |
|                  | RH100A18-4-16632  |          |          | 9            | 84          | Sw-5-LRR    | 2             | 1866           | 2088           | E=4.16294e-45       |                     |   |
|                  | RH100A18-4-16632  |          |          | 9            | 84          | Sw-5-CC     | 3             | 2957           | 3493           | E=0.0               |                     | 1 |
|                  | RH100A18-4-16632  |          |          | 9            | 84          | Sw-5-NBS    | 3             | 3494           | 3871           | E=0.0               |                     |   |
|                  | RH100A18-4-16632  |          |          | 9            | 84          | Sw-5-LRR    | 3             | 3872           | 4198           | E=2.95973e-128      |                     |   |
|                  | RH100A18-5-28283  |          |          | 9            | 84          | Sw-5-CC     | 1             | 3288           | 3832           | E=0.0               |                     | 1 |
|                  | RH100A18-5-28283  |          |          | 9            | 84          | Sw-5-NBS    | 1             | 3833           | 4210           | E=0.0               |                     |   |
|                  | RH100A18-5-28283  |          |          | 9            | 84          | Sw-5-LRR    | 1             | 4211           | 4548           | E=2.68335e-92       |                     |   |
|                  | RH100A18-5-28283  |          |          | 9            | 84          | Sw-5-CC     | 3             | 4747           | 5020           | E=3.17915e-67       |                     | 1 |
|                  | RH100A18-5-28283  |          |          | 9            | 84          | Sw-5-NBS    | 3             | 5429           | 5620           | E=8.22584e-82       |                     |   |
|                  | RH100A18-5-28283  |          |          | 9            | 84          | Sw-5-LRR    | 3             | 5621           | 5962           | E=3.94795e-84       |                     |   |
|                  | RH100A18-6-13119  |          |          | 9            | 84          | Sw-5-CC     | -2            | 1447           | 1713           | E=5.61009e-65       |                     | 1 |
|                  | RH100A18-6-13119  |          |          | 9            | 84          | Sw-5-CC     | -1            | 1694           | 1860           | E=1.09519e-59       |                     |   |
|                  | RH100A18-6-13119  |          |          | 9            | 84          | Sw-5-CC     | -3            | 2213           | 2734           | E=4.5715e-138       |                     |   |
|                  | RH100A18-6-13119  |          |          | 9            | 84          | Sw-5-NBS    | -1            | 2769           | 3084           | E=4.2977e-134       |                     |   |
|                  | RH100A18-6-13119  |          |          | 9            | 84          | Sw-5-LRR    | -1            | 3085           | 3311           | E=1.07832e-42       |                     |   |
| RH100A18-6-13119 | 9                 | 84       |          | Sw-5-LRR     | -3          | 3282        | 3335          | E=8.68585e-12  |                |                     |                     |   |
| RH100A18-8-8431  | 9                 | 84       |          | Nrc1-NBS     | 1           | 548         | 603           | E=2.46675e-08  |                | 1                   |                     |   |
| RH100A18-8-8431  | 9                 | 84       |          | Sw-5-CC      | -2          | 591         | 1149          | E=0.0          |                | 1                   |                     |   |
| RH100A18-8-8431  | 9                 | 84       |          | Sw-5-NBS     | -2          | 1151        | 1520          | E=1.44794e-174 |                |                     |                     |   |
| RH100A18-8-8431  | 9                 | 84       |          | Sw-5-LRR     | -2          | 1521        | 1847          | E=1.7952e-97   |                |                     |                     |   |
| RH100A18-8-8431  | 9                 | 84       |          | Sw-5-CC      | -1          | 2220        | 2255          | E=0.000173169  |                | 1                   |                     |   |
| RH152G12-1-24899 | AC232105          | 9        |          | 84           | Nrc1-NBS    | 1           | 1670          | 1707           | E=1.93828e-05  | BACend tool         | 1                   |   |
| RH152G12-1-24899 |                   | 9        |          | 84           | Sw-5-CC     | -3          | 3737          | 3758           | E=0.0144212    |                     | 1                   |   |
| RH152G12-1-24899 |                   | 9        |          | 84           | Sw-5-CC     | -2          | 4691          | 5220           | E=0.0          |                     |                     |   |
| RH152G12-1-24899 |                   | 9        |          | 84           | Sw-5-NBS    | -2          | 5222          | 5590           | E=5.59474e-174 |                     |                     |   |
| RH152G12-1-24899 |                   | 9        |          | 84           | Sw-5-LRR    | -2          | 5591          | 5917           | E=2.2488e-97   |                     |                     |   |
| RH152G12-2-27347 |                   | 9        |          | 84           | Nrc1-NBS    | 2           | 2391          | 2443           | E=0.000105443  |                     | 1                   |   |
| RH152G12-2-27347 |                   | 9        |          | 84           | Sw-5-CC     | -2          | 2941          | 3485           | E=0.0          |                     | 1                   |   |
| RH152G12-2-27347 |                   | 9        |          | 84           | Sw-5-NBS    | -2          | 3486          | 3863           | E=0.0          |                     |                     |   |
| RH152G12-2-27347 |                   | 9        |          | 84           | Sw-5-LRR    | -2          | 3864          | 4201           | E=2.44803e-92  |                     |                     |   |
| RH152G12-2-27347 |                   | 9        |          | 84           | Sw-5-CC     | -1          | 4443          | 4716           | E=2.06006e-67  |                     | 1                   |   |
| RH152G12-2-27347 |                   | 9        |          | 84           | Sw-5-NBS    | -1          | 5125          | 5316           | E=7.63075e-82  |                     |                     |   |
| RH152G12-2-27347 |                   | 9        |          | 84           | Sw-5-LRR    | -1          | 5317          | 5658           | E=3.91515e-84  |                     |                     |   |
| RH199H05-1-38310 |                   | AC240065 |          | 9            | 84          | Rpi-blb2-CC | 2             | 1155           | 1697           | E=4.23692e-24       | potato physical map | 1 |
| RH199H05-1-38310 |                   |          |          | 9            | 84          | Gpa2-NBS    | 2             | 1680           | 2028           | E=8.32412e-73       |                     |   |
| RH199H05-1-38310 |                   |          |          | 9            | 84          | R1-LRR      | 2             | 1920           | 2377           | E=9.98983e-39       |                     |   |
| RH199H05-1-38310 | 9                 |          |          | 84           | Sw-5-CC     | 1           | 4297          | 4810           | E=0.0          |                     | 1                   |   |
| RH199H05-1-38310 | 9                 |          |          | 84           | Sw-5-NBS    | 1           | 4811          | 4943           | E=6.93985e-64  |                     |                     |   |
| RH199H05-1-38310 | 9                 |          |          | 84           | Tm2-LRR     | 3           | 5024          | 5076           | E=3.55675e-06  |                     |                     |   |
| RH199H05-1-38310 | 9                 |          | 84       | Sw-5-LRR     | 3           | 5119        | 5447          | E=3.35336e-129 |                |                     |                     |   |
| RH199H05-1-38310 | 9                 |          | 84       | Sw-5-CC      | 3           | 6165        | 6408          | E=2.69834e-57  |                | 1                   |                     |   |
| RH199H05-1-38310 | 9                 |          | 84       | Rpi-blb2-CC  | 1           | 6419        | 6755          | E=7.35297e-22  |                |                     |                     |   |
| RH199H05-1-38310 | 9                 |          | 84       | Sw-5-NBS     | 3           | 6735        | 7086          | E=1.08935e-177 |                |                     |                     |   |
| RH199H05-1-38310 | 9                 |          | 84       | R1-LRR       | 3           | 6945        | 7400          | E=2.47473e-46  |                |                     |                     |   |
| RH199H05-1-38310 | 9                 |          | 84       | Sw-5-CC      | 2           | 8170        | 8704          | E=0.0          |                | 1                   |                     |   |
| RH199H05-1-38310 | 9                 |          | 84       | Sw-5-NBS     | 2           | 8705        | 9082          | E=0.0          |                |                     |                     |   |
| RH199H05-1-38310 | 9                 |          | 84       | Sw-5-LRR     | 2           | 9083        | 9414          | E=5.43751e-131 |                |                     |                     |   |
| RH199H05-2-8958  | 9                 |          | 84       | Sw-5-LRR     | 3           | 394         | 540           | E=1.01567e-47  |                | 1                   |                     |   |
| RH199H05-2-8958  | 9                 |          | 84       | Sw-5-CC      | 2           | 1269        | 1776          | E=0.0          |                | 1                   |                     |   |
| RH199H05-2-8958  | 9                 |          | 84       | Sw-5-NBS     | 2           | 1777        | 2153          | E=0.0          |                |                     |                     |   |
| RH199H05-2-8958  | 9                 |          | 84       | Sw-5-LRR     | 2           | 2154        | 2492          | E=3.0655e-122  |                |                     |                     |   |
| RH199H05-3-80548 | 9                 |          | 84       | CaMi-CC      | 2           | 11404       | 11443         | E=0.00209742   |                | 1                   |                     |   |
| RH199H05-3-80548 | 9                 |          | 84       | Sw-5-NBS     | 2           | 11418       | 11764         | E=3.59488e-88  |                |                     |                     |   |
| RH199H05-3-80548 | 9                 |          | 84       | R1-LRR       | 2           | 11646       | 12158         | E=2.17363e-33  |                |                     |                     |   |
| RH199H05-3-80548 | 9                 |          | 84       | CaMi-CC      | 3           | 14093       | 14144         | E=0.0188236    |                | 1                   |                     |   |
| RH199H05-3-80548 | 9                 |          | 84       | Sw-5-NBS     | 3           | 14119       | 14448         | E=3.53846e-85  |                |                     |                     |   |
| RH199H05-3-80548 | 9                 |          | 84       | R1-LRR       | 3           | 14347       | 14840         | E=2.65632e-32  |                |                     |                     |   |
| RH199H05-3-80548 | 9                 |          | 84       | Sw-5-LRR     | 1           | 15556       | 15619         | E=0.0384551    |                |                     |                     |   |
| RH199H05-3-80548 | 9                 |          | 84       | Rcy1-DomainC | 2           | 16735       | 16825         | E=5.54556e-10  |                |                     |                     |   |
| RH199H05-3-80548 | 9                 |          | 84       | Tm2-2-LRR    | 2           | 18527       | 18575         | E=0.00453437   |                |                     |                     |   |
| RH199H05-3-80548 | 9                 | 84       | CaMi-LRR | 2            | 18655       | 18998       | E=3.57519e-23 |                |                |                     |                     |   |
| RH199H05-5-3528  | 9                 | 84       | Sw-5-LRR | 2            | 3           | 124         | E=7.90758e-48 |                | 1              |                     |                     |   |
| Xa-CNL           | RH049J10-1-14175  | AC239981 | 10       | 1            | Dm3-LRR     | 1           | 776           | 914            | E=2.68146e-07  | potato physical map | 1                   |   |
|                  | RH049J10-1-14175  |          | 10       | 1            | Dm3-NBS     | 3           | 4222          | 4518           | E=1.021e-43    |                     | 1                   |   |
|                  | RH049J10-3-1833   |          | 10       | 1            | Dm3-NBS     | -3          | 24            | 340            | E=1.42428e-46  |                     | 1                   |   |
|                  | RH049J10-4-1752   |          | 10       | 1            | Dm3-LRR     | -2          | 393           | 542            | E=1.1739e-07   |                     | 1                   |   |
|                  | RH049J10-7-11434  |          | 10       | 1            | Rps5-NBS    | 1           | 1             | 95             | E=8.0545e-16   |                     | 1                   |   |

|         |                   |          |    |                |    |       |       |                |                                  |   |
|---------|-------------------|----------|----|----------------|----|-------|-------|----------------|----------------------------------|---|
|         | RH200E19-12-10660 | AC240066 | 10 | Dm3-LRR        | 3  | 74    | 187   | E=9.45238e-07  | marker blast (T1482)             | 1 |
|         | RH200E19-12-10660 |          | 10 | Rps2-LRR       | 2  | 454   | 617   | E=3.69325e-08  |                                  |   |
|         | RH200E19-13-2620  |          | 10 | Dm3-LRR        | 1  | 291   | 457   | E=8.69571e-07  |                                  | 1 |
|         | RH200E19-13-2620  |          | 10 | Dm3-Nterminus  | 1  | 579   | 739   | E=2.1034e-05   |                                  | 1 |
|         | RH200E19-13-2620  |          | 10 | Rps5-NBS       | 1  | 737   | 834   | E=2.79797e-08  |                                  |   |
|         | RH200E19-15-3965  |          | 10 | Dm3-NBS        | 3  | 423   | 700   | E=6.09877e-37  |                                  | 1 |
|         | RH200E19-15-3965  |          | 10 | Dm3-LRR        | 3  | 749   | 966   | E=0.00126691   |                                  |   |
|         | RH033P04-1-107735 | AC237833 | 10 | P2-NBS         | 3  | 27610 | 27695 | E=0.00329626   | BACend tool                      | 1 |
|         | RH033P04-1-107735 |          | 10 | CaMi-NBS       | 1  | 27790 | 28026 | E=0.00545783   |                                  |   |
|         | RH033P04-1-107735 |          | 10 | Rps2-LRR       | 1  | 28005 | 28331 | E=1.30228e-06  |                                  |   |
|         | RH033P04-1-107735 |          | 10 | Dm3-NBS        | 1  | 32227 | 32539 | E=7.87162e-49  |                                  | 1 |
|         | RH033P04-1-107735 |          | 10 | Dm3-LRR        | 1  | 32576 | 32854 | E=2.44773e-05  |                                  |   |
|         | RH033P04-1-107735 |          | 10 | Rps2-LRR       | 2  | 32949 | 33151 | E=5.42121e-08  |                                  |   |
|         | RH033P04-2-11632  |          | 10 | Rps5-LRR       | 2  | 619   | 756   | E=0.000176089  |                                  | 1 |
|         | RH033P04-2-11632  |          | 10 | Dm3-LRR        | 3  | 799   | 912   | E=9.45238e-07  |                                  |   |
|         | RH033P04-2-11632  |          | 10 | Rps2-LRR       | 2  | 1199  | 1362  | E=3.69325e-08  |                                  |   |
|         | RH033P04-3-9633   |          | 10 | Dm3-NBS        | 1  | 2828  | 3004  | E=3.25265e-18  |                                  | 1 |
|         | RH168B16-1-39951  | AC237875 | 10 | Dm3-NBS        | -1 | 175   | 490   | E=5.27387e-49  | BACend tool                      | 1 |
|         | RH168B16-1-39951  |          | 10 | Dm3-LRR        | -1 | 527   | 786   | E=1.53227e-09  |                                  |   |
|         | RH168B16-1-39951  |          | 10 | Dm3-LRR        | -3 | 2058  | 2193  | E=3.83651e-09  |                                  |   |
|         | RH168B16-1-39951  |          | 10 | Rps2-LRR       | -1 | 2576  | 2707  | E=8.08919e-09  |                                  |   |
| Xb-CNL  | RH074E19-7-1928   | AC239980 | 10 | 62-63 Rps5-NBS | -3 | 127   | 308   | E=2.02888e-23  | RGH-SSR19                        | 1 |
|         | RH088N19-11-14836 | AC240000 | 10 | 62-63 Rps5-NBS | 1  | 2693  | 2820  | E=2.81814e-12  | RGH-SSR24                        | 1 |
|         | RH088N19-6-6733   |          | 10 | 62-63 Rps5-NBS | 3  | 1362  | 1450  | E=7.66786e-13  |                                  | 1 |
|         | RH088N19-8-7681   |          | 10 | 62-63 Rps5-NBS | 3  | 924   | 1012  | E=7.66786e-13  |                                  | 1 |
| Xc-TNL  | RH015F14-1-21596  | AC237826 | 10 | 66 Bs4-LRR     | -1 | 4540  | 4854  | E=0.000159941  | potato physical map/BACend tool  | 1 |
|         | RH015F14-1-21596  |          | 10 | 66 N-Nt-LRR    | -1 | 4900  | 5022  | E=0.0128455    |                                  |   |
| Xd-CNL  | RH059J13-7-10183  | AC239987 | 10 | I2-CC          | 3  | 1262  | 1423  | E=1.47921e-62  | marker blast (T1681)             | 1 |
|         | RH059J13-7-10183  |          | 10 | R3a-NBS        | 3  | 1424  | 1755  | E=4.20737e-179 |                                  |   |
|         | RH059J13-7-10183  |          | 10 | R1-LRR         | 3  | 1675  | 1737  | E=0.00681992   |                                  |   |
|         | RH059J13-7-10183  |          | 10 | I2-LRR         | 1  | 1769  | 2551  | E=0.0          |                                  |   |
|         | RH059J13-8-14843  |          | 10 | R3a-LRR        | 3  | 1984  | 2200  | E=2.01415e-65  |                                  | 1 |
|         | RH059J13-8-14843  |          | 10 | I2-LRR         | 1  | 2196  | 2333  | E=2.01448e-36  |                                  |   |
|         | RH059J13-8-14843  |          | 10 | I2-LRR         | 2  | 2349  | 2483  | E=7.99967e-28  |                                  |   |
|         | RH093C16-2-46054  | AC240004 | 10 | I2-CC          | 2  | 796   | 957   | E=9.19355e-63  | potato physical map/ BACend tool | 1 |
|         | RH093C16-2-46054  |          | 10 | I2-NBS         | 2  | 958   | 1337  | E=0.0          |                                  |   |
|         | RH093C16-2-46054  |          | 10 | I2-LRR         | 2  | 1342  | 2122  | E=0.0          |                                  |   |
|         | RH093C16-2-46054  |          | 10 | WRR4-exon4     | 2  | 1688  | 1861  | E=0.0410873    |                                  |   |
|         | RH093C16-2-46054  |          | 10 | I2-LRR         | 3  | 4984  | 5121  | E=6.16215e-36  |                                  |   |
|         | RH093C16-2-46054  |          | 10 | I2-LRR         | 1  | 5061  | 5203  | E=5.68697e-25  |                                  |   |
|         | RH180B13-17-7674  | AC234558 | 10 | R3a-LRR        | -3 | 1341  | 1506  | E=8.68677e-60  | BACend tool                      | 1 |
|         | RH180B13-17-7674  |          | 10 | I2-LRR         | -1 | 1477  | 1614  | E=5.81255e-36  |                                  |   |
|         | RH180B13-17-7674  |          | 10 | I2-LRR         | -2 | 1621  | 1755  | E=3.03987e-27  |                                  |   |
|         | RH180B13-24-10438 |          | 10 | I2-CC          | -1 | 1214  | 1375  | E=1.47921e-62  |                                  | 1 |
|         | RH180B13-24-10438 |          | 10 | R3a-NBS        | -1 | 1376  | 1707  | E=1.23406e-179 |                                  |   |
|         | RH180B13-24-10438 |          | 10 | I2-LRR         | -2 | 1688  | 2470  | E=0.0          |                                  |   |
|         | RH180K14-2-37991  | AC237886 | 10 | I2-CC          | 1  | 10172 | 10333 | E=1.47921e-62  | BACend tool                      | 1 |
|         | RH180K14-2-37991  |          | 10 | R3a-NBS        | 1  | 10334 | 10665 | E=1.96849e-180 |                                  |   |
|         | RH180K14-2-37991  |          | 10 | R1-LRR         | 1  | 10585 | 10647 | E=0.00960172   |                                  |   |
|         | RH180K14-2-37991  |          | 10 | I2-LRR         | 2  | 10749 | 11531 | E=0.0          |                                  |   |
| Xla-TNL | RH095B14-3-13929  | AC238172 | 11 | 4 Bs4-TIR      | 1  | 1443  | 1519  | E=3.35341e-09  | potato physical map              | 1 |
|         | RH095B14-3-13929  |          | 11 | 4 Bs4-TIR      | 2  | 1997  | 2146  | E=9.04994e-67  |                                  |   |
|         | RH095B14-3-13929  |          | 11 | 4 N-Nt-NBS     | 2  | 2243  | 2593  | E=5.4519e-108  |                                  |   |
|         | RH095B14-3-13929  |          | 11 | 4 Bs4-NBS      | 3  | 2627  | 2785  | E=2.92918e-08  |                                  |   |
|         | RH095B14-3-13929  |          | 11 | 4 Y-1-LRR      | 3  | 3268  | 3679  | E=2.40068e-114 |                                  |   |
|         | RH095B14-3-13929  |          | 11 | 4 Bs4-CNL      | 3  | 3629  | 3789  | E=1.41897e-36  |                                  |   |
|         | RH095B14-5-17025  |          | 11 | 4 Bs4-TIR      | 2  | 2137  | 2166  | E=8.46175e-11  |                                  | 1 |
|         | RH095B14-5-17025  |          | 11 | 4 Bs4-TIR      | 1  | 2152  | 2290  | E=4.1035e-61   |                                  |   |
|         | RH095B14-5-17025  |          | 11 | 4 N-Nt-NBS     | 1  | 2393  | 2453  | E=1.14687e-17  |                                  |   |
|         | RH095B14-5-17025  |          | 11 | 4 Bs4-NBS      | 2  | 2443  | 2732  | E=5.35736e-84  |                                  |   |
|         | RH095B14-5-17025  |          | 11 | 4 Bs4-LRR      | 3  | 2884  | 2935  | E=5.209e-18    |                                  |   |
|         | RH095B14-5-17025  |          | 11 | 4 N-Nt-LRR     | 2  | 3236  | 3423  | E=4.8401e-61   |                                  |   |
|         | RH095B14-5-17025  |          | 11 | 4 Y-1-LRR      | 1  | 3407  | 3461  | E=1.69819e-13  |                                  |   |
|         | RH095B14-5-17025  |          | 11 | 4 Y-1-LRR      | 3  | 3456  | 3551  | E=1.00618e-34  |                                  |   |
|         | RH095B14-5-17025  |          | 11 | 4 N-Nt-CNL     | 3  | 3497  | 3605  | E=3.00838e-37  |                                  |   |
|         | RH095B14-5-17025  |          | 11 | 4 Bs4-CNL      | 1  | 3628  | 3682  | E=1.37248e-07  |                                  |   |
|         | RH125M10-3-16235  | AC240014 | 11 | 4 Bs4-TIR      | 3  | 3083  | 3238  | E=1.40627e-71  | potato physical map              | 1 |
|         | RH125M10-3-16235  |          | 11 | 4 Y-1-NBS      | 3  | 3286  | 3632  | E=8.9672e-118  |                                  |   |
|         | RH125M10-3-16235  |          | 11 | 4 Y-1-LRR      | 2  | 3964  | 4332  | E=1.49033e-118 |                                  |   |
|         | RH125M10-3-16235  |          | 11 | 4 Bs4-CNL      | 2  | 4285  | 4415  | E=4.03234e-31  |                                  |   |
|         | RH125M10-4-6991   |          | 11 | 4 Y-1-TIR      | -1 | 1388  | 1467  | E=1.7758e-24   |                                  | 1 |
|         | RH125M10-5-90000  |          | 11 | 4 Bs4-TIR      | -2 | 2283  | 2444  | E=6.30698e-75  |                                  | 1 |
|         | RH125M10-5-90000  |          | 11 | 4 Bs4-NBS      | -3 | 2576  | 2944  | E=4.59367e-154 |                                  |   |
|         | RH125M10-5-90000  |          | 11 | 4 Rpp5-LRR     | -3 | 3259  | 3727  | E=5.62503e-21  |                                  |   |
|         | RH125M10-5-90000  |          | 11 | 4 N-Nt-CNL     | -3 | 3882  | 4057  | E=6.31626e-40  |                                  |   |
|         | RH125M10-5-90000  |          | 11 | 4 N-Nt-TIR     | -1 | 4542  | 4692  | E=1.49364e-60  |                                  | 1 |
|         | RH125M10-5-90000  |          | 11 | 4 Rps4-NBS     | -2 | 4828  | 5083  | E=1.87622e-30  |                                  |   |
|         | RH125M10-5-90000  |          | 11 | 4 N-Nt-LRR     | -1 | 5213  | 5300  | E=7.63086e-16  |                                  |   |
|         | RH125M10-5-90000  |          | 11 | 4 Rpp5-LRR     | -2 | 5382  | 5543  | E=2.21133e-18  |                                  |   |
|         | RH125M10-5-90000  |          | 11 | 4 N-Nt-CNL     | -1 | 5672  | 5813  | E=6.31626e-40  |                                  |   |
|         | RH125M10-5-90000  |          | 11 | 4 Bs4-TIR      | -1 | 11388 | 11552 | E=7.90748e-72  |                                  | 1 |
|         | RH125M10-5-90000  |          | 11 | 4 Y-1-NBS      | -3 | 11661 | 12008 | E=5.95624e-119 |                                  |   |
|         | RH125M10-5-90000  |          | 11 | 4 Y-1-LRR      | -3 | 17352 | 17754 | E=1.19899e-120 |                                  |   |
|         | RH125M10-5-90000  |          | 11 | 4 Bs4-CNL      | -3 | 17698 | 17874 | E=3.7031e-37   |                                  |   |
|         | RH125M10-5-90000  |          | 11 | 4 Bs4-TIR      | -3 | 20091 | 20249 | E=6.4094e-77   |                                  | 1 |
|         | RH125M10-5-90000  |          | 11 | 4 Rpg1-b-LRR   | -2 | 24163 | 24236 | E=3.24822e-08  |                                  |   |
|         | RH125M10-5-90000  |          | 11 | 4 Rps4-TIR     | -2 | 25510 | 25658 | E=4.31152e-19  |                                  | 1 |
|         | RH125M10-5-90000  |          | 11 | 4 Bs4-NBS      | -1 | 25737 | 26105 | E=1.22076e-149 |                                  |   |
|         | RH125M10-5-90000  |          | 11 | 4 Y-1-LRR      | -2 | 26360 | 26740 | E=8.83337e-110 |                                  |   |
|         | RH125M10-5-90000  |          | 11 | 4 Bs4-CNL      | -2 | 26688 | 26853 | E=4.02534e-37  |                                  |   |
|         | RH125M10-5-90000  |          | 11 | 4 Rpp2-TIR     | -2 | 27211 | 27355 | E=1.02363e-23  |                                  | 1 |
|         | RH125M10-5-90000  |          | 11 | 4 Bs4-NBS      | -2 | 27421 | 27787 | E=1.1137e-149  |                                  |   |
|         | RH125M10-6-10713  |          | 11 | 4 Bs4-TIR      | 2  | 61    | 221   | E=6.86774e-69  |                                  | 1 |
|         | RH125M10-6-10713  |          | 11 | 4 N-Nt-NBS     | 1  | 304   | 587   | E=3.95241e-95  |                                  |   |
|         | RH125M10-6-10713  |          | 11 | 4 N-Nt-TIR     | 3  | 2728  | 2815  | E=0.0484433    |                                  | 1 |
|         | RH056A20-1-32123  | AC237841 | 11 | 5 Bs4-CNL      | -3 | 3098  | 3172  | E=7.39353e-12  | BACend tool                      | 1 |
|         | RH056A20-1-32123  |          | 11 | 5 Y-1-LRR      | -1 | 4292  | 4492  | E=3.41359e-51  |                                  | 1 |
|         | RH056A20-1-32123  |          | 11 | 5 Rpp2-TIR     | -3 | 5696  | 5843  | E=2.06314e-23  |                                  | 1 |

|                   |          |    |     |            |    |       |       |                |                                 |   |
|-------------------|----------|----|-----|------------|----|-------|-------|----------------|---------------------------------|---|
| RH056A20-1-32123  |          | 11 | 5   | N-Nt-NBS   | -3 | 5960  | 6240  | E=4.05377e-94  |                                 |   |
| RH056A20-1-32123  |          | 11 | 5   | Bs4-LRR    | -3 | 6427  | 6478  | E=1.04988e-17  |                                 |   |
| RH056A20-1-32123  |          | 11 | 5   | Y-1-LRR    | -2 | 6647  | 7015  | E=1.83441e-121 |                                 |   |
| RH056A20-1-32123  |          | 11 | 5   | Bs4-TIR    | -3 | 7778  | 7939  | E=2.2393e-78   |                                 | 1 |
| RH056A20-1-32123  |          | 11 | 5   | Bs4-NBS    | -2 | 7996  | 8333  | E=3.50932e-133 |                                 |   |
| RH056A20-1-32123  |          | 11 | 5   | Bs4-NBS    | -1 | 8459  | 8497  | E=4.33946e-05  |                                 |   |
| RH056A20-1-32123  |          | 11 | 5   | Rpp5-LRR   | -2 | 8663  | 9129  | E=1.65082e-19  |                                 |   |
| RH056A20-1-32123  |          | 11 | 5   | Bs4-CNL    | -2 | 9151  | 9307  | E=2.16719e-43  |                                 |   |
| RH101J08-2-44668  | AC240007 | 11 | 5   | Y-1-LRR    | 3  | 107   | 513   | E=1.59922e-105 | potato physical map             | 1 |
| RH101J08-2-44668  |          | 11 | 5   | N-Nt-CNL   | 3  | 461   | 626   | E=9.65802e-43  |                                 |   |
| RH101J08-2-44668  |          | 11 | 5   | Bs4-NBS    | 3  | 3375  | 3409  | E=0.00022454   |                                 | 1 |
| RH101J08-2-44668  |          | 11 | 5   | N-Nt-CNL   | 2  | 3910  | 4017  | E=5.39218e-10  |                                 |   |
| RH101J08-2-44668  |          | 11 | 5   | Y-1-LRR    | 1  | 5103  | 5396  | E=9.57822e-61  |                                 | 1 |
| RH101J08-2-44668  |          | 11 | 5   | N-Nt-CNL   | 1  | 5344  | 5486  | E=1.00811e-38  |                                 |   |
| RH101J08-2-44668  |          | 11 | 5   | Bs4-TIR    | 2  | 7360  | 7412  | E=1.28423e-10  |                                 | 1 |
| RH101J08-2-44668  |          | 11 | 5   | Bs4-TIR    | 1  | 9904  | 10065 | E=5.53e-68     |                                 |   |
| RH101J08-2-44668  |          | 11 | 5   | Bs4-NBS    | 2  | 10169 | 10520 | E=5.18837e-137 |                                 |   |
| RH101J08-2-44668  |          | 11 | 5   | Gro1-4-NBS | 1  | 10634 | 10739 | E=1.89325e-05  |                                 |   |
| RH101J08-2-44668  |          | 11 | 5   | Bs4-LRR    | 2  | 10886 | 11173 | E=7.9143e-43   |                                 |   |
| RH101J08-2-44668  |          | 11 | 5   | WRR4-exon4 | 2  | 11278 | 11435 | E=6.99018e-11  |                                 |   |
| RH101J08-2-44668  |          | 11 | 5   | WRR4-exon4 | 3  | 11937 | 12135 | E=2.10346e-09  |                                 |   |
| RH101J08-2-44668  |          | 11 | 5   | Rpp4-LRR   | 3  | 11947 | 12418 | E=1.24208e-17  |                                 |   |
| RH101J08-7-49865  |          | 11 | 5   | Bs4-TIR    | 3  | 3404  | 3564  | E=3.50982e-82  |                                 | 1 |
| RH101J08-7-49865  |          | 11 | 5   | Bs4-NBS    | 1  | 3608  | 3653  | E=3.26383e-09  |                                 |   |
| RH101J08-7-49865  |          | 11 | 5   | Y-1-LRR    | 2  | 7129  | 7497  | E=4.75991e-113 |                                 |   |
| RH101J08-7-49865  |          | 11 | 5   | N-Nt-CNL   | 2  | 7444  | 7606  | E=1.41685e-44  |                                 |   |
| RH101J08-7-49865  |          | 11 | 5   | Bs4-TIR    | 2  | 10835 | 10993 | E=5.12548e-71  |                                 | 1 |
| RH101J08-7-49865  |          | 11 | 5   | Bs4-NBS    | 2  | 11051 | 11439 | E=1.72269e-141 |                                 |   |
| RH141E03-1-5702   | AC240024 | 11 | 5   | Bs4-TIR    | -2 | 1069  | 1121  | E=2.56687e-10  | potato physical map             | 1 |
| RH141E03-3-9790   |          | 11 | 5   | Bs4-TIR    | 3  | 2931  | 3088  | E=8.86155e-82  |                                 | 1 |
| RH141E03-4-14300  |          | 11 | 5   | Bs4-NBS    | 2  | 1     | 369   | E=8.4252e-134  |                                 | 1 |
| RH141E03-4-14300  |          | 11 | 5   | N-Nt-LRR   | 1  | 349   | 437   | E=3.39491e-18  |                                 |   |
| RH141E03-6-8445   |          | 11 | 5   | Bs4-NBS    | 2  | 90    | 128   | E=2.85926e-05  |                                 | 1 |
| RH141E03-6-8445   |          | 11 | 5   | Bs4-LRR    | 1  | 150   | 197   | E=2.08405e-12  |                                 |   |
| RH141E03-6-8445   |          | 11 | 5   | Y-1-LRR    | 3  | 330   | 819   | E=5.38237e-92  |                                 |   |
| RH141E03-6-8445   |          | 11 | 5   | WRR4-exon4 | 3  | 614   | 744   | E=7.54624e-06  |                                 |   |
| RH141E03-6-8445   |          | 11 | 5   | Bs4-CNL    | 3  | 761   | 917   | E=3.31667e-43  |                                 |   |
| RH141E03-8-7930   |          | 11 | 5   | Y-1-LRR    | -3 | 666   | 866   | E=1.14456e-50  |                                 | 1 |
| RH141E03-8-7930   |          | 11 | 5   | Bs4-TIR    | -2 | 2083  | 2238  | E=1.13268e-69  |                                 | 1 |
| RH141E03-8-7930   |          | 11 | 5   | Y-1-NBS    | -2 | 2343  | 2501  | E=2.91933e-46  |                                 |   |
| RH204G21-1-4638   |          | 11 | 7   | Y-1-TIR    | 2  | 661   | 816   | E=2.03742e-68  |                                 | 1 |
| RH204G21-1-4638   |          | 11 | 7   | Rpp5-TIR   | 1  | 916   | 969   | E=2.34616e-05  |                                 |   |
| RH204G21-1-4638   |          | 11 | 7   | Y-1-NBS    | 1  | 920   | 1274  | E=1.2109e-117  |                                 |   |
| RH204G21-11-1971  |          | 11 | 7   | Bs4-NBS    | 1  | 1     | 58    | E=4.51777e-10  |                                 | 1 |
| RH204G21-11-1971  |          | 11 | 7   | N-Nt-LRR   | 1  | 251   | 344   | E=4.6268e-15   |                                 |   |
| RH204G21-12-5111  |          | 11 | 7   | Bs4-LRR    | 3  | 157   | 204   | E=5.34413e-16  |                                 | 1 |
| RH204G21-12-5111  |          | 11 | 7   | Y-1-LRR    | 2  | 226   | 586   | E=4.07506e-102 |                                 |   |
| RH204G21-12-5111  |          | 11 | 7   | Bs4-CNL    | 2  | 541   | 723   | E=3.71062e-30  |                                 |   |
| RH204G21-12-5111  |          | 11 | 7   | Bs4-TIR    | 2  | 740   | 893   | E=1.62246e-67  |                                 | 1 |
| RH204G21-12-5111  |          | 11 | 7   | Bs4-NBS    | 2  | 1056  | 1409  | E=4.20177e-145 |                                 |   |
| RH204G21-16-5876  |          | 11 | 7   | Y-1-NBS    | 1  | 1     | 291   | E=5.65391e-126 |                                 | 1 |
| RH204G21-16-5876  |          | 11 | 7   | N-Nt-LRR   | 3  | 515   | 616   | E=1.37911e-17  |                                 |   |
| RH204G21-16-5876  |          | 11 | 7   | Y-1-LRR    | 1  | 965   | 1362  | E=1.09822e-135 |                                 |   |
| RH204G21-16-5876  |          | 11 | 7   | N-Nt-CNL   | 1  | 1309  | 1458  | E=3.17549e-52  |                                 |   |
| RH204G21-16-5876  |          | 11 | 7   | Bs4-TIR    | 1  | 1473  | 1630  | E=1.39337e-74  |                                 | 1 |
| RH204G21-16-5876  |          | 11 | 7   | Bs4-NBS    | 3  | 1711  | 1827  | E=7.14199e-42  |                                 |   |
| RH204G21-19-14518 |          | 11 | 7   | N-Nt-LRR   | 2  | 1074  | 1357  | E=2.51083e-80  |                                 | 1 |
| RH204G21-19-14518 |          | 11 | 7   | WRR4-exon4 | 2  | 1295  | 1484  | E=4.13596e-08  |                                 |   |
| RH204G21-19-14518 |          | 11 | 7   | N-Nt-CNL   | 2  | 2027  | 2176  | E=9.40835e-47  |                                 |   |
| RH204G21-19-14518 |          | 11 | 7   | N-Nt-CNL   | 3  | 2603  | 2637  | E=9.211e-05    |                                 |   |
| RH204G21-19-14518 |          | 11 | 7   | Y-1-TIR    | 3  | 3926  | 4079  | E=1.047e-62    |                                 | 1 |
| RH204G21-19-14518 |          | 11 | 7   | Y-1-NBS    | 2  | 4198  | 4554  | E=8.42855e-159 |                                 |   |
| RH204G21-22-34661 |          | 11 | 7   | N-Nt-LRR   | 2  | 204   | 533   | E=6.67249e-76  |                                 | 1 |
| RH204G21-22-34661 |          | 11 | 7   | N-Nt-CNL   | 2  | 613   | 762   | E=1.02359e-43  |                                 |   |
| RH204G21-22-34661 |          | 11 | 7   | Y-1-TIR    | 1  | 2619  | 2771  | E=5.91083e-78  |                                 | 1 |
| RH204G21-22-34661 |          | 11 | 7   | Y-1-NBS    | 3  | 2774  | 3130  | E=1.21637e-159 |                                 |   |
| RH204G21-22-34661 |          | 11 | 7   | Y-1-NBS    | 1  | 3261  | 3306  | E=3.98121e-12  |                                 |   |
| RH204G21-22-34661 |          | 11 | 7   | Y-1-LRR    | 1  | 3307  | 3353  | E=2.59365e-20  |                                 |   |
| RH204G21-22-34661 |          | 11 | 7   | Y-1-LRR    | 3  | 3804  | 4143  | E=8.07275e-104 |                                 |   |
| RH204G21-22-34661 |          | 11 | 7   | Y-1-CNL    | 1  | 4533  | 4606  | E=4.58276e-26  |                                 |   |
| RH204G21-9-12394  |          | 11 | 7   | Rpp1-LRR   | 1  | 2079  | 2374  | E=0.0498453    |                                 | 1 |
| RH008P12-2-58879  | AC237927 | 11 | 2-8 | N-Nt-LRR   | -1 | 1227  | 1359  | E=2.0489e-33   | RGH-SSR4                        | 1 |
| RH008P12-2-58879  |          | 11 | 2-8 | Rps4-LRR   | -2 | 1486  | 1666  | E=6.01161e-10  |                                 |   |
| RH008P12-2-58879  |          | 11 | 2-8 | Mla1-LRR   | -3 | 1706  | 1769  | E=0.000108945  |                                 |   |
| RH008P12-2-58879  |          | 11 | 2-8 | N-Nt-CNL   | -3 | 1808  | 1967  | E=9.05274e-36  |                                 |   |
| RH008P12-2-58879  |          | 11 | 2-8 | Bs4-TIR    | -2 | 2896  | 3051  | E=7.33755e-71  |                                 | 1 |
| RH008P12-2-58879  |          | 11 | 2-8 | Y-1-NBS    | -2 | 3101  | 3447  | E=9.98878e-120 |                                 |   |
| RH008P12-2-58879  |          | 11 | 2-8 | N-Nt-LRR   | -2 | 3885  | 4095  | E=8.31549e-65  |                                 |   |
| RH008P12-2-58879  |          | 11 | 2-8 | Bs4-CNL    | -2 | 6326  | 6418  | E=1.13868e-18  |                                 |   |
| RH008P12-2-58879  |          | 11 | 2-8 | Bs4-TIR    | -3 | 8951  | 9109  | E=7.58877e-70  |                                 | 1 |
| RH008P12-2-58879  |          | 11 | 2-8 | Gro1-4-NBS | -1 | 11705 | 11785 | E=1.37763e-08  |                                 |   |
| RH008P12-2-58879  |          | 11 | 2-8 | Rpp4-LRR   | -3 | 11964 | 12089 | E=2.26952e-10  |                                 |   |
| RH008P12-2-58879  |          | 11 | 2-8 | Rps4-NBS   | -2 | 12008 | 12270 | E=1.84303e-34  |                                 | 1 |
| RH008P12-2-58879  |          | 11 | 2-8 | Y-1-LRR    | -1 | 12397 | 12543 | E=6.1608e-29   |                                 |   |
| RH008P12-2-58879  |          | 11 | 2-8 | WRR4-exon4 | -1 | 12424 | 12488 | E=0.0384343    |                                 |   |
| RH008P12-2-58879  |          | 11 | 2-8 | Gro1-4-NBS | -3 | 12432 | 12513 | E=1.93955e-08  |                                 | 1 |
| RH008P12-2-58879  |          | 11 | 2-8 | Y-1-TIR    | -2 | 14559 | 14717 | E=2.08906e-68  |                                 | 1 |
| RH008P12-2-58879  |          | 11 | 2-8 | Y-1-NBS    | -1 | 14964 | 15034 | E=1.73988e-18  |                                 |   |
| RH008P12-2-58879  |          | 11 | 2-8 | N-Nt-LRR   | -3 | 15727 | 16066 | E=1.29102e-72  |                                 |   |
| RH008P12-2-58879  |          | 11 | 2-8 | Bs4-CNL    | -3 | 16197 | 16379 | E=1.88441e-36  |                                 |   |
| RH008P12-3-55073  |          | 11 | 2-8 | Y-1-TIR    | -2 | 5993  | 6148  | E=8.55008e-71  |                                 | 1 |
| RH008P12-3-55073  |          | 11 | 2-8 | Bs4-NBS    | -3 | 6224  | 6598  | E=9.20358e-117 |                                 |   |
| RH008P12-3-55073  |          | 11 | 2-8 | Bs4-LRR    | -3 | 6943  | 6996  | E=3.86083e-15  |                                 |   |
| RH008P12-3-55073  |          | 11 | 2-8 | N-Nt-LRR   | -2 | 7053  | 7376  | E=4.04103e-79  |                                 |   |
| RH008P12-3-55073  |          | 11 | 2-8 | N-Nt-CNL   | -2 | 7587  | 7762  | E=3.57828e-43  |                                 |   |
| RH155M20-1-32352  | AC238292 | 11 | 2-8 | N-Nt-LRR   | 2  | 1453  | 1585  | E=2.0489e-33   | potato physical map/BACend tool | 1 |
| RH155M20-1-32352  |          | 11 | 2-8 | N-Nt-LRR   | 1  | 1555  | 1696  | E=2.60904e-34  |                                 |   |
| RH155M20-1-32352  |          | 11 | 2-8 | Rps4-LRR   | 3  | 1720  | 1900  | E=6.81311e-10  |                                 |   |

|                  |          |    |     |            |    |       |       |                |                                 |   |
|------------------|----------|----|-----|------------|----|-------|-------|----------------|---------------------------------|---|
| RH155M20-1-32352 |          | 11 | 2-8 | Gro1-4-LRR | 1  | 1935  | 2087  | E=6.17574e-16  |                                 |   |
| RH155M20-1-32352 |          | 11 | 2-8 | Bs4-CNL    | 1  | 2043  | 2208  | E=5.08764e-35  |                                 |   |
| RH155M20-1-32352 |          | 11 | 2-8 | Bs4-TIR    | 3  | 3130  | 3285  | E=5.12548e-71  |                                 |   |
| RH155M20-1-32352 |          | 11 | 2-8 | Y-1-NBS    | 3  | 3335  | 3681  | E=4.05657e-120 |                                 | 1 |
| RH155M20-1-32352 |          | 11 | 2-8 | N-Nt-LRR   | 3  | 4119  | 4329  | E=1.51632e-64  |                                 |   |
| RH155M20-1-32352 |          | 11 | 2-8 | Bs4-CNL    | 3  | 6560  | 6652  | E=1.20716e-18  |                                 |   |
| RH155M20-1-32352 |          | 11 | 2-8 | Bs4-TIR    | 1  | 9186  | 9344  | E=7.71647e-70  |                                 | 1 |
| RH155M20-1-32352 |          | 11 | 2-8 | Prf-NBS    | 3  | 9414  | 9523  | E=0.000152388  |                                 |   |
| RH155M20-2-11024 |          | 11 | 2-8 | Bs4-TIR    | 2  | 385   | 545   | E=1.44234e-70  |                                 | 1 |
| RH155M20-2-11024 |          | 11 | 2-8 | Rpp5-TIR   | 3  | 636   | 690   | E=7.35863e-05  |                                 |   |
| RH155M20-2-11024 |          | 11 | 2-8 | Bs4-NBS    | 3  | 640   | 1014  | E=3.4109e-116  |                                 |   |
| RH155M20-2-11024 |          | 11 | 2-8 | Bs4-LRR    | 3  | 1359  | 1412  | E=3.86083e-15  |                                 |   |
| RH155M20-2-11024 |          | 11 | 2-8 | N-Nt-LRR   | 2  | 1450  | 1773  | E=4.65686e-79  |                                 |   |
| RH155M20-2-11024 |          | 11 | 2-8 | N-Nt-CNL   | 2  | 1984  | 2159  | E=7.90534e-43  |                                 |   |
| RH155M20-4-42573 |          | 11 | 2-8 | Gro1-4-NBS | 2  | 1196  | 1276  | E=1.37763e-08  |                                 | 1 |
| RH155M20-4-42573 |          | 11 | 2-8 | Rpp4-LRR   | 1  | 1310  | 1435  | E=1.98589e-10  |                                 |   |
| RH155M20-4-42573 |          | 11 | 2-8 | Bs4-NBS    | 3  | 1427  | 1710  | E=1.95759e-103 |                                 | 1 |
| RH155M20-4-42573 |          | 11 | 2-8 | Gro1-4-NBS | 1  | 1778  | 1859  | E=1.9558e-08   |                                 |   |
| RH155M20-4-42573 |          | 11 | 2-8 | N-Nt-LRR   | 2  | 1888  | 2034  | E=2.67595e-33  |                                 |   |
| RH155M20-4-42573 |          | 11 | 2-8 | Bs4-TIR    | 3  | 3997  | 4161  | E=3.3232e-69   |                                 | 1 |
| RH155M20-4-42573 |          | 11 | 2-8 | Rpp4-NBS   | 3  | 4227  | 4509  | E=1.52748e-38  |                                 |   |
| RH155M20-4-42573 |          | 11 | 2-8 | Bs4-LRR    | 3  | 4948  | 5001  | E=3.58049e-16  |                                 |   |
| RH155M20-4-42573 |          | 11 | 2-8 | N-Nt-LRR   | 1  | 5073  | 5412  | E=1.42698e-72  |                                 |   |
| RH155M20-4-42573 |          | 11 | 2-8 | Bs4-CNL    | 1  | 5543  | 5725  | E=1.60815e-36  |                                 |   |
| RH003B10-1-39626 | AC237906 | 11 | 4-5 | Bs4-TIR    | 3  | 3202  | 3347  | E=4.38295e-64  | potato physical map/BACend tool | 1 |
| RH003B10-1-39626 |          | 11 | 4-5 | Y-1-NBS    | 3  | 3447  | 3794  | E=2.52781e-111 |                                 |   |
| RH003B10-1-39626 |          | 11 | 4-5 | Bs4-LRR    | 3  | 4043  | 4107  | E=2.78681e-17  |                                 |   |
| RH003B10-1-39626 |          | 11 | 4-5 | Y-1-LRR    | 1  | 4120  | 4559  | E=2.19587e-105 |                                 |   |
| RH003B10-1-39626 |          | 11 | 4-5 | Y-1-LRR    | 2  | 5501  | 5624  | E=1.18074e-29  |                                 |   |
| RH003B10-1-39626 |          | 11 | 4-5 | Y-1-CNL    | 1  | 5723  | 5789  | E=4.88381e-08  |                                 |   |
| RH003B10-3-42329 |          | 11 | 4-5 | N-Nt-LRR   | 2  | 562   | 853   | E=1.61068e-86  |                                 | 1 |
| RH003B10-3-42329 |          | 11 | 4-5 | Y-1-CNL    | 2  | 1026  | 1116  | E=2.16522e-22  |                                 |   |
| RH003B10-3-42329 |          | 11 | 4-5 | Bs4-TIR    | 1  | 1746  | 1906  | E=3.70072e-72  |                                 | 1 |
| RH003B10-3-42329 |          | 11 | 4-5 | N-Nt-NBS   | 1  | 1961  | 2309  | E=3.08841e-140 |                                 |   |
| RH003B10-3-42329 |          | 11 | 4-5 | Gro1-4-NBS | 3  | 2367  | 2457  | E=8.14645e-08  |                                 |   |
| RH003B10-3-42329 |          | 11 | 4-5 | Y-1-LRR    | 1  | 2607  | 2969  | E=4.41556e-113 |                                 |   |
| RH003B10-3-42329 |          | 11 | 4-5 | N-Nt-CNL   | 1  | 2920  | 3055  | E=1.50512e-37  |                                 |   |
| RH003B10-3-42329 |          | 11 | 4-5 | Bs4-TIR    | 3  | 3931  | 4092  | E=1.15769e-80  |                                 | 1 |
| RH003B10-3-42329 |          | 11 | 4-5 | Bs4-NBS    | 1  | 4251  | 4606  | E=7.72383e-146 |                                 |   |
| RH003B10-3-42329 |          | 11 | 4-5 | Y-1-LRR    | 3  | 4830  | 5146  | E=5.2151e-57   |                                 |   |
| RH003B10-3-42329 |          | 11 | 4-5 | Bs4-CNL    | 3  | 5089  | 5220  | E=2.32217e-35  |                                 |   |
| RH003B10-3-42329 |          | 11 | 4-5 | N-Nt-CNL   | 3  | 8112  | 8242  | E=1.17012e-42  |                                 |   |
| RH003B10-3-42329 |          | 11 | 4-5 | Bs4-TIR    | 2  | 9133  | 9290  | E=1.64451e-78  |                                 | 1 |
| RH003B10-3-42329 |          | 11 | 4-5 | Bs4-NBS    | 3  | 9329  | 9435  | E=1.30573e-32  |                                 |   |
| RH003B10-3-42329 |          | 11 | 4-5 | Bs4-NBS    | 2  | 9434  | 9682  | E=2.37036e-105 |                                 |   |
| RH003B10-3-42329 |          | 11 | 4-5 | Bs4-LRR    | 2  | 11707 | 12001 | E=1.36081e-72  |                                 |   |
| RH003B10-3-42329 |          | 11 | 4-5 | N-Nt-CNL   | 2  | 12367 | 12503 | E=1.05864e-42  |                                 |   |
| RH025E12-1-42151 | AC237966 | 11 | 4-5 | Bs4-TIR    | 3  | 951   | 1111  | E=2.07851e-76  | potato physical map             | 1 |
| RH025E12-1-42151 |          | 11 | 4-5 | N-Nt-NBS   | 1  | 1225  | 1398  | E=2.85806e-62  |                                 |   |
| RH025E12-1-42151 |          | 11 | 4-5 | Y-1-NBS    | 2  | 1365  | 1608  | E=1.09942e-76  |                                 |   |
| RH025E12-1-42151 |          | 11 | 4-5 | Y-1-LRR    | 1  | 1658  | 1700  | E=6.4606e-09   |                                 |   |
| RH025E12-1-42151 |          | 11 | 4-5 | N-Nt-LRR   | 3  | 1682  | 1780  | E=5.94623e-13  |                                 |   |
| RH025E12-5-33671 |          | 11 | 4-5 | Bs4-CNL    | -1 | 797   | 881   | E=1.72966e-15  |                                 | 1 |
| RH025E12-5-33671 |          | 11 | 4-5 | Bs4-TIR    | -2 | 4168  | 4313  | E=2.56953e-64  |                                 |   |
| RH025E12-5-33671 |          | 11 | 4-5 | N-Nt-NBS   | -2 | 4413  | 4762  | E=1.62458e-111 |                                 |   |
| RH025E12-5-33671 |          | 11 | 4-5 | Bs4-LRR    | -2 | 5009  | 5073  | E=2.65073e-17  |                                 |   |
| RH025E12-5-33671 |          | 11 | 4-5 | Y-1-LRR    | -3 | 5078  | 5517  | E=2.19587e-105 |                                 |   |
| RH025E12-5-33671 |          | 11 | 4-5 | N-Nt-CNL   | -3 | 5471  | 5619  | E=1.1658e-26   |                                 |   |
| RH025E12-5-33671 |          | 11 | 4-5 | Y-1-LRR    | -1 | 6463  | 6586  | E=1.5421e-29   |                                 | 1 |
| RH025E12-5-33671 |          | 11 | 4-5 | Y-1-CNL    | -3 | 6681  | 6747  | E=4.80298e-08  |                                 |   |
| RH025E12-6-5856  |          | 11 | 4-5 | Bs4-TIR    | 1  | 574   | 729   | E=3.80003e-67  |                                 | 1 |
| RH025E12-6-5856  |          | 11 | 4-5 | Bs4-NBS    | 2  | 1135  | 1166  | E=0.000867609  |                                 |   |
| RH025E12-6-5856  |          | 11 | 4-5 | Bs4-LRR    | 2  | 1178  | 1213  | E=5.67871e-08  |                                 |   |
| RH025E12-6-5856  |          | 11 | 4-5 | N-Nt-LRR   | 3  | 1546  | 1575  | E=0.00173461   |                                 |   |
| RH025E12-6-5856  |          | 11 | 4-5 | N-Nt-CNL   | 2  | 1593  | 1740  | E=9.19441e-40  |                                 |   |
| RH057B24-1-3338  | AC238063 | 11 | 4-5 | Bs4-TIR    | -2 | 454   | 606   | E=1.29633e-64  | RGH-SSR15                       | 1 |
| RH057B24-1-3338  |          | 11 | 4-5 | Bs4-NBS    | -3 | 644   | 755   | E=9.10506e-39  |                                 |   |
| RH057B24-2-22702 |          | 11 | 4-5 | Y-1-LRR    | -3 | 225   | 684   | E=6.92574e-57  |                                 | 1 |
| RH057B24-2-22702 |          | 11 | 4-5 | N-Nt-CNL   | -3 | 631   | 777   | E=1.91548e-40  |                                 |   |
| RH057B24-4-17578 |          | 11 | 4-5 | Bs4-TIR    | 1  | 1451  | 1567  | E=2.80123e-54  |                                 | 1 |
| RH057B24-4-17578 |          | 11 | 4-5 | Bs4-NBS    | 3  | 1543  | 1608  | E=3.94402e-18  |                                 |   |
| RH057B24-4-17578 |          | 11 | 4-5 | Bs4-TIR    | 3  | 2302  | 2461  | E=8.45577e-71  |                                 | 1 |
| RH057B24-4-17578 |          | 11 | 4-5 | N-Nt-NBS   | 1  | 2568  | 2916  | E=8.69849e-137 |                                 |   |
| RH057B24-4-17578 |          | 11 | 4-5 | Gro1-4-NBS | 2  | 2911  | 2991  | E=1.82952e-08  |                                 |   |
| RH057B24-4-17578 |          | 11 | 4-5 | N-Nt-LRR   | 1  | 3059  | 3180  | E=1.76266e-34  |                                 |   |
| RH057B24-4-17578 |          | 11 | 4-5 | Y-1-CNL    | 1  | 3181  | 3231  | E=2.21125e-07  |                                 |   |
| RH057B24-5-4411  |          | 11 | 4-5 | Y-1-LRR    | -3 | 146   | 462   | E=1.70537e-56  |                                 | 1 |
| RH057B24-5-4411  |          | 11 | 4-5 | Bs4-CNL    | -3 | 405   | 536   | E=2.74389e-35  |                                 |   |
| RH057B24-6-15125 |          | 11 | 4-5 | N-Nt-CNL   | 1  | 1964  | 2094  | E=2.02952e-42  |                                 |   |
| RH057B24-6-15125 |          | 11 | 4-5 | Bs4-TIR    | 3  | 2976  | 3133  | E=1.24906e-77  |                                 | 1 |
| RH057B24-6-15125 |          | 11 | 4-5 | Bs4-NBS    | 1  | 3181  | 3287  | E=8.82153e-33  |                                 |   |
| RH057B24-6-15125 |          | 11 | 4-5 | Bs4-NBS    | 3  | 3277  | 3525  | E=6.50352e-106 |                                 |   |
| RH057B24-6-15125 |          | 11 | 4-5 | Bs4-LRR    | 1  | 4560  | 4613  | E=5.90692e-16  |                                 |   |
| RH057B24-8-5173  |          | 11 | 4-5 | N-Nt-LRR   | -3 | 422   | 733   | E=1.5489e-77   |                                 | 1 |
| RH057B24-8-5173  |          | 11 | 4-5 | N-Nt-CNL   | -3 | 1102  | 1238  | E=6.00261e-43  |                                 |   |
| RH057B24-9-30201 |          | 11 | 4-5 | N-Nt-LRR   | -1 | 1218  | 1389  | E=1.94547e-39  |                                 | 1 |
| RH057B24-9-30201 |          | 11 | 4-5 | Rp1D-LRR   | -2 | 1416  | 1474  | E=0.0010765    |                                 |   |
| RH057B24-9-30201 |          | 11 | 4-5 | Bs4-CNL    | -2 | 1502  | 1680  | E=4.41995e-31  |                                 |   |
| RH057B24-9-30201 |          | 11 | 4-5 | Bs4-CNL    | -3 | 4568  | 4640  | E=2.29635e-16  |                                 |   |
| RH057B24-9-30201 |          | 11 | 4-5 | Y-1-TIR    | -3 | 6975  | 7027  | E=1.69645e-09  |                                 | 1 |
| RH057B24-9-30201 |          | 11 | 4-5 | Bs4-TIR    | -2 | 7398  | 7556  | E=5.08142e-72  |                                 |   |
| RH057B24-9-30201 |          | 11 | 4-5 | Rpp5-TIR   | -3 | 7596  | 7652  | E=7.48246e-05  |                                 |   |
| RH057B24-9-30201 |          | 11 | 4-5 | Bs4-NBS    | -3 | 7601  | 7952  | E=3.83108e-147 |                                 |   |
| RH057B24-9-30201 |          | 11 | 4-5 | N-Nt-LRR   | -3 | 8054  | 8141  | E=7.01796e-17  |                                 |   |
| RH057B24-9-30201 |          | 11 | 4-5 | Bs4-LRR    | -2 | 9016  | 9285  | E=2.97621e-78  |                                 |   |
| RH080J12-1-5613  | AC238128 | 11 | 4-5 | Bs4-TIR    | 1  | 811   | 971   | E=4.99008e-77  | potato physical map/BACend tool | 1 |
| RH080J12-1-5613  |          | 11 | 4-5 | N-Nt-NBS   | 1  | 1075  | 1424  | E=7.45777e-121 |                                 |   |
| RH080J12-1-5613  |          | 11 | 4-5 | Bs4-LRR    | 1  | 1689  | 1742  | E=1.40635e-16  |                                 |   |

|                   |          |    |     |              |    |       |       |                |                     |   |
|-------------------|----------|----|-----|--------------|----|-------|-------|----------------|---------------------|---|
| RH080J12-2-5982   |          | 11 | 4-5 | Bs4-TIR      | 2  | 923   | 1083  | E=8.09851e-76  |                     | 1 |
| RH080J12-2-5982   |          | 11 | 4-5 | N-Nt-NBS     | 3  | 1196  | 1369  | E=2.85806e-62  |                     |   |
| RH080J12-2-5982   |          | 11 | 4-5 | Y-1-NBS      | 1  | 1340  | 1583  | E=1.7252e-76   |                     |   |
| RH080J12-2-5982   |          | 11 | 4-5 | Y-1-LRR      | 3  | 1629  | 1671  | E=5.46764e-09  |                     |   |
| RH080J12-2-5982   |          | 11 | 4-5 | N-Nt-LRR     | 2  | 1654  | 1752  | E=6.40995e-13  |                     |   |
| RH080J12-3-2538   |          | 11 | 4-5 | N-Nt-LRR     | 2  | 439   | 700   | E=4.55361e-70  |                     | 1 |
| RH080J12-5-46046  |          | 11 | 4-5 | Rcy1-DomainE | 2  | 3251  | 3372  | E=0.00156424   |                     | 1 |
| RH080J12-5-46046  |          | 11 | 4-5 | Bs4-NBS      | 3  | 3658  | 3695  | E=1.22079e-05  |                     |   |
| RH080J12-5-46046  |          | 11 | 4-5 | Gro1-4-NBS   | 3  | 3734  | 3786  | E=3.36697e-05  |                     |   |
| RH080J12-5-46046  |          | 11 | 4-5 | N-Nt-LRR     | 1  | 4053  | 4314  | E=1.99003e-76  |                     |   |
| RH080J12-5-46046  |          | 11 | 4-5 | Y-1-LRR      | 2  | 4877  | 5040  | E=3.90905e-44  |                     |   |
| RH080J12-5-46046  |          | 11 | 4-5 | N-Nt-CNL     | 2  | 4986  | 5124  | E=2.3967e-44   |                     |   |
| RH080J12-5-46046  |          | 11 | 4-5 | Bs4-TIR      | 2  | 6901  | 7057  | E=1.88539e-67  |                     | 1 |
| RH080J12-5-46046  |          | 11 | 4-5 | Bs4-NBS      | 2  | 7116  | 7483  | E=2.36472e-142 |                     |   |
| RH080J12-5-46046  |          | 11 | 4-5 | Rpp1-NBS     | 3  | 7618  | 7653  | E=0.433539     |                     |   |
| RH080J12-5-46046  |          | 11 | 4-5 | Y-1-LRR      | 3  | 7766  | 8157  | E=8.95341e-121 |                     |   |
| RH080J12-5-46046  |          | 11 | 4-5 | N-Nt-CNL     | 3  | 8105  | 8242  | E=2.90964e-37  |                     |   |
| RH080J12-8-6852   |          | 11 | 4-5 | Y-1-LRR      | 2  | 23    | 176   | E=7.74612e-45  |                     | 1 |
| RH080J12-8-6852   |          | 11 | 4-5 | N-Nt-CNL     | 2  | 125   | 278   | E=6.74639e-43  |                     | 1 |
| RH080J12-9-29683  |          | 11 | 4-5 | Bs4-TIR      | -2 | 5324  | 5485  | E=2.12749e-82  |                     | 1 |
| RH080J12-9-29683  |          | 11 | 4-5 | Bs4-NBS      | -1 | 5514  | 5869  | E=1.1598e-153  |                     |   |
| RH080J12-9-29683  |          | 11 | 4-5 | N-Nt-LRR     | -3 | 6092  | 6220  | E=2.65294e-34  |                     |   |
| RH080J12-9-29683  |          | 11 | 4-5 | N-Nt-LRR     | -2 | 7743  | 7785  | E=3.03027e-07  |                     |   |
| RH080J12-9-29683  |          | 11 | 4-5 | Y-1-LRR      | -1 | 7849  | 8056  | E=6.40466e-39  |                     |   |
| RH080J12-9-29683  |          | 11 | 4-5 | Bs4-CNL      | -2 | 8021  | 8161  | E=2.17096e-37  |                     |   |
| RH102C09-18-2078  | AC238197 | 11 | 4-5 | N-Nt-LRR     | -3 | 1     | 79    | E=1.45286e-10  | potato physical map | 1 |
| RH102C09-2-4835   |          | 11 | 4-5 | N-Nt-LRR     | 1  | 64    | 274   | E=1.9798e-65   |                     | 1 |
| RH102C09-2-4835   |          | 11 | 4-5 | Y-1-LRR      | 2  | 242   | 398   | E=2.03432e-52  |                     |   |
| RH102C09-4-3342   |          | 11 | 4-5 | Bs4-CNL      | 3  | 840   | 932   | E=1.39113e-18  |                     | 1 |
| RH102C09-6-2228   |          | 11 | 4-5 | Bs4-NBS      | 3  | 1     | 184   | E=1.04653e-47  |                     | 1 |
| RH102C09-6-2228   |          | 11 | 4-5 | Bs4-LRR      | 3  | 529   | 582   | E=4.48649e-15  |                     |   |
| RH069F21-5-32132  | AC237847 | 11 | 5-6 | N-Nt-LRR     | 3  | 1197  | 1329  | E=2.0489e-33   | BACend tool         | 1 |
| RH069F21-5-32132  |          | 11 | 5-6 | N-Nt-LRR     | 2  | 1291  | 1432  | E=2.60904e-34  |                     |   |
| RH069F21-5-32132  |          | 11 | 5-6 | Rps4-LRR     | 1  | 1456  | 1636  | E=6.48043e-10  |                     |   |
| RH069F21-5-32132  |          | 11 | 5-6 | Gro1-4-LRR   | 2  | 1671  | 1823  | E=6.12442e-16  |                     |   |
| RH069F21-5-32132  |          | 11 | 5-6 | Bs4-CNL      | 2  | 1779  | 1944  | E=5.57668e-35  |                     |   |
| RH069F21-5-32132  |          | 11 | 5-6 | Bs4-TIR      | 1  | 2866  | 3021  | E=7.39903e-71  |                     | 1 |
| RH069F21-5-32132  |          | 11 | 5-6 | Y-1-NBS      | 1  | 3071  | 3417  | E=6.97743e-120 |                     |   |
| RH069F21-5-32132  |          | 11 | 5-6 | N-Nt-LRR     | 1  | 3855  | 4065  | E=1.1323e-64   |                     |   |
| RH069F21-5-32132  |          | 11 | 5-6 | Bs4-CNL      | 1  | 6296  | 6388  | E=1.14822e-18  |                     |   |
| RH069F21-5-32132  |          | 11 | 5-6 | Bs4-TIR      | 2  | 8922  | 9080  | E=1.27303e-69  |                     | 1 |
| RH069F21-5-32132  |          | 11 | 5-6 | Prf-NBS      | 1  | 9150  | 9259  | E=0.000152388  |                     |   |
| RH069F21-7-56856  |          | 11 | 5-6 | Gro1-4-NBS   | 3  | 858   | 938   | E=1.33241e-08  |                     | 1 |
| RH069F21-7-56856  |          | 11 | 5-6 | Bs4-NBS      | 1  | 1088  | 1371  | E=5.59983e-104 |                     |   |
| RH069F21-7-56856  |          | 11 | 5-6 | N-Nt-LRR     | 3  | 1550  | 1696  | E=1.93266e-33  |                     |   |
| RH069F21-7-56856  |          | 11 | 5-6 | N-Nt-TIR     | 1  | 3662  | 3809  | E=3.41379e-58  |                     | 1 |
| RH069F21-7-56856  |          | 11 | 5-6 | Rpp4-NBS     | 1  | 3888  | 4170  | E=1.52748e-38  |                     |   |
| RH069F21-7-56856  |          | 11 | 5-6 | N-Nt-LRR     | 2  | 4730  | 5069  | E=3.85151e-72  |                     |   |
| RH069F21-7-56856  |          | 11 | 5-6 | Bs4-CNL      | 2  | 5200  | 5382  | E=1.96469e-36  |                     |   |
| RH069F21-7-56856  |          | 11 | 5-6 | Bs4-TIR      | 1  | 13437 | 13597 | E=1.05043e-70  |                     | 1 |
| RH069F21-7-56856  |          | 11 | 5-6 | Bs4-NBS      | 2  | 13689 | 14063 | E=7.8543e-117  |                     |   |
| RH069F21-7-56856  |          | 11 | 5-6 | N-Nt-LRR     | 1  | 14502 | 14825 | E=8.41873e-80  |                     |   |
| RH069F21-7-56856  |          | 11 | 5-6 | N-Nt-CNL     | 1  | 15036 | 15211 | E=2.95346e-43  |                     |   |
| RH069F21-8-15695  |          | 11 | 5-6 | N-Nt-CNL     | 1  | 733   | 842   | E=9.11331e-13  |                     | 1 |
| RH069F21-8-15695  |          | 11 | 5-6 | Bs4-TIR      | 2  | 1991  | 2150  | E=3.70394e-69  |                     | 1 |
| RH069F21-8-15695  |          | 11 | 5-6 | Bs4-NBS      | 1  | 2180  | 2404  | E=3.3469e-95   |                     |   |
| RH095A10-10-17615 | AC237855 | 11 | 5-6 | Bs4-TIR      | -2 | 2728  | 2889  | E=2.78019e-80  | BACend tool         | 1 |
| RH095A10-10-17615 |          | 11 | 5-6 | Bs4-NBS      | -3 | 2980  | 3377  | E=5.51925e-154 |                     |   |
| RH095A10-10-17615 |          | 11 | 5-6 | N-Nt-LRR     | -3 | 4192  | 4473  | E=1.69288e-87  |                     |   |
| RH095A10-10-17615 |          | 11 | 5-6 | Bs4-CNL      | -3 | 4606  | 4761  | E=2.02666e-44  |                     |   |
| RH095A10-2-42637  |          | 11 | 5-6 | Y-1-TIR      | 1  | 180   | 204   | E=2.10989e-05  |                     | 1 |
| RH095A10-2-42637  |          | 11 | 5-6 | Bs4-NBS      | 2  | 1201  | 1485  | E=8.45456e-122 |                     |   |
| RH095A10-2-42637  |          | 11 | 5-6 | Bs4-NBS      | 1  | 1471  | 1561  | E=5.09641e-26  |                     |   |
| RH095A10-2-42637  |          | 11 | 5-6 | Y-1-NBS      | 3  | 2161  | 2204  | E=3.40445e-05  |                     |   |
| RH095A10-2-42637  |          | 11 | 5-6 | N-Nt-LRR     | 1  | 2644  | 2928  | E=4.27938e-54  |                     |   |
| RH095A10-2-42637  |          | 11 | 5-6 | Rps4-LRR     | 1  | 3123  | 3230  | E=4.06497e-07  |                     |   |
| RH095A10-2-42637  |          | 11 | 5-6 | N-Nt-CNL     | 1  | 3258  | 3278  | E=0.00813213   |                     |   |
| RH095A10-2-42637  |          | 11 | 5-6 | Bs4-TIR      | 2  | 3673  | 3829  | E=5.9578e-70   |                     | 1 |
| RH095A10-2-42637  |          | 11 | 5-6 | Y-1-NBS      | 2  | 3878  | 4224  | E=8.23264e-125 |                     |   |
| RH095A10-2-42637  |          | 11 | 5-6 | Gro1-4-NBS   | 1  | 4386  | 4474  | E=8.71131e-07  |                     |   |
| RH095A10-2-42637  |          | 11 | 5-6 | Y-1-LRR      | 2  | 4660  | 5038  | E=6.62844e-122 |                     |   |
| RH095A10-2-42637  |          | 11 | 5-6 | Bs4-CNL      | 2  | 4981  | 5110  | E=2.52424e-35  |                     |   |
| RH095A10-2-42637  |          | 11 | 5-6 | Y-1-TIR      | 3  | 7919  | 8069  | E=7.49893e-63  |                     | 1 |
| RH095A10-2-42637  |          | 11 | 5-6 | Pib-NBS      | 2  | 8265  | 8537  | E=4.15899e-16  |                     |   |
| RH095A10-2-42637  |          | 11 | 5-6 | Y-1-LRR      | 3  | 9415  | 9829  | E=3.56683e-101 |                     |   |
| RH095A10-2-42637  |          | 11 | 5-6 | N-Nt-CNL     | 3  | 9792  | 9965  | E=1.96974e-30  |                     |   |
| RH095A10-2-42637  |          | 11 | 5-6 | Rpp5-LRR     | 1  | 10872 | 10963 | E=3.53557e-11  |                     | 1 |
| RH095A10-2-42637  |          | 11 | 5-6 | Prf-LRR      | 3  | 11274 | 11370 | E=0.0089675    |                     |   |
| RH095A10-7-8114   |          | 11 | 5-6 | Bs4-TIR      | -3 | 1191  | 1266  | E=1.90461e-32  |                     | 1 |
| RH095A10-7-8114   |          | 11 | 5-6 | Y-1-LRR      | -2 | 1270  | 1317  | E=2.28986e-18  |                     |   |
| RH095A10-7-8114   |          | 11 | 5-6 | N-Nt-CNL     | -3 | 1328  | 1433  | E=4.03334e-33  |                     |   |
| RH095A10-8-8624   |          | 11 | 5-6 | Bs4-TIR      | 3  | 761   | 923   | E=1.916e-69    |                     | 1 |
| RH095A10-8-8624   |          | 11 | 5-6 | Bs4-NBS      | 1  | 966   | 1333  | E=2.6508e-151  |                     |   |
| RH095A10-8-8624   |          | 11 | 5-6 | Bs4-LRR      | 1  | 1582  | 1633  | E=1.28265e-17  |                     |   |
| RH095A10-8-8624   |          | 11 | 5-6 | Y-1-LRR      | 3  | 1633  | 2026  | E=2.02419e-98  |                     |   |
| RH095A10-8-8624   |          | 11 | 5-6 | N-Nt-CNL     | 3  | 1976  | 2121  | E=1.43162e-37  |                     |   |
| RH144F23-7-23529  | AC240028 | 11 | 5-6 | Rpp4-TIR     | 2  | 742   | 891   | E=3.6291e-32   | RGH-CAPS10 (SH)     | 1 |
| RH144F23-7-23529  |          | 11 | 5-6 | N-Nt-NBS     | 1  | 940   | 1059  | E=2.05834e-43  |                     |   |
| RH144F23-7-23529  |          | 11 | 5-6 | N-Nt-NBS     | 2  | 1065  | 1291  | E=9.4265e-90   |                     |   |
| RH144F23-7-23529  |          | 11 | 5-6 | Bs4-LRR      | 2  | 1699  | 1747  | E=1.86712e-17  |                     |   |
| RH144F23-7-23529  |          | 11 | 5-6 | Y-1-LRR      | 1  | 3134  | 3580  | E=9.82607e-88  |                     |   |
| RH144F23-7-23529  |          | 11 | 5-6 | N-Nt-CNL     | 1  | 3526  | 3664  | E=8.44858e-44  |                     |   |
| RH144F23-7-23529  |          | 11 | 5-6 | Bs4-CNL      | 2  | 3681  | 3699  | E=0.00826214   |                     |   |
| RH144F23-7-23529  |          | 11 | 5-6 | Y-1-TIR      | 1  | 6646  | 6693  | E=0.000375334  |                     | 1 |
| RH144F23-7-23529  |          | 11 | 5-6 | Bs4-TIR      | 2  | 6766  | 6925  | E=3.10592e-72  |                     |   |
| RH144F23-7-23529  |          | 11 | 5-6 | Bs4-NBS      | 3  | 6917  | 7271  | E=3.5837e-147  |                     |   |
| RH157M15-1-40191  | AC240040 | 11 | 5-6 | N-Nt-TIR     | -3 | 8003  | 8026  | E=4.641e-06    | RGH-CAPS16 (SH)     | 1 |
| RH157M15-1-40191  |          | 11 | 5-6 | Bs4-TIR      | -1 | 8015  | 8151  | E=1.49692e-57  |                     |   |

|                   |                  |          |     |            |          |       |       |                |                     |           |   |
|-------------------|------------------|----------|-----|------------|----------|-------|-------|----------------|---------------------|-----------|---|
| RH157M15-1-40191  |                  | 11       | 5-6 | Bs4-NBS    | -2       | 8189  | 8555  | E=1.3171e-146  |                     |           |   |
| RH157M15-1-40191  |                  | 11       | 5-6 | Bs4-NBS    | -1       | 8759  | 8792  | E=1.05024e-06  |                     |           |   |
| RH157M15-1-40191  |                  | 11       | 5-6 | Bs4-LRR    | -1       | 8816  | 8869  | E=1.07681e-16  |                     |           |   |
| RH157M15-1-40191  |                  | 11       | 5-6 | Y-1-LRR    | -3       | 9591  | 9945  | E=7.86862e-106 |                     |           |   |
| RH157M15-1-40191  |                  | 11       | 5-6 | N-Nt-CNL   | -3       | 9898  | 10044 | E=1.69554e-29  |                     |           |   |
| RH157M15-1-40191  |                  | 11       | 5-6 | Y-1-LRR    | -2       | 10740 | 10863 | E=9.04063e-30  |                     | 1         |   |
| RH157M15-2-45064  |                  | 11       | 5-6 | Rpp5-LRR   | -1       | 1358  | 1765  | E=2.47527e-32  |                     | 1         |   |
| RH157M15-2-45064  |                  | 11       | 5-6 | Bs4-CNL    | -1       | 1842  | 2001  | E=1.80689e-37  |                     |           |   |
| RH157M15-2-45064  |                  | 11       | 5-6 | Bs4-TIR    | -2       | 9297  | 9453  | E=9.44917e-62  |                     | 1         |   |
| RH157M15-2-45064  |                  | 11       | 5-6 | Bs4-NBS    | -2       | 9558  | 9930  | E=1.31795e-115 |                     |           |   |
| RH157M15-2-45064  |                  | 11       | 5-6 | Bs4-LRR    | -3       | 10049 | 10096 | E=3.55177e-15  |                     |           |   |
| RH157M15-2-45064  |                  | 11       | 5-6 | Y-1-LRR    | -1       | 10172 | 10532 | E=1.6688e-102  |                     |           |   |
| RH157M15-2-45064  |                  | 11       | 5-6 | Bs4-LRR    | -2       | 10999 | 11026 | E=8.99349e-05  |                     |           |   |
| RH157M15-2-45064  |                  | 11       | 5-6 | N-Nt-CNL   | -3       | 11328 | 11430 | E=1.65651e-23  |                     |           |   |
| RH157M15-3-9201   |                  | 11       | 5-6 | Bs4-NBS    | -1       | 710   | 786   | E=1.98918e-19  |                     | 1         |   |
| RH157M15-3-9201   |                  | 11       | 5-6 | Bs4-NBS    | -2       | 766   | 1062  | E=9.0539e-116  |                     |           |   |
| RH157M15-3-9201   |                  | 11       | 5-6 | Bs4-LRR    | -2       | 1363  | 1416  | E=8.10837e-17  |                     |           |   |
| RH157M15-3-9201   |                  | 11       | 5-6 | Y-1-LRR    | -1       | 2102  | 2456  | E=1.17445e-105 |                     |           |   |
| RH157M15-3-9201   |                  | 11       | 5-6 | N-Nt-CNL   | -1       | 2409  | 2555  | E=1.61275e-29  |                     |           |   |
| RH170N15-13-10834 | AC238340         | 11       | 5-6 | N-Nt-LRR   | -1       | 154   | 258   | E=9.01145e-18  | potato physical map | 1         |   |
| RH170N15-13-10834 |                  | 11       | 5-6 | Y-1-LRR    | -3       | 261   | 689   | E=2.51386e-99  |                     |           |   |
| RH170N15-13-10834 |                  | 11       | 5-6 | N-Nt-CNL   | -3       | 639   | 709   | E=8.87e-20     |                     |           |   |
| RH170N15-13-10834 |                  | 11       | 5-6 | N-Nt-CNL   | -1       | 1478  | 1587  | E=9.26666e-13  |                     |           |   |
| RH170N15-13-10834 |                  | 11       | 5-6 | Bs4-TIR    | -2       | 2737  | 2896  | E=4.79591e-70  |                     | 1         |   |
| RH170N15-13-10834 |                  | 11       | 5-6 | Bs4-NBS    | -1       | 2925  | 3149  | E=2.31847e-95  |                     |           |   |
| RH170N15-15-11634 |                  | 11       | 5-6 | Bs4-TIR    | -2       | 519   | 680   | E=2.60596e-73  |                     | 1         |   |
| RH170N15-15-11634 |                  | 11       | 5-6 | Bs4-NBS    | -1       | 767   | 1119  | E=6.36445e-123 |                     |           |   |
| RH170N15-15-11634 |                  | 11       | 5-6 | Bs4-LRR    | -3       | 1321  | 1374  | E=2.28372e-13  |                     |           |   |
| RH170N15-15-11634 |                  | 11       | 5-6 | Y-1-LRR    | -2       | 1533  | 1965  | E=2.50731e-108 |                     |           |   |
| RH170N15-15-11634 |                  | 11       | 5-6 | Bs4-CNL    | -2       | 1913  | 2087  | E=2.7203e-36   |                     |           |   |
| RH170N15-16-13869 |                  | 11       | 5-6 | Bs4-TIR    | -3       | 260   | 349   | E=1.32696e-41  |                     | 1         |   |
| RH170N15-16-13869 |                  | 11       | 5-6 | Bs4-TIR    | -2       | 337   | 404   | E=2.07335e-27  |                     |           |   |
| RH170N15-16-13869 |                  | 11       | 5-6 | Bs4-NBS    | -2       | 529   | 559   | E=0.01440806   |                     |           |   |
| RH170N15-16-13869 |                  | 11       | 5-6 | Bs4-NBS    | -3       | 1284  | 1639  | E=3.71285e-140 |                     |           |   |
| RH170N15-17-8047  |                  | 11       | 5-6 | Bs4-TIR    | -2       | 253   | 409   | E=4.09637e-67  |                     | 1         |   |
| RH170N15-17-8047  |                  | 11       | 5-6 | Y-1-NBS    | -3       | 454   | 800   | E=2.67054e-123 |                     |           |   |
| RH170N15-17-8047  |                  | 11       | 5-6 | Bs4-NBS    | -1       | 877   | 947   | E=2.20568e-08  |                     |           |   |
| RH170N15-17-8047  |                  | 11       | 5-6 | N-Nt-LRR   | -2       | 1198  | 1326  | E=1.13303e-33  |                     |           |   |
| RH170N15-17-8047  |                  | 11       | 5-6 | Y-1-LRR    | -1       | 1311  | 1562  | E=1.34227e-76  |                     |           |   |
| RH170N15-17-8047  |                  | 11       | 5-6 | Bs4-CNL    | -1       | 1514  | 1644  | E=1.72115e-32  |                     |           |   |
| RH170N15-18-3894  |                  | 11       | 5-6 | N-Nt-LRR   | -3       | 1     | 259   | E=4.10307e-84  |                     | 1         |   |
| RH170N15-18-3894  |                  | 11       | 5-6 | Lr21-NBS   | -3       | 293   | 361   | E=0.0275058    |                     |           |   |
| RH170N15-18-3894  |                  | 11       | 5-6 | Bs4-CNL    | -3       | 394   | 549   | E=2.11178e-46  |                     |           |   |
| RH170N15-20-3681  |                  | 11       | 5-6 | Y-1-NBS    | -3       | 89    | 132   | E=3.40445e-05  |                     | 1         |   |
| RH170N15-20-3681  |                  | 11       | 5-6 | N-Nt-LRR   | -3       | 280   | 451   | E=4.61311e-54  |                     |           |   |
| RH170N15-20-3681  |                  | 11       | 5-6 | Y-1-LRR    | -1       | 571   | 928   | E=4.88968e-49  |                     |           |   |
| RH170N15-20-3681  |                  | 11       | 5-6 | Y-1-CNL    | -2       | 910   | 975   | E=5.99916e-18  |                     |           |   |
| RH170N15-3-1832   |                  | 11       | 5-6 | Bs4-TIR    | -1       | 355   | 518   | E=3.35591e-64  |                     | 1         |   |
| RH139G21-10-8763  | AC240022         | 11       | 6-8 | Y-1-LRR    | -1       | 230   | 617   | E=4.77589e-159 | RGH-SSR33           | 1         |   |
| RH139G21-10-8763  |                  | 11       | 6-8 | Bs4-CNL    | -1       | 560   | 689   | E=2.33552e-44  |                     |           |   |
| RH139G21-12-5198  |                  | 11       | 6-8 | Bs4-LRR    | -3       | 242   | 289   | E=1.53006e-13  |                     | 1         |   |
| RH139G21-12-5198  |                  | 11       | 6-8 | Y-1-LRR    | 1        | 613   | 1015  | E=2.78954e-143 |                     |           |   |
| RH139G21-12-5198  |                  | 11       | 6-8 | N-Nt-CNL   | 1        | 962   | 1111  | E=1.90883e-52  |                     |           |   |
| RH139G21-12-5198  |                  | 11       | 6-8 | Bs4-TIR    | 1        | 1126  | 1283  | E=6.52481e-73  |                     | 1         |   |
| RH139G21-12-5198  |                  | 11       | 6-8 | Bs4-NBS    | 3        | 1401  | 1642  | E=4.41036e-93  |                     |           |   |
| RH139G21-15-3515  |                  | 11       | 6-8 | Y-1-TIR    | 1        | 153   | 311   | E=3.5839e-77   |                     | 1         |   |
| RH139G21-15-3515  |                  | 11       | 6-8 | Y-1-NBS    | 3        | 332   | 707   | E=3.69952e-150 |                     |           |   |
| RH139G21-15-3515  |                  | 11       | 6-8 | Y-1-NBS    | 1        | 780   | 847   | E=3.63313e-11  |                     |           |   |
| RH139G21-15-3515  |                  | 11       | 6-8 | Y-1-LRR    | -1       | 848   | 894   | E=1.23462e-19  |                     |           |   |
| RH139G21-16-10041 |                  | 11       | 6-8 | Gro1-4-NBS | -3       | 249   | 338   | E=1.35601e-05  |                     | 1         |   |
| RH139G21-16-10041 |                  | 11       | 6-8 | N-Nt-LRR   | -3       | 971   | 1254  | E=1.44763e-80  |                     |           |   |
| RH139G21-16-10041 |                  | 11       | 6-8 | R3a-LRR    | -3       | 1081  | 1435  | E=9.58888e-07  |                     |           |   |
| RH139G21-16-10041 |                  | 11       | 6-8 | Rpp4-LRR   | -3       | 1571  | 1981  | E=6.14654e-27  |                     |           |   |
| RH139G21-16-10041 |                  | 11       | 6-8 | N-Nt-CNL   | -3       | 2002  | 2151  | E=7.08656e-46  |                     |           |   |
| RH139G21-16-10041 |                  | 11       | 6-8 | N-Nt-CNL   | -1       | 2884  | 2918  | E=2.28643e-05  |                     |           |   |
| RH139G21-16-10041 |                  | 11       | 6-8 | N-Nt-CNL   | -2       | 2955  | 2990  | E=0.0208774    |                     |           |   |
| RH139G21-17-8004  |                  | 11       | 6-8 | Bs4-NBS    | 2        | 1     | 90    | E=4.69116e-24  |                     | 1         |   |
| RH139G21-17-8004  |                  | 11       | 6-8 | N-Nt-LRR   | 2        | 325   | 441   | E=5.1554e-16   |                     |           |   |
| RH139G21-18-2146  |                  | 11       | 6-8 | Y-1-TIR    | -1       | 194   | 350   | E=1.33091e-69  |                     | 1         |   |
| RH139G21-18-2146  |                  | 11       | 6-8 | Rpp5-TIR   | -2       | 368   | 421   | E=2.79547e-05  |                     |           |   |
| RH139G21-18-2146  |                  | 11       | 6-8 | Bs4-NBS    | -2       | 372   | 677   | E=1.0515e-117  |                     |           |   |
| RH139G21-20-8533  |                  | 11       | 6-8 | Bs4-NBS    | -1       | 1     | 85    | E=6.60464e-24  |                     |           |   |
| RH139G21-20-8533  |                  | 11       | 6-8 | P2-NBS     | -3       | 303   | 352   | E=3.76485e-05  |                     |           |   |
| RH139G21-20-8533  |                  | 11       | 6-8 | N-Nt-LRR   | -3       | 635   | 915   | E=3.39054e-80  |                     |           |   |
| RH139G21-20-8533  |                  | 11       | 6-8 | Lr21-NBS   | -3       | 902   | 979   | E=0.00554223   |                     |           |   |
| RH139G21-20-8533  |                  | 11       | 6-8 | N-Nt-LRR   | -2       | 1384  | 1544  | E=3.11229e-30  |                     |           |   |
| RH139G21-20-8533  |                  | 11       | 6-8 | N-Nt-CNL   | -2       | 1544  | 1701  | E=2.69055e-48  |                     |           |   |
| RH139G21-20-8533  |                  | 11       | 6-8 | Y-1-CNL    | -1       | 2230  | 2306  | E=3.32714e-08  |                     |           |   |
| RH139G21-20-8533  |                  | 11       | 6-8 | N-Nt-CNL   | -3       | 2303  | 2334  | E=0.00406857   |                     |           |   |
| RH139G21-3-3153   |                  | 11       | 6-8 | Y-1-LRR    | -2       | 155   | 531   | E=5.72858e-136 |                     | 1         |   |
| RH139G21-3-3153   |                  | 11       | 6-8 | Bs4-CNL    | -2       | 478   | 578   | E=1.70537e-35  |                     |           |   |
| RH139G21-3-3153   |                  | 11       | 6-8 | N-Nt-CNL   | -1       | 554   | 612   | E=2.88146e-13  |                     |           |   |
| RH139G21-3-3153   |                  | 11       | 6-8 | Bs4-TIR    | -1       | 629   | 785   | E=4.75744e-69  |                     | 1         |   |
| RH139G21-3-3153   |                  | 11       | 6-8 | Bs4-NBS    | -1       | 948   | 1013  | E=3.36386e-20  |                     |           |   |
| RH139G21-9-3079   |                  | 11       | 6-8 | Y-1-TIR    | -2       | 535   | 705   | E=5.64706e-34  |                     | 1         |   |
| RH139G21-9-3079   |                  | 11       | 6-8 | N-Nt-NBS   | -2       | 773   | 988   | E=4.40169e-69  |                     |           |   |
| Xib-CNL           | RH044H02-2-31394 | AC238022 | 11  | 57-62      | I2-CC    | -1    | 2844  | 2996           | E=8.68455e-58       | RGH-SSR10 | 1 |
|                   | RH044H02-2-31394 |          | 11  | 57-62      | R1-LRR   | -1    | 4528  | 4783           | E=1.25293e-05       |           |   |
|                   | RH044H02-2-31394 |          | 11  | 57-62      | Rpp1-LRR | 3     | 4735  | 4821           | E=0.0439814         |           |   |
|                   | RH044H02-2-31394 |          | 11  | 57-62      | R3a-CC   | -1    | 5440  | 5603           | E=1.87112e-56       |           | 1 |
|                   | RH044H02-2-31394 |          | 11  | 57-62      | R3a-NBS  | -1    | 5604  | 5986           | E=4.73556e-174      |           |   |
|                   | RH044H02-2-31394 |          | 11  | 57-62      | R3a-LRR  | -1    | 5987  | 6557           | E=0.0               |           |   |
|                   | RH044H02-2-31394 |          | 11  | 57-62      | LR1-LRR  | -1    | 6730  | 6785           | E=0.00151703        |           |   |
|                   | RH044H02-4-14434 |          | 11  | 57-62      | R3a-CC   | -2    | 3415  | 3446           | E=0.000145443       |           | 1 |
|                   | RH044H02-5-33078 |          | 11  | 57-62      | I2-CC    | -2    | 417   | 555            | E=3.72196e-45       |           | 1 |
|                   | RH044H02-5-33078 |          | 11  | 57-62      | R3a-NBS  | -2    | 557   | 905            | E=1.21203e-126      |           |   |
|                   | RH044H02-5-33078 |          | 11  | 57-62      | I2-LRR   | -2    | 906   | 1659           | E=0.0               |           |   |
|                   | RH044H02-7-5022  |          | 11  | 57-62      | R3a-LRR  | -2    | 432   | 585            | E=4.14851e-19       |           | 1 |



|                   |                   |          |       |              |              |       |       |                |                |                                 |   |
|-------------------|-------------------|----------|-------|--------------|--------------|-------|-------|----------------|----------------|---------------------------------|---|
| Xlc-TNL           | RH124N10-4-12711  | AC240011 | 11    | 59-63        | Bs4-TIR      | -1    | 2188  | 2308           | E=8.69779e-60  | RGH-CAPS8                       | 1 |
|                   | RH124N10-4-12711  |          | 11    | 59-63        | Bs4-NBS      | -1    | 2514  | 2823           | E=4.72515e-143 |                                 |   |
|                   | RH124N10-4-12711  |          | 11    | 59-63        | N-Nt-LRR     | -3    | 2830  | 3350           | E=9.9102e-93   |                                 |   |
|                   | RH124N10-4-12711  |          | 11    | 59-63        | Bs4-CNL      | -3    | 3351  | 3506           | E=7.37594e-49  |                                 |   |
|                   | RH125M10-3-16235  | AC240014 | 11    | 59-63        | Y-1-LRR      | -1    | 2450  | 2616           | E=4.44052e-36  | potato physical map             | 1 |
| Xld-CNL           | RH128F11-2-31745  | AC240015 | 11    | 77           | Rpi-blb2-CC  | -1    | 5087  | 5325           | E=1.87613e-71  | potato physical map             | 1 |
|                   | RH128F11-2-31745  |          | 11    | 77           | Rpi-blb2-NBS | -1    | 5819  | 5991           | E=2.26706e-84  |                                 |   |
|                   | RH128F11-2-31745  |          | 11    | 77           | Mi-1-LRR     | -2    | 5977  | 6102           | E=1.57517e-43  |                                 |   |
|                   | RH128F11-2-31745  |          | 11    | 77           | CaMi-CC      | -3    | 8410  | 8959           | E=0.0          |                                 | 1 |
|                   | RH128F11-2-31745  |          | 11    | 77           | Rpi-blb2-NBS | -3    | 8950  | 9302           | E=1.56026e-164 |                                 |   |
| RH128F11-2-31745  |                   | 11       | 77    | Rpi-blb2-LRR | -3           | 9303  | 9663  | E=1.50265e-148 |                |                                 |   |
| Xle-CNL           | RH013115-1-1337   | AC239967 | 11    | 82-83        | R3a-LRR      | 1     | 210   | 371            | E=1.51465e-12  | RGH-CAPS4                       | 1 |
|                   | RH013115-11-18245 |          | 11    | 82-83        | I2-CC        | -1    | 145   | 305            | E=8.11671e-61  |                                 | 1 |
|                   | RH013115-11-18245 |          | 11    | 82-83        | R3a-NBS      | -1    | 306   | 691            | E=0.0          |                                 |   |
|                   | RH013115-11-18245 |          | 11    | 82-83        | I2-LRR       | -1    | 692   | 1416           | E=0.0          |                                 |   |
|                   | RH022H03-1-1889   | AC237958 | 11    | 82-83        | R3a-CC       | 1     | 1     | 88             | E=4.56676e-29  | NBS profiling                   | 1 |
|                   | RH022H03-1-1889   |          | 11    | 82-83        | R3a-NBS      | 1     | 89    | 469            | E=5.64281e-145 |                                 |   |
|                   | RH022H03-1-1889   |          | 11    | 82-83        | R3a-LRR      | 1     | 470   | 629            | E=1.42243e-56  |                                 |   |
|                   | RH022H03-2-118380 |          | 11    | 82-83        | R3a-NBS      | 3     | 1     | 251            | E=1.0979e-93   |                                 | 1 |
|                   | RH022H03-2-118380 |          | 11    | 82-83        | I2-LRR       | 3     | 252   | 989            | E=0.0          |                                 |   |
|                   | RH022H03-2-118380 |          | 11    | 82-83        | R3a-NBS      | 2     | 4159  | 4540           | E=4.53183e-153 |                                 | 1 |
|                   | RH022H03-2-118380 |          | 11    | 82-83        | Y-1-LRR      | 2     | 4849  | 5142           | E=0.000155331  |                                 |   |
|                   | RH022H03-2-118380 |          | 11    | 82-83        | I2-CC        | 2     | 24200 | 24364          | E=1.12612e-53  |                                 | 1 |
|                   | RH022H03-2-118380 |          | 11    | 82-83        | I2-NBS       | 2     | 24366 | 24740          | E=1.34722e-148 |                                 |   |
|                   | RH022H03-2-118380 |          | 11    | 82-83        | R3a-LRR      | 2     | 24741 | 25424          | E=0.0          |                                 |   |
|                   | RH022H03-2-118380 |          | 11    | 82-83        | R3a-NBS      | 1     | 30985 | 31031          | E=9.44696e-08  |                                 | 1 |
|                   | RH022H03-2-118380 |          | 11    | 82-83        | Rpg1-b-LRR   | 2     | 31108 | 31792          | E=6.27489e-68  |                                 |   |
|                   | RH028M02-1-1603   | AC237973 | 11    | 82-83        | I2-LRR       | -3    | 1     | 161            | E=9.23694e-50  | RGH-SSR6                        | 1 |
|                   | RH028M02-1-1603   |          | 11    | 82-83        | R3a-LRR      | -2    | 146   | 288            | E=1.09038e-52  |                                 |   |
|                   | RH028M02-10-2319  |          | 11    | 82-83        | I2-NBS       | -2    | 107   | 139            | E=0.0116005    |                                 | 1 |
|                   | RH028M02-10-2319  |          | 11    | 82-83        | I2-LRR       | -2    | 140   | 194            | E=1.55411e-10  |                                 |   |
|                   | RH028M02-17-5270  |          | 11    | 82-83        | R3a-NBS      | -3    | 1311  | 1478           | E=1.48859e-79  |                                 | 1 |
|                   | RH028M02-17-5270  |          | 11    | 82-83        | R3a-LRR      | -3    | 1476  | 1660           | E=8.56727e-79  |                                 |   |
|                   | RH028M02-2-4213   |          | 11    | 82-83        | R3a-CC       | -2    | 1143  | 1209           | E=6.07706e-22  |                                 | 1 |
|                   | RH028M02-3-5082   |          | 11    | 82-83        | I2-CC        | -2    | 251   | 417            | E=6.90672e-71  |                                 | 1 |
|                   | RH028M02-3-5082   |          | 11    | 82-83        | I2-NBS       | -2    | 418   | 803            | E=0.0          |                                 |   |
|                   | RH028M02-3-5082   |          | 11    | 82-83        | I2-LRR       | -2    | 804   | 1392           | E=0.0          |                                 |   |
|                   | RH028M02-3-5082   |          | 11    | 82-83        | I2-LRR       | -3    | 1313  | 1452           | E=8.61104e-33  |                                 |   |
|                   | RH028M02-5-7067   |          | 11    | 82-83        | I2-LRR       | -3    | 6     | 189            | E=2.24203e-41  |                                 | 1 |
|                   | RH092I19-16-5288  | AC240003 | 11    | 82-83        | I2-CC        | 1     | 263   | 418            | E=6.64374e-61  | RGH-SSR25 (SH)                  | 1 |
|                   | RH092I19-16-5288  |          | 11    | 82-83        | R3a-NBS      | 1     | 419   | 623            | E=1.85663e-94  |                                 |   |
|                   | RH092I19-16-5288  |          | 11    | 82-83        | I2-NBS       | 3     | 575   | 758            | E=4.46494e-73  |                                 |   |
|                   | RH092I19-16-5288  |          | 11    | 82-83        | I2-LRR       | 3     | 759   | 1447           | E=0.0          |                                 |   |
|                   | RH092I19-2-5293   |          | 11    | 82-83        | R3a-CC       | 3     | 334   | 500            | E=2.26107e-65  |                                 | 1 |
|                   | RH092I19-2-5293   |          | 11    | 82-83        | R3a-NBS      | 3     | 501   | 883            | E=5.60694e-167 |                                 |   |
|                   | RH092I19-2-5293   |          | 11    | 82-83        | I2-LRR       | 3     | 884   | 1584           | E=0.0          |                                 |   |
|                   | RH202G21-1-15573  | AC240069 | 11    | 82-83        | I2-CC        | -2    | 27    | 187            | E=9.28672e-57  | potato physical map/BACend tool | 1 |
|                   | RH202G21-1-15573  |          | 11    | 82-83        | R3a-NBS      | -2    | 188   | 573            | E=0.0          |                                 |   |
|                   | RH202G21-1-15573  |          | 11    | 82-83        | I2-LRR       | -2    | 574   | 1338           | E=0.0          |                                 |   |
|                   | RH202G21-1-15573  |          | 11    | 82-83        | R3a-CC       | -3    | 3227  | 3248           | E=2.50094e-05  |                                 | 1 |
|                   | RH202G21-1-15573  |          | 11    | 82-83        | I2-NBS       | -3    | 3249  | 3634           | E=0.0          |                                 |   |
|                   | RH202G21-1-15573  |          | 11    | 82-83        | I2-LRR       | -3    | 3635  | 4361           | E=0.0          |                                 |   |
|                   | RH202G21-8-12962  |          | 11    | 82-83        | I2-CC        | -3    | 711   | 871            | E=1.3841e-61   |                                 | 1 |
|                   | RH202G21-8-12962  |          | 11    | 82-83        | R3a-NBS      | -3    | 872   | 1253           | E=0.0          |                                 |   |
|                   | RH202G21-8-12962  |          | 11    | 82-83        | I2-LRR       | -3    | 1255  | 1978           | E=0.0          |                                 |   |
|                   | RH010P17-3-38584  | AC239965 | 11    | 84-86        | I2-CC        | -1    | 9811  | 9971           | E=6.5319e-62   | BACend tool                     | 1 |
|                   | RH010P17-3-38584  |          | 11    | 84-86        | R3a-NBS      | -1    | 9972  | 10354          | E=1.2657e-178  |                                 |   |
|                   | RH010P17-3-38584  |          | 11    | 84-86        | R3a-LRR      | -1    | 10355 | 10690          | E=4.80422e-146 |                                 |   |
|                   | RH010P17-3-38584  |          | 11    | 84-86        | R3a-LRR      | -2    | 10591 | 10987          | E=4.36544e-131 |                                 |   |
|                   | RH010P17-4-52174  |          | 11    | 84-86        | R3a-CC       | -3    | 5741  | 5907           | E=9.81063e-68  |                                 | 1 |
|                   | RH010P17-4-52174  |          | 11    | 84-86        | R3a-NBS      | -3    | 5908  | 6296           | E=0.0          |                                 |   |
| RH010P17-4-52174  |                   | 11       | 84-86 | I2-LRR       | -3           | 6297  | 7002  | E=0.0          |                |                                 |   |
| RH010P17-4-52174  |                   | 11       | 84-86 | I2-CC        | -1           | 13241 | 13401 | E=1.26272e-61  |                | 1                               |   |
| RH010P17-4-52174  |                   | 11       | 84-86 | R3a-NBS      | -1           | 13402 | 13784 | E=0.0          |                |                                 |   |
| RH010P17-4-52174  |                   | 11       | 84-86 | I2-LRR       | -1           | 13785 | 14516 | E=0.0          |                |                                 |   |
| RH019C05-5-17229  | AC234529          | 11       | 84-86 | I2-CC        | -3           | 344   | 508   | E=9.72956e-69  | BACend tool    | 1                               |   |
| RH019C05-5-17229  |                   | 11       | 84-86 | R3a-NBS      | -3           | 509   | 893   | E=0.0          |                |                                 |   |
| RH019C05-5-17229  |                   | 11       | 84-86 | R3a-LRR      | -3           | 894   | 1242  | E=1.23831e-160 |                |                                 |   |
| RH019C05-5-17229  |                   | 11       | 84-86 | I2-NBS       | -2           | 1     | 274   | E=2.54017e-119 |                | 1                               |   |
| RH019C05-7-35371  |                   | 11       | 84-86 | R3a-LRR      | -2           | 275   | 610   | E=1.50682e-145 |                |                                 |   |
| RH019C05-7-35371  |                   | 11       | 84-86 | R3a-LRR      | -3           | 548   | 944   | E=1.45155e-130 |                |                                 |   |
| RH028E12-11-3311  | AC237970          | 11       | 84-86 | I2-LRR       | 2            | 1     | 48    | E=3.76237e-11  | NBS profiling  | 1                               |   |
| RH028E12-12-11571 |                   | 11       | 84-86 | I2-LRR       | -1           | 2     | 522   | E=1.42602e-134 |                | 1                               |   |
| RH028E12-15-4491  |                   | 11       | 84-86 | R3a-LRR      | -3           | 6     | 637   | E=3.1607e-180  |                | 1                               |   |
| RH028E12-17-4563  |                   | 11       | 84-86 | R3a-NBS      | -1           | 1     | 137   | E=4.70422e-53  |                | 1                               |   |
| RH028E12-17-4563  |                   | 11       | 84-86 | R3a-LRR      | -1           | 138   | 394   | E=3.27144e-90  |                |                                 |   |
| RH028E12-2-5648   |                   | 11       | 84-86 | R3a-LRR      | -3           | 1259  | 1723  | E=8.5345e-121  |                | 1                               |   |
| RH028E12-4-5572   |                   | 11       | 84-86 | R3a-NBS      | -1           | 1     | 202   | E=6.94288e-63  |                | 1                               |   |
| RH028E12-4-5572   |                   | 11       | 84-86 | I2-LRR       | 1            | 203   | 544   | E=1.82644e-115 |                |                                 |   |
| RH028E12-4-5572   |                   | 11       | 84-86 | Xa1-LRR      | 1            | 1464  | 1793  | E=0.000335989  |                |                                 |   |
| RH028E12-6-10746  |                   | 11       | 84-86 | R3a-NBS      | -2           | 1     | 158   | E=1.06316e-60  |                | 1                               |   |
| RH028E12-6-10746  |                   | 11       | 84-86 | R3a-LRR      | -2           | 159   | 902   | E=0.0          |                |                                 |   |
| RH028E12-6-10746  |                   | 11       | 84-86 | LR1-NBS      | -1           | 1238  | 1490  | E=1.56314e-13  |                | 1                               |   |
| RH028E12-6-10746  |                   | 11       | 84-86 | R3a-LRR      | -1           | 1263  | 1818  | E=0.0          |                |                                 |   |
| RH028E12-6-10746  |                   | 11       | 84-86 | Nrg1-LRR     | -2           | 1836  | 1914  | E=0.000970453  |                |                                 |   |
| RH034M10-3-55883  | AC239975          | 11       | 84-86 | R3a-LRR      | -1           | 1146  | 1445  | E=7.27534e-96  | RGH-CAPS5      | 1                               |   |
| RH034M10-3-55883  |                   | 11       | 84-86 | I2-CC        | -3           | 12051 | 12217 | E=7.45614e-66  |                | 1                               |   |
| RH034M10-3-55883  |                   | 11       | 84-86 | R3a-NBS      | -3           | 12218 | 12600 | E=8.9257e-175  |                |                                 |   |
| RH034M10-3-55883  |                   | 11       | 84-86 | I2-LRR       | -3           | 12601 | 13335 | E=0.0          |                |                                 |   |
| RH034M10-4-37945  |                   | 11       | 84-86 | R3a-CC       | -1           | 378   | 544   | E=2.90165e-68  |                | 1                               |   |
| RH034M10-4-37945  |                   | 11       | 84-86 | R3a-NBS      | -1           | 545   | 927   | E=0.0          |                |                                 |   |
| RH034M10-4-37945  |                   | 11       | 84-86 | I2-LRR       | -1           | 928   | 1649  | E=0.0          |                |                                 |   |
| RH042N17-10-16305 | AC237835          | 11       | 84-86 | I2-CC        | -3           | 1705  | 1869  | E=2.4615e-61   | BACend tool    | 1                               |   |
| RH042N17-10-16305 |                   | 11       | 84-86 | R3a-NBS      | -3           | 1872  | 2248  | E=7.38852e-165 |                |                                 |   |
| RH042N17-10-16305 |                   | 11       | 84-86 | I2-LRR       | -3           | 2249  | 2991  | E=0.0          |                |                                 |   |
| RH042N17-13-11949 |                   | 11       | 84-86 | I2-CC        | -2           | 669   | 833   | E=8.59243e-66  |                | 1                               |   |
| RH042N17-13-11949 |                   | 11       | 84-86 | I2-NBS       | -2           | 836   | 1212  | E=3.00478e-144 |                |                                 |   |
| RH042N17-13-11949 |                   | 11       | 84-86 | R3a-LRR      | -2           | 1213  | 1982  | E=0.0          |                |                                 |   |

|                   |          |    |       |             |    |       |       |                |                     |   |
|-------------------|----------|----|-------|-------------|----|-------|-------|----------------|---------------------|---|
| RH042N17-5-27364  |          | 11 | 84-86 | R3a-CC      | -3 | 6514  | 6678  | E=2.9599e-57   |                     | 1 |
| RH042N17-5-27364  |          | 11 | 84-86 | I2-NBS      | -3 | 6681  | 6848  | E=1.33822e-56  |                     |   |
| RH042N17-5-27364  |          | 11 | 84-86 | R3a-NBS     | -1 | 7074  | 7283  | E=9.71832e-83  |                     |   |
| RH042N17-5-27364  |          | 11 | 84-86 | I2-LRR      | -1 | 7284  | 8028  | E=0.0          |                     |   |
| RH042N17-8-5986   |          | 11 | 84-86 | R3a-CC      | 3  | 1281  | 1386  | E=6.76742e-25  |                     | 1 |
| RH042N17-9-6580   |          | 11 | 84-86 | R3a-CC      | -3 | 588   | 644   | E=2.02831e-08  |                     | 1 |
| RH042N17-9-6580   |          | 11 | 84-86 | I2-NBS      | -3 | 647   | 941   | E=1.3393e-82   |                     |   |
| RH042N17-9-6580   |          | 11 | 84-86 | R3a-LRR     | -2 | 914   | 1099  | E=1.17909e-70  |                     |   |
| RH042N17-9-6580   |          | 11 | 84-86 | I2-LRR      | -1 | 1090  | 1171  | E=1.49233e-06  |                     |   |
| RH042N17-9-6580   |          | 11 | 84-86 | R3a-LRR     | -3 | 1216  | 1563  | E=1.13248e-94  |                     |   |
| RH043J22-3-59703  | AC237837 | 11 | 84-86 | Rpi-blb1-CC | 1  | 3324  | 3496  | E=2.03175e-06  | BACend tool         | 1 |
| RH043J22-3-59703  |          | 11 | 84-86 | I2-NBS      | 1  | 3476  | 3862  | E=0.0          |                     |   |
| RH043J22-3-59703  |          | 11 | 84-86 | I2-LRR      | 1  | 3863  | 4568  | E=0.0          |                     |   |
| RH043J22-3-59703  |          | 11 | 84-86 | R3a-CC      | 1  | 8655  | 8821  | E=1.43966e-68  |                     | 1 |
| RH043J22-3-59703  |          | 11 | 84-86 | LR1-NBS     | 1  | 8823  | 9510  | E=1.15709e-72  |                     |   |
| RH043J22-3-59703  |          | 11 | 84-86 | R3a-LRR     | 1  | 9205  | 9978  | E=0.0          |                     |   |
| RH043J22-3-59703  |          | 11 | 84-86 | I2-NBS      | 3  | 11653 | 11749 | E=1.88037e-34  |                     | 1 |
| RH043J22-3-59703  |          | 11 | 84-86 | R3a-LRR     | 2  | 11836 | 11902 | E=6.45199e-21  |                     |   |
| RH043J22-3-59703  |          | 11 | 84-86 | R3a-LRR     | 3  | 11881 | 11959 | E=4.0775e-21   |                     |   |
| RH043J22-3-59703  |          | 11 | 84-86 | I2-LRR      | 2  | 11990 | 12142 | E=1.85107e-40  |                     |   |
| RH054B22-1-1938   |          | 11 | 84-86 | R3a-LRR     | -2 | 304   | 392   | E=3.64671e-32  | RGH-SSR14           | 1 |
| RH054B22-1-1938   |          | 11 | 84-86 | I2-LRR      | -3 | 410   | 488   | E=2.59346e-28  |                     |   |
| RH054B22-12-6614  |          | 11 | 84-86 | I2-NBS      | 2  | 542   | 638   | E=1.71647e-32  |                     | 1 |
| RH054B22-12-6614  |          | 11 | 84-86 | R3a-LRR     | 1  | 679   | 761   | E=8.68985e-30  |                     |   |
| RH054B22-12-6614  |          | 11 | 84-86 | I2-LRR      | 2  | 809   | 992   | E=1.92937e-41  |                     |   |
| RH054B22-13-4626  |          | 11 | 84-86 | R3a-CC      | 3  | 1071  | 1237  | E=3.60044e-72  |                     | 1 |
| RH054B22-13-4626  |          | 11 | 84-86 | R3a-NBS     | 3  | 1238  | 1477  | E=5.42201e-110 |                     |   |
| RH054B22-14-1741  |          | 11 | 84-86 | R3a-CC      | 3  | 137   | 302   | E=8.25053e-61  |                     | 1 |
| RH054B22-14-1741  |          | 11 | 84-86 | R3a-NBS     | 3  | 303   | 566   | E=3.33702e-115 |                     |   |
| RH054B22-15-2197  |          | 11 | 84-86 | I2-LRR      | 1  | 6     | 682   | E=0.0          |                     | 1 |
| RH054B22-17-1172  |          | 11 | 84-86 | R3a-LRR     | -3 | 1     | 120   | E=4.51184e-46  |                     | 1 |
| RH054B22-17-1172  |          | 11 | 84-86 | R3a-LRR     | -1 | 91    | 380   | E=1.15421e-86  |                     |   |
| RH054B22-4-4095   |          | 11 | 84-86 | R3a-NBS     | 3  | 1     | 343   | E=4.68292e-155 |                     | 1 |
| RH054B22-4-4095   |          | 11 | 84-86 | I2-LRR      | 3  | 344   | 1092  | E=0.0          |                     |   |
| RH071A13-2-48547  | AC238099 | 11 | 84-86 | I2-CC       | -3 | 5793  | 5959  | E=3.98556e-68  | RGH-SSR18           | 1 |
| RH071A13-2-48547  |          | 11 | 84-86 | R3a-NBS     | -3 | 5960  | 6364  | E=2.169e-162   |                     |   |
| RH071A13-2-48547  |          | 11 | 84-86 | I2-LRR      | -3 | 6365  | 7115  | E=0.0          |                     |   |
| RH071A13-2-48547  |          | 11 | 84-86 | I2-CC       | -2 | 7638  | 7802  | E=1.41795e-64  |                     | 1 |
| RH071A13-2-48547  |          | 11 | 84-86 | I2-NBS      | -2 | 7805  | 8181  | E=4.18918e-149 |                     |   |
| RH071A13-2-48547  |          | 11 | 84-86 | I2-LRR      | -2 | 8182  | 8949  | E=0.0          |                     |   |
| RH071A13-2-48547  |          | 11 | 84-86 | I2-CC       | -1 | 14607 | 14660 | E=1.20917e-09  |                     | 1 |
| RH071A13-2-48547  |          | 11 | 84-86 | I2-NBS      | -1 | 14663 | 15039 | E=5.51228e-152 |                     |   |
| RH071A13-2-48547  |          | 11 | 84-86 | R3a-LRR     | -1 | 15040 | 15111 | E=9.08635e-20  |                     |   |
| RH071A13-5-34390  |          | 11 | 84-86 | R3a-LRR     | 3  | 315   | 600   | E=3.78423e-77  |                     | 1 |
| RH071A13-5-34390  |          | 11 | 84-86 | R3a-CC      | 2  | 2616  | 2655  | E=2.41395e-12  |                     | 1 |
| RH071A13-5-34390  |          | 11 | 84-86 | I2-CC       | 1  | 2970  | 3134  | E=6.11013e-62  |                     |   |
| RH071A13-5-34390  |          | 11 | 84-86 | R3a-LRR     | 1  | 3514  | 4260  | E=0.0          |                     |   |
| RH071A13-5-34390  |          | 11 | 84-86 | Rpg1-b-CC   | 1  | 7960  | 8159  | E=3.59606e-22  |                     | 1 |
| RH071A13-5-34390  |          | 11 | 84-86 | R3a-NBS     | 1  | 8121  | 8530  | E=2.49955e-162 |                     |   |
| RH071A13-5-34390  |          | 11 | 84-86 | Rp1D-LRR    | 1  | 8563  | 8781  | E=1.24408e-22  |                     |   |
| RH071O09-12-6216  | AC239991 | 11 | 84-86 | R3a-LRR     | -2 | 1     | 48    | E=5.34238e-10  | BACend tool         | 1 |
| RH071O09-12-6216  |          | 11 | 84-86 | R3a-LRR     | -1 | 43    | 73    | E=0.114418     |                     |   |
| RH071O09-3-9914   |          | 11 | 84-86 | I2-CC       | 3  | 2512  | 2655  | E=5.50913e-45  |                     | 1 |
| RH071O09-3-9914   |          | 11 | 84-86 | R3a-NBS     | 3  | 2656  | 2697  | E=0.000277409  |                     |   |
| RH071O09-4-6676   |          | 11 | 84-86 | R3a-NBS     | 2  | 1     | 92    | E=2.06541e-43  |                     | 1 |
| RH071O09-4-6676   |          | 11 | 84-86 | PM3b-LRR    | 2  | 144   | 223   | E=4.2788e-10   |                     |   |
| RH071O09-4-6676   |          | 11 | 84-86 | R3a-LRR     | 2  | 1400  | 1958  | E=0.0          |                     |   |
| RH071O09-6-6361   |          | 11 | 84-86 | R3a-LRR     | -2 | 1     | 53    | E=9.47893e-18  |                     | 1 |
| RH071O09-6-6361   |          | 11 | 84-86 | I2-LRR      | -1 | 213   | 417   | E=8.13901e-26  |                     |   |
| RH071O09-8-3309   |          | 11 | 84-86 | R3a-CC      | 1  | 675   | 841   | E=7.96585e-67  |                     | 1 |
| RH071O09-8-3309   |          | 11 | 84-86 | R3a-NBS     | 1  | 842   | 1048  | E=2.55523e-86  |                     |   |
| RH072C08-1-100773 | AC239992 | 11 | 84-86 | I2-CC       | 2  | 5713  | 5876  | E=1.57046e-57  | potato physical map | 1 |
| RH072C08-1-100773 |          | 11 | 84-86 | I2-NBS      | 1  | 5840  | 5973  | E=4.56647e-53  |                     |   |
| RH072C08-1-100773 |          | 11 | 84-86 | R3a-NBS     | 3  | 5977  | 6211  | E=1.95081e-96  |                     |   |
| RH072C08-1-100773 |          | 11 | 84-86 | R3a-LRR     | 3  | 6212  | 6810  | E=0.0          |                     |   |
| RH072C08-1-100773 |          | 11 | 84-86 | I2-LRR      | 2  | 6768  | 6868  | E=3.12507e-18  |                     |   |
| RH072C08-1-100773 |          | 11 | 84-86 | R3a-CC      | -2 | 8936  | 9103  | E=1.07818e-58  |                     | 1 |
| RH072C08-1-100773 |          | 11 | 84-86 | CaMi-NBS    | -2 | 9150  | 9487  | E=2.45829e-20  |                     |   |
| RH072C08-1-100773 |          | 11 | 84-86 | Rp1D-LRR    | -2 | 9517  | 9738  | E=2.46382e-25  |                     |   |
| RH072C08-1-100773 |          | 11 | 84-86 | R3a-LRR     | -3 | 9966  | 10198 | E=2.0706e-56   |                     |   |
| RH072C08-1-100773 |          | 11 | 84-86 | I2-CC       | -3 | 12677 | 12745 | E=2.43217e-16  |                     | 1 |
| RH072C08-1-100773 |          | 11 | 84-86 | I2-NBS      | -2 | 13122 | 13508 | E=0.0          |                     |   |
| RH072C08-1-100773 |          | 11 | 84-86 | R3a-LRR     | -2 | 13509 | 14266 | E=0.0          |                     |   |
| RH136H12-1-9587   | AC240020 | 11 | 84-86 | I2-LRR      | 3  | 704   | 855   | E=6.4856e-61   | RGH-SSR32           | 1 |
| RH136H12-1-9587   |          | 11 | 84-86 | R3a-LRR     | 1  | 834   | 972   | E=1.64396e-46  |                     |   |
| RH136H12-1-9587   |          | 11 | 84-86 | Xa1-LRR     | -3 | 2022  | 2132  | E=1.54552e-06  |                     |   |
| RH136H12-2-51760  |          | 11 | 84-86 | I2-CC       | -1 | 4469  | 4569  | E=1.88427e-33  |                     | 1 |
| RH136H12-2-51760  |          | 11 | 84-86 | R3a-NBS     | -1 | 4570  | 4644  | E=1.36295e-09  |                     |   |
| RH136H12-2-51760  |          | 11 | 84-86 | R3a-CC      | -3 | 5698  | 5864  | E=3.57571e-67  |                     | 1 |
| RH136H12-2-51760  |          | 11 | 84-86 | R3a-NBS     | -3 | 5865  | 6247  | E=1.82926e-174 |                     |   |
| RH136H12-2-51760  |          | 11 | 84-86 | I2-LRR      | -3 | 6248  | 6996  | E=0.0          |                     |   |
| RH136H12-3-3586   |          | 11 | 84-86 | R3a-CC      | 3  | 343   | 509   | E=2.15066e-65  |                     | 1 |
| RH136H12-3-3586   |          | 11 | 84-86 | I2-NBS      | 3  | 510   | 877   | E=4.96401e-168 |                     |   |
| RH136H12-3-3586   |          | 11 | 84-86 | R3a-LRR     | 2  | 837   | 1114  | E=8.5345e-121  |                     |   |
| RH136H12-4-12604  |          | 11 | 84-86 | R3a-CC      | -3 | 3406  | 3445  | E=1.27962e-14  |                     | 1 |
| RH136H12-5-7891   |          | 11 | 84-86 | R3a-CC      | -1 | 1219  | 1385  | E=8.57463e-72  |                     | 1 |
| RH136H12-5-7891   |          | 11 | 84-86 | R3a-NBS     | -1 | 1386  | 1778  | E=0.0          |                     |   |
| RH136H12-5-7891   |          | 11 | 84-86 | I2-LRR      | -1 | 1779  | 2310  | E=0.0          |                     |   |
| RH136H12-5-7891   |          | 11 | 84-86 | R3a-LRR     | -2 | 2226  | 2441  | E=6.49622e-55  |                     |   |
| RH136H12-6-10240  |          | 11 | 84-86 | R3a-CC      | -3 | 739   | 903   | E=5.03713e-65  |                     | 1 |
| RH136H12-6-10240  |          | 11 | 84-86 | R3a-NBS     | -3 | 904   | 1294  | E=0.0          |                     |   |
| RH136H12-6-10240  |          | 11 | 84-86 | R1-LRR      | -3 | 1160  | 1249  | E=0.0377248    |                     |   |
| RH136H12-6-10240  |          | 11 | 84-86 | I2-LRR      | -1 | 1287  | 1960  | E=0.0          |                     |   |
| RH136H12-7-21168  |          | 11 | 84-86 | R3a-CC      | -1 | 2783  | 2949  | E=5.89903e-67  |                     | 1 |
| RH136H12-7-21168  |          | 11 | 84-86 | R3a-NBS     | -1 | 2950  | 3332  | E=1.79638e-179 |                     |   |
| RH136H12-7-21168  |          | 11 | 84-86 | I2-LRR      | -1 | 3333  | 4023  | E=0.0          |                     |   |
| RH136H12-7-21168  |          | 11 | 84-86 | R3a-CC      | -2 | 5345  | 5384  | E=3.63002e-15  |                     | 1 |
| RH136H12-7-21168  |          | 11 | 84-86 | R3a-NBS     | -3 | 5485  | 5777  | E=3.43132e-134 |                     |   |

|                   |                   |          |       |             |          |      |      |                |                     |             |   |
|-------------------|-------------------|----------|-------|-------------|----------|------|------|----------------|---------------------|-------------|---|
| RH136H12-7-21168  |                   | 11       | 84-86 | Rps2-LRR    | -1       | 6017 | 6154 | E=1.71558e-05  |                     |             |   |
| RH136H12-7-21168  |                   | 11       | 84-86 | R3a-LRR     | -2       | 6101 | 6413 | E=8.72099e-104 |                     |             |   |
| RH144P01-7-64035  | AC240029          | 11       | 84-86 | I2-CC       | -2       | 7502 | 7524 | E=3.16018e-05  | RGH-SSR38           | 1           |   |
| RH144P01-7-64035  |                   | 11       | 84-86 | I2-CC       | -3       | 7547 | 7696 | E=1.31241e-43  |                     |             |   |
| RH144P01-7-64035  |                   | 11       | 84-86 | R3a-NBS     | -3       | 7699 | 8085 | E=1.86869e-158 |                     |             |   |
| RH144P01-7-64035  |                   | 11       | 84-86 | R3a-LRR     | -1       | 8109 | 8180 | E=3.5926e-26   |                     |             |   |
| RH144P01-7-64035  |                   | 11       | 84-86 | R3a-LRR     | -3       | 8165 | 8672 | E=1.32264e-163 |                     |             |   |
| RH166M24-11-10204 | AC240044          | 11       | 84-86 | I2-CC       | -3       | 229  | 389  | E=2.17255e-60  | RGH-SSR45           | 1           |   |
| RH166M24-11-10204 |                   | 11       | 84-86 | R3a-NBS     | -3       | 390  | 772  | E=8.00124e-178 |                     |             |   |
| RH166M24-11-10204 |                   | 11       | 84-86 | I2-LRR      | -3       | 773  | 1504 | E=0.0          |                     |             |   |
| RH166M24-12-10125 |                   | 11       | 84-86 | R3a-CC      | -1       | 343  | 509  | E=5.24867e-67  |                     | 1           |   |
| RH166M24-12-10125 |                   | 11       | 84-86 | I2-NBS      | -1       | 510  | 895  | E=0.0          |                     |             |   |
| RH166M24-12-10125 |                   | 11       | 84-86 | I2-LRR      | -1       | 896  | 1645 | E=0.0          |                     |             |   |
| RH166M24-13-11346 |                   | 11       | 84-86 | I2-CC       | 2        | 1451 | 1611 | E=1.76352e-60  |                     | 1           |   |
| RH166M24-13-11346 |                   | 11       | 84-86 | R3a-NBS     | 2        | 1612 | 1994 | E=1.14511e-178 |                     |             |   |
| RH166M24-13-11346 |                   | 11       | 84-86 | I2-LRR      | 2        | 1995 | 2722 | E=0.0          |                     |             |   |
| RH166M24-6-23818  |                   | 11       | 84-86 | I2-CC       | 3        | 2908 | 3068 | E=8.39218e-61  |                     | 1           |   |
| RH166M24-6-23818  |                   | 11       | 84-86 | R3a-NBS     | 3        | 3069 | 3451 | E=7.67208e-179 |                     |             |   |
| RH166M24-6-23818  |                   | 11       | 84-86 | R3a-LRR     | 3        | 3452 | 3787 | E=2.12083e-146 |                     |             |   |
| RH166M24-6-23818  |                   | 11       | 84-86 | R3a-LRR     | 1        | 3682 | 4078 | E=1.22881e-129 |                     |             |   |
| RH166M24-7-6949   |                   | 11       | 84-86 | R3a-CC      | -3       | 375  | 541  | E=5.47227e-67  |                     | 1           |   |
| RH166M24-7-6949   |                   | 11       | 84-86 | R3a-NBS     | -3       | 542  | 930  | E=0.0          |                     |             |   |
| RH166M24-7-6949   |                   | 11       | 84-86 | I2-LRR      | -3       | 931  | 1636 | E=0.0          |                     |             |   |
| RH166M24-9-4187   |                   | 11       | 84-86 | I2-CC       | -2       | 506  | 666  | E=6.01424e-59  |                     | 1           |   |
| RH166M24-9-4187   |                   | 11       | 84-86 | R3a-NBS     | -2       | 667  | 1049 | E=1.03721e-174 |                     |             |   |
| RH166M24-9-4187   |                   | 11       | 84-86 | R3a-LRR     | -2       | 1050 | 1353 | E=4.94316e-134 |                     |             |   |
| RH185F02-1-7051   | AC240055          | 11       | 84-86 | R3a-LRR     | 3        | 3    | 677  | E=5.86048e-180 | RGH-SSR47           | 1           |   |
| RH185F02-2-38126  |                   | 11       | 84-86 | I2-CC       | 2        | 7502 | 7524 | E=3.16018e-05  |                     | 1           |   |
| RH185F02-2-38126  |                   | 11       | 84-86 | I2-CC       | 3        | 7547 | 7696 | E=1.31241e-43  |                     |             |   |
| RH185F02-2-38126  |                   | 11       | 84-86 | R3a-NBS     | 3        | 7699 | 8085 | E=2.44059e-158 |                     |             |   |
| RH185F02-2-38126  |                   | 11       | 84-86 | R3a-LRR     | 1        | 8109 | 8180 | E=3.71453e-26  |                     |             |   |
| RH185F02-2-38126  |                   | 11       | 84-86 | R3a-LRR     | 3        | 8165 | 8672 | E=3.28412e-163 |                     |             |   |
| RH202M15-10-4842  | AC240071          | 11       | 84-86 | R3a-CC      | -3       | 246  | 412  | E=4.32715e-71  | NBS profiling       | 1           |   |
| RH202M15-10-4842  |                   | 11       | 84-86 | R3a-NBS     | -3       | 413  | 795  | E=7.76107e-168 |                     |             |   |
| RH202M15-10-4842  |                   | 11       | 84-86 | I2-LRR      | -3       | 796  | 1512 | E=0.0          |                     |             |   |
| RH202M15-16-5113  |                   | 11       | 84-86 | I2-CC       | -1       | 258  | 418  | E=1.4682e-59   |                     | 1           |   |
| RH202M15-16-5113  |                   | 11       | 84-86 | R3a-NBS     | -1       | 419  | 801  | E=4.57746e-176 |                     |             |   |
| RH202M15-16-5113  |                   | 11       | 84-86 | R3a-LRR     | -1       | 802  | 1137 | E=3.24666e-145 |                     |             |   |
| RH202M15-16-5113  |                   | 11       | 84-86 | I2-LRR      | -2       | 1048 | 1446 | E=1.44089e-127 |                     |             |   |
| RH202M15-22-3315  |                   | 11       | 84-86 | R3a-NBS     | 3        | 281  | 331  | E=4.75495e-16  |                     | 1           |   |
| RH202M15-22-3315  |                   | 11       | 84-86 | I2-NBS      | 1        | 331  | 427  | E=1.96161e-32  |                     |             |   |
| RH202M15-22-3315  |                   | 11       | 84-86 | R3a-LRR     | 1        | 428  | 499  | E=3.63849e-11  |                     |             |   |
| RH202M15-22-3315  |                   | 11       | 84-86 | R3a-LRR     | 3        | 460  | 537  | E=2.1379e-32   |                     |             |   |
| RH202M15-22-3315  |                   | 11       | 84-86 | I2-LRR      | 2        | 595  | 707  | E=2.29501e-18  |                     |             |   |
| RH202M15-24-2363  |                   | 11       | 84-86 | R3a-LRR     | -1       | 1    | 646  | E=0.0          |                     | 1           |   |
| RH202M15-26-10176 |                   | 11       | 84-86 | I2-CC       | -2       | 203  | 367  | E=2.5619e-67   |                     | 1           |   |
| RH202M15-26-10176 |                   | 11       | 84-86 | R3a-NBS     | -2       | 368  | 752  | E=0.0          |                     |             |   |
| RH202M15-26-10176 |                   | 11       | 84-86 | R3a-LRR     | -2       | 753  | 1101 | E=7.6963e-161  |                     |             |   |
| RH202M15-37-4302  |                   | 11       | 84-86 | R3a-LRR     | 2        | 900  | 938  | E=4.16297e-07  |                     | 1           |   |
| RH202M15-5-2681   |                   | 11       | 84-86 | R3a-NBS     | -2       | 419  | 796  | E=4.32403e-171 |                     | 1           |   |
| RH202M15-5-2681   |                   | 11       | 84-86 | I2-LRR      | -2       | 797  | 856  | E=7.01822e-19  |                     |             |   |
| RH099L23-14-3612  | AC240005          | 11       |       | R3a-CC      | 2        | 520  | 685  | E=1.74625e-64  | potato physical map | 1           |   |
| RH099L23-14-3612  |                   | 11       |       | I2-NBS      | 2        | 685  | 1070 | E=0.0          |                     |             |   |
| RH099L23-14-3612  |                   | 11       |       | I2-LRR      | 2        | 1071 | 1156 | E=1.22392e-28  |                     |             |   |
| RH099L23-17-4180  |                   | 11       |       | I2-LRR      | 3        | 1    | 414  | E=3.05855e-121 |                     | 1           |   |
| RH099L23-17-4180  |                   | 11       |       | Rpp1-b-LRR  | 3        | 1    | 402  | E=5.74493e-27  |                     |             |   |
| RH099L23-17-4180  |                   | 11       |       | I2-LRR      | 1        | 703  | 758  | E=2.47973e-10  |                     |             |   |
| RH099L23-21-4862  |                   | 11       |       | I2-CC       | 1        | 836  | 1002 | E=4.1268e-63   |                     | 1           |   |
| RH099L23-21-4862  |                   | 11       |       | I2-NBS      | 1        | 1003 | 1387 | E=0.0          |                     |             |   |
| RH099L23-21-4862  |                   | 11       |       | R3a-LRR     | 1        | 1388 | 1562 | E=7.63602e-73  |                     |             |   |
| RH099L23-22-5981  |                   | 11       |       | I2-NBS      | 3        | 34   | 90   | E=3.25216e-15  |                     | 1           |   |
| RH099L23-22-5981  |                   | 11       |       | R3a-LRR     | 1        | 52   | 669  | E=0.0          |                     |             |   |
| RH099L23-24-4006  |                   | 11       |       | I2-LRR      | 1        | 1    | 173  | E=3.17193e-53  |                     | 1           |   |
| RH099L23-26-6121  |                   | 11       |       | M-NBS       | 1        | 1320 | 1483 | E=0.0321292    |                     | 1           |   |
| RH099L23-28-894   |                   | 11       |       | R3a-CC      | 3        | 142  | 274  | E=9.59867e-57  |                     | 1           |   |
| RH099L23-30-7406  |                   | 11       |       | I2-CC       | 2        | 1    | 147  | E=5.18304e-54  |                     | 1           |   |
| RH099L23-30-7406  |                   | 11       |       | I2-NBS      | 2        | 148  | 532  | E=0.0          |                     |             |   |
| RH099L23-30-7406  |                   | 11       |       | I2-LRR      | 2        | 533  | 1248 | E=0.0          |                     |             |   |
| RH099L23-30-7406  |                   | 11       |       | I2-LRR      | 3        | 1472 | 1527 | E=2.45913e-10  |                     |             |   |
| RH099L23-4-5089   |                   | 11       |       | R3a-CC      | 3        | 187  | 353  | E=2.37714e-65  |                     | 1           |   |
| RH099L23-4-5089   |                   | 11       |       | I2-NBS      | 3        | 354  | 738  | E=0.0          |                     |             |   |
| RH099L23-4-5089   |                   | 11       |       | I2-LRR      | 3        | 739  | 1438 | E=0.0          |                     |             |   |
| RH101D04-10-19796 | AC240006          | 11       |       | R3a-CC      | 2        | 258  | 424  | E=2.18178e-73  | potato physical map | 1           |   |
| RH101D04-10-19796 |                   | 11       |       | I2-NBS      | 2        | 425  | 812  | E=0.0          |                     |             |   |
| RH101D04-10-19796 |                   | 11       |       | I2-LRR      | 2        | 813  | 1467 | E=0.0          |                     |             |   |
| RH101D04-10-19796 |                   | 11       |       | I2-LRR      | 3        | 3253 | 3297 | E=8.05086e-06  |                     |             |   |
| RH101D04-3-10545  |                   | 11       |       | R3a-NBS     | 2        | 1    | 276  | E=1.19293e-152 |                     | 1           |   |
| RH101D04-3-10545  |                   | 11       |       | I2-LRR      | 2        | 277  | 980  | E=0.0          |                     |             |   |
| RH101D04-6-21414  |                   | 11       |       | I2-CC       | 2        | 308  | 472  | E=7.95928e-71  |                     | 1           |   |
| RH101D04-6-21414  |                   | 11       |       | R3a-NBS     | 2        | 473  | 860  | E=0.0          |                     |             |   |
| RH101D04-6-21414  |                   | 11       |       | R3a-LRR     | 2        | 861  | 1012 | E=6.26661e-64  |                     |             |   |
| RH101D04-6-21414  |                   | 11       |       | Rpp5-TIR    | 2        | 1266 | 1345 | E=0.0393914    |                     | 1           |   |
| RH101D04-6-21414  |                   | 11       |       | R3a-LRR     | 1        | 2475 | 3038 | E=0.0          |                     |             |   |
| RH101D04-7-18378  |                   | 11       |       | Rpi-blb1-CC | 2        | 332  | 490  | E=2.69742e-07  |                     | 1           |   |
| RH101D04-7-18378  |                   | 11       |       | LR1-NBS     | 2        | 472  | 1158 | E=5.19996e-69  |                     |             |   |
| RH101D04-7-18378  |                   | 11       |       | I2-LRR      | 2        | 852  | 1556 | E=0.0          |                     |             |   |
| RH101D04-7-18378  |                   | 11       |       | R3a-CC      | 2        | 2897 | 3063 | E=5.12784e-61  |                     | 1           |   |
| RH101D04-7-18378  |                   | 11       |       | I2-NBS      | 2        | 3064 | 3452 | E=0.0          |                     |             |   |
| RH101D04-7-18378  |                   | 11       |       | Rp1D-LRR    | 2        | 3483 | 3709 | E=1.17384e-21  |                     |             |   |
| RH101D04-7-18378  |                   | 11       |       | Rpp1-LRR    | 2        | 3820 | 4115 | E=3.41925e-07  |                     |             |   |
| RH101D04-7-18378  |                   | 11       |       | I2-LRR      | 3        | 4406 | 4466 | E=2.81116e-09  |                     |             |   |
| RH156J02-2-5915   | AC240038          | 11       |       | R3a-LRR     | -1       | 1    | 384  | E=2.03135e-122 | RGH-SSR41 (SH)      | 1           |   |
| Xif-TNL           | RH036B12-10-14795 | AC239976 | 11    | 82-83       | Bs4-TIR  | -1   | 1298 | 1387           | E=2.70474e-31       | BACend tool | 1 |
|                   | RH036B12-10-14795 |          | 11    | 82-83       | Bs4-TIR  | -3   | 1366 | 1391           | E=0.00108906        |             |   |
|                   | RH036B12-10-14795 |          | 11    | 82-83       | Y-1-NBS  | -1   | 1547 | 1771           | E=2.98379e-57       |             |   |
|                   | RH036B12-10-14795 |          | 11    | 82-83       | Bs4-LRR  | -3   | 2423 | 2450           | E=0.0240863         |             |   |
|                   | RH036B12-10-14795 |          | 11    | 82-83       | N-NL-LRR | -1   | 2539 | 2744           | E=2.40909e-50       |             |   |
|                   | RH036B12-10-14795 |          | 11    | 82-83       | Y-1-LRR  | -2   | 2715 | 2943           | E=5.78103e-47       |             |   |

|                   |          |    |       |               |    |       |       |                |                                 |   |
|-------------------|----------|----|-------|---------------|----|-------|-------|----------------|---------------------------------|---|
| RH036B12-10-14795 |          | 11 | 82-83 | Bs4-CNL       | -2 | 2890  | 2982  | E=2.92584e-15  |                                 |   |
| RH036B12-10-14795 |          | 11 | 82-83 | N-Nt-CNL      | -1 | 2958  | 3076  | E=9.54235e-27  |                                 |   |
| RH036B12-6-4495   |          | 11 | 82-83 | Bs4-LRR       | -3 | 882   | 1018  | E=1.25239e-13  |                                 | 1 |
| RH036B12-6-4495   |          | 11 | 82-83 | Y-1-LRR       | -2 | 1017  | 1082  | E=1.48295e-20  |                                 |   |
| RH036B12-6-4495   |          | 11 | 82-83 | N-Nt-CNL      | -1 | 1083  | 1136  | E=8.2546e-09   |                                 |   |
| RH036B12-9-16273  |          | 11 | 82-83 | Bs4-LRR       | -1 | 2501  | 2552  | E=9.0557e-10   |                                 | 1 |
| RH036B12-9-16273  |          | 11 | 82-83 | Y-1-LRR       | -3 | 2556  | 2592  | E=0.00881259   |                                 |   |
| RH063B11-10-4302  |          | 11 | 82-83 | Bs4-TIR       | -3 | 1136  | 1225  | E=2.70474e-31  | NBS profiling                   | 1 |
| RH063B11-10-4302  |          | 11 | 82-83 | Bs4-TIR       | -2 | 1208  | 1233  | E=0.00108906   |                                 |   |
| RH063B11-10-4302  |          | 11 | 82-83 | N-Nt-NBS      | -1 | 1317  | 1347  | E=0.0238044    |                                 |   |
| RH063B11-17-9759  |          | 11 | 82-83 | Bs4-LRR       | -3 | 2526  | 2662  | E=1.24199e-13  |                                 | 1 |
| RH063B11-17-9759  |          | 11 | 82-83 | Y-1-LRR       | -2 | 2648  | 2713  | E=1.63912e-20  |                                 |   |
| RH063B11-17-9759  |          | 11 | 82-83 | N-Nt-CNL      | -1 | 2704  | 2757  | E=7.34455e-09  |                                 |   |
| RH063B11-3-8726   |          | 11 | 82-83 | Y-1-NBS       | -2 | 1     | 131   | E=4.46027e-23  |                                 | 1 |
| RH063B11-3-8726   |          | 11 | 82-83 | Bs4-NBS       | -1 | 131   | 185   | E=2.6258e-11   |                                 |   |
| RH063B11-3-8726   |          | 11 | 82-83 | Bs4-LRR       | -1 | 811   | 838   | E=0.0272976    |                                 |   |
| RH063B11-3-8726   |          | 11 | 82-83 | N-Nt-LRR      | -2 | 899   | 1104  | E=3.65625e-50  |                                 |   |
| RH063B11-3-8726   |          | 11 | 82-83 | Y-1-LRR       | -3 | 1098  | 1326  | E=5.97723e-47  |                                 |   |
| RH063B11-3-8726   |          | 11 | 82-83 | Bs4-CNL       | -3 | 1273  | 1365  | E=2.56019e-15  |                                 |   |
| RH063B11-3-8726   |          | 11 | 82-83 | N-Nt-CNL      | -2 | 1318  | 1436  | E=1.25671e-26  |                                 |   |
| RH063B11-5-10568  |          | 11 | 82-83 | Bs4-LRR       | -1 | 2451  | 2502  | E=8.83184e-10  |                                 | 1 |
| RH063B11-5-10568  |          | 11 | 82-83 | Y-1-LRR       | -3 | 2502  | 2538  | E=0.0084525    |                                 |   |
| RH196L18-1-21218  | AC240064 | 11 | 82-83 | Bs4-NBS       | 2  | 1     | 70    | E=2.49107e-20  | potato physical map/BACend tool | 1 |
| RH196L18-1-21218  |          | 11 | 82-83 | Bs4-LRR       | 3  | 238   | 289   | E=6.69446e-16  |                                 |   |
| RH196L18-1-21218  |          | 11 | 82-83 | N-Nt-LRR      | 1  | 327   | 739   | E=5.97274e-84  |                                 |   |
| RH196L18-1-21218  |          | 11 | 82-83 | N-Nt-CNL      | 1  | 740   | 897   | E=5.99913e-45  |                                 |   |
| RH196L18-1-21218  |          | 11 | 82-83 | N-Nt-CNL      | 2  | 6172  | 6223  | E=6.53672e-08  |                                 |   |
| RH196L18-14-1850  |          | 11 | 82-83 | Bs4-TIR       | -3 | 236   | 393   | E=2.93566e-65  |                                 | 1 |
| RH196L18-14-1850  |          | 11 | 82-83 | Y-1-NBS       | -1 | 456   | 572   | E=8.37034e-39  |                                 |   |
| RH196L18-6-6651   |          | 11 | 82-83 | Bs4-LRR       | -2 | 567   | 645   | E=5.85105e-20  |                                 | 1 |
| RH143D14-1-34165  | AC232094 | 11 |       | Bs4-TIR       | -1 | 6495  | 6650  | E=2.93311e-68  | BACend tool                     | 1 |
| RH143D14-1-34165  |          | 11 |       | Bs4-NBS       | -2 | 6750  | 6938  | E=2.5109e-79   |                                 |   |
| RH143D14-1-34165  |          | 11 |       | Bs4-NBS       | -1 | 6955  | 7046  | E=9.77032e-26  |                                 |   |
| RH143D14-1-34165  |          | 11 |       | Y-1-LRR       | -2 | 7167  | 7571  | E=8.22102e-70  |                                 |   |
| RH143D14-1-34165  |          | 11 |       | Bs4-CNL       | -3 | 7520  | 7666  | E=1.52132e-26  |                                 |   |
| RH143D14-3-50458  |          | 11 |       | Y-1-LRR       | -2 | 10240 | 10522 | E=1.44788e-45  |                                 | 1 |
| RH143D14-3-50458  |          | 11 |       | Bs4-LRR       | -1 | 10601 | 10633 | E=0.00994635   |                                 |   |
| RH143D14-3-50458  |          | 11 |       | Bs4-CNL       | -2 | 11833 | 11966 | E=2.86327e-32  |                                 |   |
| RH143D14-3-50458  |          | 11 |       | Bs4-TIR       | -2 | 14579 | 14610 | E=5.21844e-09  |                                 | 1 |
| XIIa-CNL          |          |    |       |               |    |       |       |                |                                 |   |
| RH139C15-13-13038 | AC240021 | 12 | 1-7   | R1-CC         | -3 | 239   | 334   | E=4.20217e-17  | RGH-CAPS9                       | 1 |
| RH139C15-13-13038 |          | 12 | 1-7   | R1-CC         | -2 | 1170  | 1325  | E=6.34255e-36  |                                 |   |
| RH139C15-7-14585  |          | 12 | 1-7   | R1-CC         | -2 | 534   | 1056  | E=7.85305e-105 |                                 | 1 |
| RH139C15-7-14585  |          | 12 | 1-7   | R1-NBS        | -2 | 1057  | 1269  | E=3.14344e-87  |                                 |   |
| RH139C15-7-14585  |          | 12 | 1-7   | R1-LRR        | -1 | 1331  | 1696  | E=4.09666e-63  |                                 |   |
| RH139C15-7-14585  |          | 12 | 1-7   | R1-CC         | -3 | 2573  | 2835  | E=2.77908e-33  |                                 | 1 |
| RH139C15-7-14585  |          | 12 | 1-7   | Rx1-NBS       | -2 | 3165  | 3469  | E=2.64491e-68  |                                 |   |
| RH139C15-7-14585  |          | 12 | 1-7   | R1-LRR        | -2 | 3375  | 3863  | E=1.24085e-96  |                                 |   |
| RH139C15-8-9533   |          | 12 | 1-7   | R1-CC         | -3 | 1311  | 1758  | E=1.10217e-86  |                                 | 1 |
| XIIb-CNL          |          |    |       |               |    |       |       |                |                                 |   |
| RH036D06-10-55277 | AC237996 | 12 | 46-51 | Xa1-NBS       | -3 | 2     | 344   | E=8.34912e-18  | NBS blast                       | 1 |
| RH036D06-10-55277 |          | 12 | 46-51 | Gpa2-LRR      | -3 | 256   | 594   | E=4.38412e-73  |                                 |   |
| RH036D06-10-55277 |          | 12 | 46-51 | Gpa2-CC       | -3 | 1914  | 1990  | E=0.00481943   |                                 | 1 |
| RH036D06-10-55277 |          | 12 | 46-51 | Gpa2-NBS      | -2 | 2324  | 2685  | E=8.77773e-149 |                                 |   |
| RH036D06-10-55277 |          | 12 | 46-51 | Rx1-LRR       | -2 | 2666  | 3099  | E=1.89896e-104 |                                 |   |
| RH036D06-10-55277 |          | 12 | 46-51 | Rx1-CC        | -2 | 3606  | 3772  | E=2.17196e-31  |                                 | 1 |
| RH036D06-10-55277 |          | 12 | 46-51 | Sw-5-NBS      | -2 | 3750  | 4123  | E=2.24922e-65  |                                 |   |
| RH036D06-10-55277 |          | 12 | 46-51 | Rx1-LRR       | -1 | 3997  | 4316  | E=7.35497e-67  |                                 |   |
| RH036D06-10-55277 |          | 12 | 46-51 | Gpa2-CC       | -1 | 6317  | 6339  | E=0.769434     |                                 | 1 |
| RH036D06-10-55277 |          | 12 | 46-51 | Rx1-CC        | -3 | 6506  | 6582  | E=4.99446e-08  |                                 |   |
| RH036D06-10-55277 |          | 12 | 46-51 | Gpa2-NBS      | -3 | 6556  | 6847  | E=1.46245e-114 |                                 |   |
| RH036D06-10-55277 |          | 12 | 46-51 | Tm2-LRR       | -1 | 6746  | 6798  | E=0.00330231   |                                 |   |
| RH036D06-10-55277 |          | 12 | 46-51 | Rps2-LRR      | -3 | 8418  | 8533  | E=0.0206304    |                                 |   |
| RH036D06-10-55277 |          | 12 | 46-51 | Rpp1-LRR      | 2  | 8501  | 8718  | E=1.56066e-07  |                                 |   |
| RH036D06-7-5974   |          | 12 | 46-51 | Rx1-CC        | 2  | 520   | 738   | E=3.16167e-31  |                                 | 1 |
| RH036D06-7-5974   |          | 12 | 46-51 | Gpa2-NBS      | 2  | 710   | 1068  | E=2.92631e-139 |                                 |   |
| RH036D06-7-5974   |          | 12 | 46-51 | Rx1-LRR       | 2  | 1052  | 1438  | E=2.96728e-61  |                                 |   |
| RH036D06-7-5974   |          | 12 | 46-51 | Gpa2-LRR      | 3  | 1327  | 1522  | E=1.38707e-42  |                                 |   |
| RH036D06-9-5650   |          | 12 | 46-51 | Rx1-CC        | -1 | 1453  | 1671  | E=1.05979e-31  |                                 | 1 |
| RH036D06-9-5650   |          | 12 | 46-51 | Gpa2-NBS      | -1 | 1643  | 1788  | E=2.78395e-52  |                                 |   |
| RH135M18-1-6128   | AC237865 | 12 | 46-51 | Rx1-CC        | 1  | 524   | 742   | E=3.24181e-31  | BACend tool                     | 1 |
| RH135M18-1-6128   |          | 12 | 46-51 | Gpa2-NBS      | 1  | 714   | 1072  | E=2.02712e-139 |                                 |   |
| RH135M18-1-6128   |          | 12 | 46-51 | Rx1-LRR       | 1  | 1056  | 1442  | E=3.33496e-61  |                                 |   |
| RH135M18-1-6128   |          | 12 | 46-51 | Gpa2-LRR      | 2  | 1331  | 1526  | E=2.17658e-42  |                                 |   |
| RH135M18-5-33417  |          | 12 | 46-51 | Rx1-CC        | 1  | 1437  | 1655  | E=1.025e-31    |                                 | 1 |
| RH135M18-5-33417  |          | 12 | 46-51 | Gpa2-NBS      | 1  | 1627  | 1985  | E=1.26971e-141 |                                 |   |
| RH135M18-5-33417  |          | 12 | 46-51 | Gpa2-LRR      | 1  | 2039  | 2377  | E=3.3568e-73   |                                 |   |
| RH135M18-5-33417  |          | 12 | 46-51 | Gpa2-NBS      | 3  | 4049  | 4410  | E=1.24616e-148 |                                 | 1 |
| RH135M18-5-33417  |          | 12 | 46-51 | Rx1-LRR       | 3  | 4391  | 4824  | E=1.89896e-104 |                                 |   |
| RH135M18-5-33417  |          | 12 | 46-51 | Rx1-CC        | 3  | 5331  | 5497  | E=2.17196e-31  |                                 | 1 |
| RH135M18-5-33417  |          | 12 | 46-51 | Sw-5-NBS      | 3  | 5475  | 5848  | E=2.74789e-65  |                                 |   |
| RH135M18-5-33417  |          | 12 | 46-51 | Rx1-LRR       | 2  | 5751  | 6070  | E=1.00151e-66  |                                 |   |
| RH135M18-5-33417  |          | 12 | 46-51 | Gpa2-CC       | 2  | 8071  | 8093  | E=0.725782     |                                 | 1 |
| RH135M18-5-33417  |          | 12 | 46-51 | Gpa2-NBS      | 2  | 8471  | 8557  | E=6.68414e-24  |                                 |   |
| RH005A19-2-18388  | AC237914 | 12 | 46-51 | Rx1-CC        | 3  | 3719  | 3751  | E=8.03594e-08  | RGH-SSR2 (SH)                   | 1 |
| RH005A19-2-18388  |          | 12 | 46-51 | Gpa2-LRR      | 1  | 3827  | 3874  | E=1.28793e-10  |                                 |   |
| RH005A19-5-31243  |          | 12 | 46-51 | Rx1-CC        | 3  | 7567  | 7737  | E=6.50556e-46  |                                 | 1 |
| RH005A19-5-31243  |          | 12 | 46-51 | Gpa2-NBS      | 3  | 7709  | 8061  | E=2.01132e-166 |                                 |   |
| RH005A19-5-31243  |          | 12 | 46-51 | Rx1-LRR       | 3  | 8042  | 8428  | E=2.74926e-94  |                                 |   |
| RH005A19-6-31339  |          | 12 | 46-51 | Bs2-firsthalf | -2 | 3975  | 4463  | E=0.0          |                                 | 1 |
| RH005A19-6-31339  |          | 12 | 46-51 | Bs2-LRR       | -1 | 4493  | 4668  | E=4.22057e-32  |                                 |   |
| RH005A19-6-31339  |          | 12 | 46-51 | Hero-LRR      | -2 | 4776  | 4913  | E=1.04892e-09  |                                 |   |
| RH005A19-6-31339  |          | 12 | 46-51 | Rx1-CC        | -2 | 6827  | 7006  | E=1.6756e-05   |                                 | 1 |
| RH005A19-6-31339  |          | 12 | 46-51 | Gpa2-NBS      | -2 | 6979  | 7329  | E=9.13428e-98  |                                 |   |
| RH005A19-6-31339  |          | 12 | 46-51 | Bs2-LRR       | -2 | 7365  | 7719  | E=3.67153e-81  |                                 |   |
| RH163C24-2-67408  | AC238314 | 12 | 46-51 | Gpa2-NBS      | 1  | 15674 | 16025 | E=3.00551e-162 | potato physical map/BACend tool | 1 |
| RH163C24-2-67408  |          | 12 | 46-51 | Rx1-LRR       | 1  | 16006 | 16397 | E=4.06465e-98  |                                 |   |
| RH163C24-2-67408  |          | 12 | 46-51 | Gpa2-CC       | 2  | 18887 | 18932 | E=2.30598e-13  |                                 | 1 |
| RH163C24-2-67408  |          | 12 | 46-51 | Gpa2-LRR      | 3  | 19015 | 19106 | E=7.14861e-27  |                                 |   |
| RH163C24-4-33809  |          | 12 | 46-51 | Bs2-firsthalf | -3 | 3843  | 4012  | E=1.27011e-41  |                                 | 1 |

|          |                   |          |    |       |               |    |       |       |                |                                 |   |
|----------|-------------------|----------|----|-------|---------------|----|-------|-------|----------------|---------------------------------|---|
|          | RH163C24-4-33809  |          | 12 | 46-51 | Mi-1-LRR      | -1 | 4017  | 4222  | E=3.01819e-16  |                                 |   |
|          | RH163C24-4-33809  |          | 12 | 46-51 | Bs2-firsthalf | -1 | 4965  | 5457  | E=2.18407e-157 |                                 | 1 |
|          | RH163C24-4-33809  |          | 12 | 46-51 | Bs2-LRR       | -1 | 5503  | 5857  | E=2.83475e-81  |                                 |   |
|          | RH153N17-4-48875  | AC238291 | 12 | 46-51 | Rx1-CC        | -2 | 4468  | 4634  | E=3.61695e-85  | potato physical map/BACend tool | 1 |
|          | RH153N17-4-48875  |          | 12 | 46-51 | Gpa2-NBS      | -2 | 4606  | 4959  | E=0.0          |                                 |   |
|          | RH153N17-4-48875  |          | 12 | 46-51 | Gpa2-LRR      | -2 | 4960  | 5331  | E=1.06085e-161 |                                 |   |
|          | RH153N17-7-8320   |          | 12 | 46-51 | Rx1-CC        | -3 | 997   | 1163  | E=2.08718e-82  |                                 | 1 |
|          | RH153N17-7-8320   |          | 12 | 46-51 | Gpa2-NBS      | -3 | 1135  | 1488  | E=0.0          |                                 |   |
|          | RH153N17-7-8320   |          | 12 | 46-51 | Rx1-LRR       | -3 | 1469  | 1889  | E=0.0          |                                 |   |
|          | RH192P22-2-18934  | AC238387 | 12 | 46-51 | Rx1-CC        | -1 | 4843  | 5009  | E=4.00017e-83  | RGH-SSR48 (SH)                  | 1 |
|          | RH192P22-2-18934  |          | 12 | 46-51 | Gpa2-NBS      | -1 | 4981  | 5051  | E=3.3077e-33   |                                 |   |
|          | RH192P22-2-18934  |          | 12 | 46-51 | Gpa2-NBS      | -2 | 5145  | 5428  | E=2.96178e-155 |                                 |   |
|          | RH192P22-2-18934  |          | 12 | 46-51 | Rx1-LRR       | -2 | 5409  | 5834  | E=0.0          |                                 |   |
|          | RH192P22-3-19859  |          | 12 | 46-51 | Gpa2-CC       | -2 | 363   | 391   | E=6.88543e-10  |                                 | 1 |
|          | RH192P22-6-6024   |          | 12 | 46-51 | Rx1-CC        | -2 | 1067  | 1233  | E=2.44644e-81  |                                 | 1 |
|          | RH192P22-6-6024   |          | 12 | 46-51 | Gpa2-NBS      | -2 | 1205  | 1558  | E=0.0          |                                 |   |
|          | RH192P22-6-6024   |          | 12 | 46-51 | Gpa2-LRR      | -2 | 1559  | 1943  | E=5.35044e-163 |                                 |   |
| Xilc-TNL | RH192G12-1-26265  | AC238386 | 12 |       | Bs4-TIR       | -3 | 5574  | 5733  | E=1.68669e-77  | marker blast (T1263)            | 1 |
|          | RH192G12-1-26265  |          | 12 |       | Bs4-NBS       | -3 | 5774  | 6131  | E=1.63193e-155 |                                 |   |
|          | RH192G12-1-26265  |          | 12 |       | N-Nt-LRR      | -1 | 6355  | 6452  | E=4.66557e-15  |                                 |   |
|          | RH192G12-1-26265  |          | 12 |       | N-Nt-LRR      | -3 | 6453  | 6738  | E=5.65808e-98  |                                 |   |
|          | RH192G12-1-26265  |          | 12 |       | N-Nt-CNL      | -3 | 6860  | 7047  | E=5.3934e-38   |                                 |   |
| no lg    | RH025O01-5-38763  | AC237832 |    |       | Bs4-TIR       | 2  | 8285  | 8443  | E=7.78338e-69  |                                 | 1 |
|          | RH025O01-5-38763  |          |    |       | Bs4-NBS       | 2  | 8500  | 8867  | E=2.67689e-146 |                                 |   |
|          | RH025O01-5-38763  |          |    |       | N-Nt-LRR      | 3  | 8976  | 9077  | E=1.92663e-15  |                                 |   |
|          | RH025O01-5-38763  |          |    |       | Y-1-LRR       | 2  | 9279  | 9669  | E=8.88731e-89  |                                 |   |
|          | RH025O01-5-38763  |          |    |       | N-Nt-CNL      | 2  | 9611  | 9762  | E=1.85261e-40  |                                 |   |
|          | RH055N16-2-33873  | AC237840 |    |       | Rpi-blb2-LRR  | -3 | 851   | 911   | E=3.45225e-13  |                                 | 1 |
|          | RH055N16-2-33873  |          |    |       | CaMi-CC       | -3 | 4914  | 5268  | E=4.4227e-135  |                                 | 1 |
|          | RH055N16-2-33873  |          |    |       | Rpi-blb2-NBS  | -3 | 5259  | 5609  | E=6.51589e-155 |                                 |   |
|          | RH055N16-2-33873  |          |    |       | Rpi-blb2-LRR  | -2 | 5468  | 5740  | E=1.59498e-115 |                                 |   |
|          | RH055N16-2-33873  |          |    |       | Mi-1-LRR      | -1 | 7137  | 7320  | E=1.37783e-73  |                                 |   |
|          | RH055N16-3-46067  |          |    |       | Rpi-blb2-NBS  | -3 | 4556  | 4607  | E=4.38823e-22  |                                 | 1 |
|          | RH055N16-3-46067  |          |    |       | Rpi-blb2-NBS  | -2 | 4591  | 4916  | E=3.78408e-130 |                                 |   |
|          | RH055N16-3-46067  |          |    |       | Mi-1-LRR      | -2 | 4917  | 5276  | E=6.30226e-153 |                                 |   |
|          | RH055N16-3-46067  |          |    |       | Rpi-blb2-CC   | -3 | 13930 | 14429 | E=0.0          |                                 | 1 |
|          | RH069O02-1-71837  | AC237848 |    |       | Rpi-blb2-NBS  | 2  | 6495  | 6820  | E=3.75264e-130 |                                 | 1 |
|          | RH069O02-1-71837  |          |    |       | Mi-1-LRR      | 2  | 6821  | 7180  | E=4.29347e-153 |                                 |   |
|          | RH069O02-1-71837  |          |    |       | CaMi-CC       | 3  | 15817 | 16384 | E=0.0          |                                 | 1 |
|          | RH069O02-1-71837  |          |    |       | Rpi-blb2-NBS  | 3  | 16375 | 16722 | E=1.55494e-147 |                                 |   |
|          | RH069O02-1-71837  |          |    |       | Rpi-blb2-LRR  | 3  | 16723 | 16891 | E=9.23658e-72  |                                 |   |
|          | RH069O02-1-71837  |          |    |       | Rpi-blb2-CC   | 1  | 17835 | 18142 | E=1.81286e-103 |                                 | 1 |
|          | RH069O02-1-71837  |          |    |       | Rpi-blb2-CC   | 2  | 18261 | 18696 | E=0.0          |                                 |   |
|          | RH069O02-1-71837  |          |    |       | Rpi-blb2-NBS  | 1  | 18719 | 18872 | E=1.81304e-49  |                                 |   |
|          | RH069O02-1-71837  |          |    |       | Hero-LRR      | 3  | 18966 | 19120 | E=2.33473e-12  |                                 |   |
|          | RH069O02-1-71837  |          |    |       | Mi-1-LRR      | 1  | 19039 | 19202 | E=1.65881e-66  |                                 |   |
|          | RH069O02-2-34265  |          |    |       | Rpi-blb2-CC   | 3  | 1901  | 2083  | E=1.70291e-31  |                                 | 1 |
|          | RH069O02-2-34265  |          |    |       | Rpi-blb2-NBS  | 1  | 2064  | 2182  | E=1.0096e-25   |                                 |   |
|          | RH069O02-2-34265  |          |    |       | Rpi-blb2-LRR  | 1  | 2183  | 2365  | E=1.22913e-64  |                                 |   |
|          | RH069O02-2-34265  |          |    |       | Mi-1-LRR      | 3  | 2345  | 2521  | E=6.42814e-56  |                                 |   |
|          | RH069O02-2-34265  |          |    |       | CaMi-CC       | 2  | 5383  | 5929  | E=0.0          |                                 | 1 |
|          | RH069O02-2-34265  |          |    |       | Rpi-blb2-NBS  | 2  | 5920  | 6270  | E=2.27453e-159 |                                 |   |
|          | RH069O02-2-34265  |          |    |       | Mi-1-LRR      | 2  | 6272  | 6633  | E=8.74379e-146 |                                 |   |
|          | RH090J20-1-54900  | AC237853 |    |       | Sw-5-CC       | -3 | 3252  | 3793  | E=0.0          |                                 | 1 |
|          | RH090J20-1-54900  |          |    |       | Sw-5-NBS      | -3 | 3795  | 4164  | E=1.53502e-174 |                                 |   |
|          | RH090J20-1-54900  |          |    |       | Sw-5-LRR      | -3 | 4165  | 4508  | E=2.94982e-82  |                                 |   |
|          | RH105D06-3-72747  | AC237857 |    |       | Rps5-NBS      | 2  | 15656 | 15808 | E=3.76734e-18  |                                 | 1 |
|          | RH106C02-22-1945  | AC240009 |    |       | R3a-LRR       | -3 | 8     | 331   | E=4.09712e-62  |                                 | 1 |
|          | RH106C02-8-2220   |          |    |       | I2-CC         | 3  | 68    | 101   | E=1.97769e-10  |                                 | 1 |
|          | RH106C02-8-2220   |          |    |       | R3a-CC        | 3  | 68    | 105   | E=1.8483e-12   |                                 |   |
|          | RH106C02-8-2220   |          |    |       | I2-CC         | 1  | 101   | 215   | E=4.43603e-44  |                                 |   |
|          | RH106C02-8-2220   |          |    |       | R3a-NBS       | 1  | 216   | 406   | E=3.47034e-95  |                                 |   |
|          | RH106C02-8-2220   |          |    |       | R3a-NBS       | 2  | 371   | 586   | E=8.89898e-99  |                                 |   |
|          | RH106C02-8-2220   |          |    |       | R3a-LRR       | 2  | 587   | 704   | E=7.03131e-41  |                                 |   |
|          | RH120B09-2-28356  | AC237859 |    |       | Rx2-CC        | 1  | 4879  | 4965  | E=7.03371e-07  |                                 | 1 |
|          | RH120B09-2-28356  |          |    |       | Rx2-CC        | 2  | 4926  | 4973  | E=6.04757e-10  |                                 |   |
|          | RH120B09-2-28356  |          |    |       | Gpa2-NBS      | 2  | 5061  | 5118  | E=2.03529e-10  |                                 |   |
|          | RH123J08-4-14604  | AC236625 |    |       | Gro1-4-TIR    | -3 | 3780  | 3945  | E=2.20094e-95  |                                 | 1 |
|          | RH123J08-4-14604  |          |    |       | Gro1-4-NBS    | -3 | 4112  | 4509  | E=1.01279e-177 |                                 |   |
|          | RH123J08-7-57902  |          |    |       | Gro1-4-NBS    | 2  | 3645  | 4081  | E=0.0          |                                 | 1 |
|          | RH123J08-7-57902  |          |    |       | Gro1-4-LRR    | 2  | 4082  | 4647  | E=0.0          |                                 |   |
|          | RH125J07-12-12157 | AC240013 |    |       | I2-CC         | 2  | 2472  | 2636  | E=2.13412e-64  |                                 | 1 |
|          | RH125J07-12-12157 |          |    |       | I2-NBS        | 2  | 2639  | 3016  | E=1.89784e-146 |                                 |   |
|          | RH125J07-12-12157 |          |    |       | I2-LRR        | 2  | 3017  | 3732  | E=0.0          |                                 |   |
|          | RH127M01-1-79879  | AC237861 |    |       | CaMi-CC       | -3 | 17042 | 17286 | E=4.63314e-61  |                                 | 1 |
|          | RH127M01-1-79879  |          |    |       | Rpi-blb2-CC   | -2 | 17319 | 17570 | E=6.64964e-81  |                                 |   |
|          | RH127M01-1-79879  |          |    |       | Rpi-blb2-NBS  | -1 | 17462 | 17674 | E=2.05344e-80  |                                 |   |
|          | RH127M01-1-79879  |          |    |       | Rpi-blb2-NBS  | -3 | 17715 | 17816 | E=3.85184e-40  |                                 |   |
|          | RH127M01-1-79879  |          |    |       | Mi-1-LRR      | -3 | 17818 | 18166 | E=1.76181e-146 |                                 |   |
|          | RH127M01-1-79879  |          |    |       | Mi-1-LRR      | -2 | 18917 | 18971 | E=3.78081e-16  |                                 |   |
|          | RH130M06-1-42126  | AC237862 |    |       | Rx2-CC        | -1 | 2766  | 2930  | E=2.18889e-33  |                                 | 1 |
|          | RH130M06-1-42126  |          |    |       | Gpa2-NBS      | -1 | 2902  | 3261  | E=3.68145e-153 |                                 |   |
|          | RH130M06-1-42126  |          |    |       | Gpa2-LRR      | -2 | 3618  | 3846  | E=1.57018e-46  |                                 |   |
|          | RH130M06-1-42126  |          |    |       | Gpa2-LRR      | -3 | 3824  | 3951  | E=3.71269e-42  |                                 |   |
|          | RH130M06-1-42126  |          |    |       | Rx2-LRR       | 2  | 7852  | 8054  | E=2.95117e-51  |                                 |   |
|          | RH130M06-1-42126  |          |    |       | Rx2-NBS       | 3  | 11309 | 11331 | E=0.00292976   |                                 | 1 |
|          | RH130M06-1-42126  |          |    |       | Gpa2-CC       | 2  | 11400 | 11466 | E=1.57006e-15  |                                 | 1 |
|          | RH130M06-1-42126  |          |    |       | Rx2-NBS       | 1  | 11452 | 11496 | E=0.000102359  |                                 |   |
|          | RH133D07-1-36922  |          |    |       | Dm3-LRR       | 1  | 10809 | 10974 | E=3.7752e-07   |                                 |   |
|          | RH137K16-1-31661  | AC237866 |    |       | Rx2-CC        | -3 | 9586  | 9752  | E=3.86999e-82  |                                 | 1 |
|          | RH137K16-1-31661  |          |    |       | Gpa2-NBS      | -3 | 9724  | 9817  | E=6.21459e-45  |                                 |   |
|          | RH137K16-2-16656  |          |    |       | Gpa2-LRR      | -1 | 1     | 385   | E=5.90361e-169 |                                 |   |
|          | RH137K16-2-16656  |          |    |       | Bs2-LRR       | -3 | 696   | 835   | E=2.79061e-20  |                                 |   |
|          | RH137K16-2-16656  |          |    |       | Rx2-CC        | -1 | 1343  | 1512  | E=1.07046e-54  |                                 | 1 |
|          | RH137K16-2-16656  |          |    |       | Gpa2-NBS      | -1 | 1484  | 1841  | E=4.96267e-159 |                                 |   |
|          | RH137K16-2-16656  |          |    |       | R1-LRR        | -1 | 1727  | 2227  | E=1.32744e-36  |                                 |   |
|          | RH137K16-2-16656  |          |    |       | Rx2-CC        | -3 | 4572  | 4738  | E=7.86538e-82  |                                 | 1 |
|          | RH137K16-2-16656  |          |    |       | Gpa2-NBS      | -3 | 4710  | 5063  | E=0.0          |                                 |   |

|                   |          |              |    |       |       |                |   |
|-------------------|----------|--------------|----|-------|-------|----------------|---|
| RH137K16-2-16656  |          | Rx2-LRR      | -3 | 5044  | 5302  | E=7.30986e-117 |   |
| RH137K16-3-2037   |          | Gpa2-LRR     | -3 | 534   | 643   | E=3.0644e-42   |   |
| RH141A04-1-38590  | AC232092 | Rx2-LRR      | -2 | 1803  | 2005  | E=3.12867e-51  | 1 |
| RH141A04-1-38590  |          | Rx2-NBS      | -1 | 5216  | 5238  | E=0.00281005   | 1 |
| RH141A04-1-38590  |          | Gpa2-CC      | -3 | 5344  | 5410  | E=1.33988e-15  | 1 |
| RH141A04-1-38590  |          | Rx2-NBS      | -2 | 5417  | 5461  | E=9.49541e-05  |   |
| RH141A04-1-38590  |          | Rx2-CC       | 1  | 7691  | 7855  | E=2.18889e-33  | 1 |
| RH141A04-1-38590  |          | Gpa2-NBS     | 1  | 7827  | 8186  | E=3.68145e-153 |   |
| RH141A04-1-38590  |          | R1-LRR       | 1  | 8072  | 8189  | E=1.24894e-16  |   |
| RH141A04-1-38590  |          | Gpa2-LRR     | 2  | 8578  | 8806  | E=1.79444e-46  |   |
| RH141A04-1-38590  |          | Gpa2-LRR     | 3  | 8720  | 8847  | E=3.71269e-42  |   |
| RH145B06-3-64546  | AC240124 | Sw-5-LRR     | -1 | 4473  | 4775  | E=9.0553e-41   | 1 |
| RH145B06-3-64546  |          | Sw-5-CC      | 1  | 10952 | 11018 | E=0.000412409  | 1 |
| RH145B06-3-64546  |          | Sw-5-CC      | 3  | 11017 | 11115 | E=1.02016e-16  |   |
| RH148B08-1-1415   | AC238273 | R3a-NBS      | -2 | 1     | 161   | E=6.23824e-58  | 1 |
| RH148B08-1-1415   |          | R3a-LRR      | -2 | 162   | 471   | E=9.2664e-125  |   |
| RH148B08-3-47461  |          | R3a-CC       | -1 | 5355  | 5393  | E=8.03128e-10  | 1 |
| RH148B08-3-47461  |          | I2-CC        | -2 | 13015 | 13177 | E=1.23616e-48  |   |
| RH148B08-3-47461  |          | R3a-NBS      | -2 | 13178 | 13561 | E=5.49853e-148 |   |
| RH148B08-3-47461  |          | R3a-LRR      | -2 | 13562 | 14041 | E=1.10339e-155 |   |
| RH148B08-5-4294   |          | I2-LRR       | -1 | 1     | 274   | E=1.97586e-74  | 1 |
| RH148B08-5-4294   |          | I2-CC        | -3 | 622   | 714   | E=8.27539e-23  | 1 |
| RH148B08-7-2418   |          | I2-CC        | -3 | 509   | 675   | E=5.36361e-51  |   |
| RH148B08-7-2418   |          | R3a-NBS      | -3 | 676   | 755   | E=1.50945e-31  |   |
| RH148D21-3-111482 | AC237872 | Y-1-LRR      | 2  | 4581  | 4670  | E=3.31807e-05  | 1 |
| RH150H11-1-16301  | AC240032 | Dm3-NBS      | 3  | 2562  | 2875  | E=4.07543e-46  | 1 |
| RH150H11-1-16301  |          | Rpm1-LRR     | 3  | 2948  | 3065  | E=0.00209216   |   |
| RH150H11-1-16301  |          | Dm3-LRR      | 3  | 3418  | 3535  | E=1.63899e-07  |   |
| RH150H11-1-16301  |          | Dm3-LRR      | -2 | 4697  | 5016  | E=3.93603e-07  |   |
| RH150H11-10-7691  |          | Dm3-LRR      | 1  | 1511  | 1612  | E=4.38698e-07  | 1 |
| RH150H11-2-4845   |          | Dm3-LRR      | -1 | 177   | 278   | E=6.82881e-06  | 1 |
| RH150H11-3-7336   |          | Dm3-LRR      | -3 | 1708  | 1827  | E=6.33479e-06  | 1 |
| RH150H11-3-7336   |          | Rps2-LRR     | -2 | 1842  | 2010  | E=5.89465e-07  |   |
| RH150H11-7-18936  |          | Rps2-LRR     | 3  | 349   | 443   | E=0.0116005    | 1 |
| RH150H11-7-18936  |          | Dm3-LRR      | 1  | 510   | 655   | E=3.35705e-09  |   |
| RH165K04-1-32230  | AC232110 | Sw-5-NBS     | -2 | 2     | 268   | E=1.49814e-114 | 1 |
| RH165K04-1-32230  |          | Sw-5-LRR     | -3 | 319   | 610   | E=2.00668e-87  |   |
| RH165K04-1-32230  |          | Sw-5-CC      | -1 | 4430  | 4971  | E=0.0          | 1 |
| RH165K04-1-32230  |          | Rpi-blb2-NBS | -1 | 4988  | 5328  | E=1.46318e-69  |   |
| RH165K04-1-32230  |          | Sw-5-LRR     | -1 | 5343  | 5668  | E=3.47141e-96  |   |
| RH165K04-1-32230  |          | CaMi-CC      | -1 | 9365  | 9753  | E=1.03702e-15  | 1 |
| RH165K04-1-32230  |          | Sw-5-NBS     | -1 | 9729  | 10098 | E=2.23449e-174 |   |
| RH165K04-2-12366  |          | Lr10-NBS     | -3 | 2     | 82    | E=8.74821e-10  | 1 |
| RH165K04-2-12366  |          | Sw-5-LRR     | -3 | 126   | 452   | E=4.27535e-97  |   |
| RH165K04-2-12366  |          | Sw-5-CC      | -1 | 3107  | 3642  | E=0.0          | 1 |
| RH165K04-2-12366  |          | Sw-5-NBS     | -1 | 3644  | 3761  | E=1.2282e-51   |   |
| RH165K04-2-12366  |          | Sw-5-NBS     | -3 | 3749  | 3895  | E=2.17224e-70  |   |
| RH174E07-2-5093   | AC232116 | R3a-NBS      | 2  | 1     | 154   | E=1.7433e-81   | 1 |
| RH174E07-2-5093   |          | PM3b-LRR     | 2  | 206   | 285   | E=2.77263e-10  |   |
| RH174E07-2-5093   |          | R3a-LRR      | 2  | 1462  | 1615  | E=9.17726e-72  |   |
| RH174E07-4-11261  |          | R3a-LRR      | -2 | 741   | 972   | E=1.34476e-77  | 1 |
| RH174E07-5-11656  |          | I2-CC        | -1 | 901   | 1067  | E=9.18289e-67  | 1 |
| RH174E07-5-11656  |          | I2-NBS       | -1 | 1068  | 1454  | E=0.0          |   |
| RH174E07-5-11656  |          | I2-LRR       | -1 | 1455  | 2139  | E=0.0          |   |
| RH174E07-6-22517  |          | R3a-CC       | 2  | 950   | 1109  | E=4.3049e-60   | 1 |
| RH174E07-6-22517  |          | R3a-NBS      | 2  | 1110  | 1491  | E=1.47167e-176 |   |
| RH174E07-6-22517  |          | I2-LRR       | 2  | 1492  | 2203  | E=0.0          |   |
| RH174E07-6-22517  |          | R3a-CC       | 1  | 4884  | 5011  | E=4.20579e-54  | 1 |
| RH174E07-6-22517  |          | R3a-NBS      | 1  | 6192  | 6540  | E=0.0          |   |
| RH174E07-6-22517  |          | R3a-LRR      | 1  | 6542  | 6738  | E=2.34855e-82  |   |
| RH174E07-7-37242  |          | R3a-LRR      | -1 | 6863  | 6949  | E=5.62933e-31  | 1 |
| RH174E07-7-37242  |          | I2-LRR       | -2 | 7045  | 7123  | E=2.50906e-27  |   |
| RH174E07-7-37242  |          | R3a-CC       | -2 | 7928  | 8094  | E=8.14411e-77  | 1 |
| RH174E07-7-37242  |          | R3a-NBS      | -2 | 8095  | 8212  | E=8.14503e-59  |   |
| RH174E07-7-37242  |          | R3a-NBS      | -1 | 8101  | 8227  | E=5.31906e-61  |   |
| RH174E07-7-37242  |          | R3a-NBS      | -3 | 8167  | 8273  | E=2.16767e-49  |   |
| RH174E07-7-37242  |          | I2-LRR       | -3 | 8274  | 8694  | E=3.17113e-169 |   |
| RH174E07-8-2036   |          | R3a-LRR      | -2 | 593   | 646   | E=1.71361e-18  | 1 |
| RH174K15-1-31065  |          | Bs4-LRR      | 3  | 3934  | 4037  | E=4.56595e-12  | 1 |
| RH174K15-1-31065  |          | N-Nt-NBS     | -3 | 6738  | 6782  | E=1.26039e-08  |   |
| RH174K15-1-31065  |          | Bs4-NBS      | -2 | 6800  | 7179  | E=2.43114e-104 |   |
| RH174K15-1-31065  |          | Y-1-LRR      | -2 | 7199  | 7618  | E=9.03948e-88  |   |
| RH174K15-1-31065  |          | N-Nt-CNl     | -2 | 7574  | 7696  | E=8.316e-41    |   |
| RH175H08-4-28454  | AC240050 | I2-LRR       | -3 | 2     | 438   | E=1.65242e-115 | 1 |
| RH175H08-6-12128  |          | I2-CC        | 3  | 3339  | 3496  | E=2.00038e-57  | 1 |
| RH175H08-6-12128  |          | R3a-NBS      | 3  | 3497  | 3791  | E=1.35827e-136 |   |
| RH177I17-3-6997   | AC237883 | N-Nt-LRR     | -3 | 346   | 557   | E=4.63964e-63  | 1 |
| RH177I17-3-6997   |          | Y-1-LRR      | -2 | 558   | 831   | E=2.49256e-42  |   |
| RH177I17-3-6997   |          | N-Nt-CNl     | -1 | 789   | 951   | E=4.93757e-26  |   |
| RH177I17-5-37144  |          | Y-1-TIR      | 1  | 1017  | 1175  | E=8.40615e-72  | 1 |
| RH177I17-5-37144  |          | Y-1-NBS      | 3  | 1245  | 1592  | E=3.5191e-121  |   |
| RH177I17-5-37144  |          | Bs4-LRR      | 1  | 1821  | 1875  | E=2.63175e-13  |   |
| RH177I17-5-37144  |          | Y-1-LRR      | 2  | 2315  | 2681  | E=9.83114e-115 |   |
| RH177I17-5-37144  |          | N-Nt-CNl     | 2  | 2629  | 2789  | E=3.95625e-42  |   |
| RH177I17-5-37144  |          | Bs4-TIR      | 3  | 6682  | 6733  | E=1.12439e-08  | 1 |
| RH177I17-5-37144  |          | N-Lu-TIR     | 1  | 8936  | 9087  | E=1.18311e-28  |   |
| RH177I17-5-37144  |          | Y-1-NBS      | 1  | 9142  | 9489  | E=1.59289e-121 |   |
| RH177I17-5-37144  |          | Y-1-LRR      | 3  | 10385 | 10811 | E=2.30659e-108 |   |
| RH177I17-5-37144  |          | N-Nt-CNl     | 3  | 10763 | 10923 | E=2.86314e-35  |   |
| RH177I17-6-38112  |          | Bs4-CNl      | 3  | 2102  | 2187  | E=1.13901e-17  | 1 |
| RH177I17-6-38112  |          | Bs4-TIR      | 3  | 4141  | 4302  | E=2.35358e-79  | 1 |
| RH177I17-6-38112  |          | Bs4-NBS      | 1  | 4351  | 4717  | E=3.08305e-148 |   |
| RH177I17-6-38112  |          | Gro1-4-NBS   | 3  | 4757  | 4847  | E=1.00389e-06  |   |
| RH177I17-6-38112  |          | N-Nt-LRR     | 3  | 4884  | 5192  | E=1.93522e-86  |   |
| RH177I17-6-38112  |          | Y-1-LRR      | 2  | 5387  | 5506  | E=1.00531e-37  |   |
| RH177I17-6-38112  |          | N-Nt-CNl     | 2  | 5458  | 5622  | E=2.19033e-38  |   |
| RH177I17-6-38112  |          | N-Nt-NBS     | 3  | 8893  | 8960  | E=4.58049e-18  | 1 |
| RH177I17-6-38112  |          | Bs4-NBS      | 2  | 9082  | 9152  | E=3.49014e-08  |   |

|                  |          |            |    |       |       |               |   |
|------------------|----------|------------|----|-------|-------|---------------|---|
| RH177117-6-38112 |          | N-Nt-LRR   | 2  | 9113  | 9214  | E=1.4756e-14  |   |
| RH177117-6-38112 |          | Y-1-LRR    | 1  | 9385  | 9756  | E=3.7315e-118 |   |
| RH177117-6-38112 |          | Bs4-CNL    | 1  | 9700  | 9830  | E=4.27487e-31 |   |
| RH183M06-1-19075 |          | Bs4-NBS    | 3  | 903   | 1000  | E=1.88493e-32 | 1 |
| RH183M06-2-21105 |          | Bs4-TIR    | 2  | 4084  | 4190  | E=1.26253e-40 | 1 |
| RH183M06-2-21105 |          | Bs4-NBS    | 2  | 4241  | 4417  | E=9.98544e-66 |   |
| RH183M06-2-21105 |          | Bs4-NBS    | 1  | 4407  | 4487  | E=1.65752e-15 |   |
| RH186O03-7-46151 | AC237891 | Bs4-TIR    | 3  | 10872 | 11030 | E=1.30567e-68 | 1 |
| RH186O03-7-46151 |          | Bs4-NBS    | 3  | 11087 | 11454 | E=4.4532e-146 |   |
| RH186O03-7-46151 |          | N-Nt-LRR   | 1  | 11703 | 11804 | E=1.879e-15   |   |
| RH186O03-7-46151 |          | Y-1-LRR    | 3  | 11866 | 12256 | E=8.81346e-89 |   |
| RH186O03-7-46151 |          | R1-CC      | -1 | 11915 | 11968 | E=1.827e-12   | 1 |
| RH186O03-7-46151 |          | N-Nt-CNL   | 3  | 12198 | 12349 | E=2.2074e-40  | 1 |
| RH194N09-4-23166 |          | Gro1-4-TIR | -2 | 1958  | 2054  | E=5.57051e-29 | 1 |
| RH194N09-4-23166 |          | Bs4-NBS    | -3 | 2273  | 2594  | E=2.41599e-68 |   |
| RH194N09-4-23166 |          | Gro1-4-TIR | 3  | 3763  | 3902  | E=2.83798e-24 | 1 |
| RH194N09-6-40644 |          | N-Nt-NBS   | -3 | 711   | 1059  | E=3.92323e-63 |   |
| RH194N09-6-40644 |          | Gro1-4-TIR | -1 | 1202  | 1318  | E=9.40379e-36 | 1 |
| RH194N09-6-40644 |          | Bs4-NBS    | -2 | 1995  | 2324  | E=1.77016e-76 |   |
| RH194N09-6-40644 |          | Bs4-LRR    | -1 | 3784  | 3837  | E=9.13952e-07 |   |
| RH194N09-6-40644 |          | Gro1-4-LRR | -3 | 3910  | 4313  | E=1.27583e-45 |   |
| RH194N09-6-40644 |          | N-Nt-CNL   | -3 | 4274  | 4411  | E=3.03554e-06 |   |
| RH194N09-6-40644 |          | Bs4-NBS    | -1 | 4733  | 4870  | E=4.00806e-20 | 1 |
| RH194N09-6-40644 |          | Gro1-4-LRR | -2 | 5700  | 6103  | E=2.13588e-52 |   |
| RH94J12-2-12356  |          | Y-1-CNL    | 2  | 2236  | 2268  | E=2.05128e-07 | 1 |
| RH94J12-2-12356  |          | Y-1-TIR    | 3  | 2815  | 2841  | E=0.0458814   | 1 |
| RH94J12-3-49244  |          | Y-1-LRR    | -3 | 4358  | 4497  | E=5.20787e-33 | 1 |
| RH94J12-3-49244  |          | Bs4-LRR    | -1 | 4477  | 4516  | E=7.73707e-06 |   |
| RH94J12-3-49244  |          | N-Nt-CNL   | -1 | 4502  | 4621  | E=1.3419e-30  |   |
| RH94J12-3-49244  |          | N-Nt-NBS   | 1  | 4920  | 5073  | E=1.53795e-41 | 1 |
| RH94J12-3-49244  |          | Bs4-NBS    | 2  | 5057  | 5249  | E=3.10967e-32 |   |
| RH94J12-3-49244  |          | Y-1-LRR    | 3  | 5273  | 5617  | E=2.21505e-75 |   |
| RH94J12-3-49244  |          | N-Nt-CNL   | 3  | 5572  | 5662  | E=2.53439e-24 |   |
| RH94J12-3-49244  |          | N-Nt-CNL   | 2  | 5676  | 5736  | E=2.569e-06   |   |
| RH94J12-3-49244  |          | Bs4-LRR    | -2 | 11445 | 11548 | E=4.96327e-12 | 1 |
| RH94J12-4-47074  |          | N-Nt-NBS   | 3  | 68    | 175   | E=1.39951e-21 | 1 |
| RH94J12-4-47074  |          | N-Nt-NBS   | 1  | 2829  | 3071  | E=3.70364e-89 |   |
| RH94J12-4-47074  |          | Bs4-LRR    | 2  | 3142  | 3186  | E=2.10334e-09 |   |
| RH94J12-4-47074  |          | Y-1-LRR    | 1  | 3246  | 3609  | E=1.28072e-94 |   |
| RH94J12-4-47074  |          | N-Nt-CNL   | 1  | 3564  | 3688  | E=2.7186e-41  |   |
| RH94J12-4-47074  |          | N-Nt-LRR   | -1 | 7427  | 7501  | E=3.34357e-13 | 1 |

total (partial) RGH: 738
